# Supplementary material
Source: PubMed Central journal article supplement (PMC5777983)
Supplement: mmc1.pdf [file mmc1.pdf]

**The American Journal of Human Genetics, Volume 102**

## **Supplemental Data**

### **Genomic DNA Methylation Signatures Enable Concurrent Diagnosis and Clinical Genetic Variant Classification in Neurodevelopmental Syndromes**

**Erfan Aref-Eshghi, David I. Rodenhiser, Laila C. Schenkel, Hanxin Lin, Cindy Skinner, Peter Ainsworth, Guillaume Paré, Rebecca L. Hood, Dennis E. Bulman, Kristin D. Kernohan, Care4Rare Canada Consortium, Kym M. Boycott, Philippe M. Campeau, Charles Schwartz, and Bekim Sadikovic**

Table S1 - Characteristics of the patient cohort used in the study

| <b>Disease</b> | <b>Id</b> | <b>Sex</b> | <b>Age</b> | <b>Gene</b> | <b>Mutation</b>                        |
|----------------|-----------|------------|------------|-------------|----------------------------------------|
| ATRX           | MS0564    | m          | 6.3        | <i>ATRX</i> | c.6254G>A; p.R2085H                    |
| ATRX           | MS0565    | m          | 18         | <i>ATRX</i> | c.736T>C; p.R246C                      |
| ATRX           | MS0566    | m          | 1.4        | <i>ATRX</i> | c.6593A>G; p.H2198R                    |
| ATRX           | MS0568    | m          | 18.5       | <i>ATRX</i> | c.758T>C; p.L253S                      |
| ATRX           | MS0569    | m          |            | <i>ATRX</i> | c.109C>T; p.R37X                       |
| ATRX           | MS0570    | m          | 21         | <i>ATRX</i> | c.4817G>A; p.S1606N                    |
| ATRX           | MS0571    | m          |            | <i>ATRX</i> | c.865T>C; p.C220R                      |
| ATRX           | MS0572    | m          | 0.7        | <i>ATRX</i> | c.5786A>G; p.K1929R                    |
| ATRX           | MS0573    | m          | 18         | <i>ATRX</i> | c.952G>T; p.G249C                      |
| ATRX           | MS0574    | m          | 14         | <i>ATRX</i> | c.730A>C; p.I244L                      |
| ATRX           | MS0589    | m          | 4.6        | <i>ATRX</i> | c.7156C>T; p.R2386X                    |
| ATRX           | MS0591    | m          | 4.6        | <i>ATRX</i> | c.536A>G, p.N179S                      |
| ATRX           | MS0593    | m          | 4.4        | <i>ATRX</i> | deletion of exon 207                   |
| ATRX           | MS0594    | m          |            | <i>ATRX</i> | c.109C>T; p.R37X                       |
| ATRX           | MS0595    | m          | 27         | <i>ATRX</i> | c.7366_7367 InsA; p.M2456N fs X42      |
| ATRX           | MS0596    | m          | 14.5       | <i>ATRX</i> | c.109C>T; p.R37X                       |
| ATRX           | MS0597    | m          | 2.5        | <i>ATRX</i> | c.736C>T; P.R246C                      |
| ATRX           | MS0598    | m          | 17.5       | <i>ATRX</i> | c.109C>T; p.R37X                       |
| ATRX           | MS0599    | m          | 14         | <i>ATRX</i> | c.109C>T; p.R37X                       |
| CHARGE         | CHD7-1    | f          | 4          | <i>CHD7</i> | c.7282C>T (p.Arg2428*)                 |
| CHARGE         | CHD7-10   | f          | 0.02       | <i>CHD7</i> | c.2905_2906del (p.Arg969Glyfs*25)      |
| CHARGE         | CHD7-11   | m          | 12         | <i>CHD7</i> | c.7636G>T (p.Glu2546*)                 |
| CHARGE         | CHD7-12   | m          | 19         | <i>CHD7</i> | c.361delC (p.Gly121Valfs*90)           |
| CHARGE         | CHD7-13   | m          | 19         | <i>CHD7</i> | c.2504_2508delATCTT (p.Arg835Serfs*14) |
| CHARGE         | CHD7-14   | m          | 4          | <i>CHD7</i> | c.7717-7720del (p.Gln2537*)            |
| CHARGE         | CHD7-15   | m          | 11         | <i>CHD7</i> | c.5458C>T (p.Arg1820*)                 |
| CHARGE         | CHD7-16   | m          | 7          | <i>CHD7</i> | exon 1 deletion                        |

|        |         |   |    |      |                                        |
|--------|---------|---|----|------|----------------------------------------|
| CHARGE | CHD7-17 | m | 15 | CHD7 | c.5405-17G>A                           |
| CHARGE | CHD7-18 | f | 10 | CHD7 | c.5405-7G>A                            |
| CHARGE | CHD7-19 | f | 4  | CHD7 | c.2097-1G>A                            |
| CHARGE | CHD7-2  | m | 6  | CHD7 | c.3526C>T (p.Gln1176*)                 |
| CHARGE | CHD7-3  | f | 14 | CHD7 | c.934C>T (p.Arg312*)                   |
| CHARGE | CHD7-34 | m |    | CHD7 | c.5097dupA (p.Ala1700Serfs*37)         |
| CHARGE | CHD7-36 | m |    | CHD7 | c.799G>T (p.Glu267*)                   |
| CHARGE | CHD7-4  | m | 13 | CHD7 | c562C>T (p.Gly188*)                    |
| CHARGE | CHD7-40 | m |    | CHD7 | c.1312C>T (p.Gln438*)                  |
| CHARGE | CHD7-41 | m |    | CHD7 | c.6322G>A (p.Gly2108Arg)               |
| CHARGE | CHD7-46 | f |    | CHD7 | c.5050G>A (p.Gly1684Ser)               |
| CHARGE | CHD7-47 | f |    | CHD7 | c.5210+3A>G                            |
| CHARGE | CHD7-5  | m | 18 | CHD7 | c.1327delATGGG (p.Met443Asnfs*130)     |
| CHARGE | CHD7-51 | f |    | CHD7 | c.4087delC (p.Leu1363Serfs*9)          |
| CHARGE | CHD7-52 | m |    | CHD7 | c.2498+1G>T                            |
| CHARGE | CHD7-53 | f |    | CHD7 | c.1918delG (p.Gly640Lysfs*71)          |
| CHARGE | CHD7-55 | f |    | CHD7 | c.604 C>T (p.Gln202*)                  |
| CHARGE | CHD7-56 | m |    | CHD7 | c.4393C>T (p.Arg1465*)                 |
| CHARGE | CHD7-58 | f |    | CHD7 | c.5029C>T (p.Arg1677*)                 |
| CHARGE | CHD7-6  | m | 24 | CHD7 | c.2504_2508delATCTT (p.Tyr835Serfs*14) |
| CHARGE | CHD7-60 | m |    | CHD7 | c.3177T>G (p.Tyr1059*)                 |
| CHARGE | CHD7-61 | m |    | CHD7 | c.2839C>T (p.Arg947*)                  |
| CHARGE | CHD7-63 | m |    | CHD7 | c.4361_4362delAG (p.Gln1454Profs*21)   |
| CHARGE | CHD7-64 | f |    | CHD7 | c.2362C>T (p.Gln788*)                  |
| CHARGE | CHD7-68 | f |    | CHD7 | c.8507delC (p.Pro2836Argfs*53)         |
| CHARGE | CHD7-69 | f |    | CHD7 | c.3655C>T (p.Arg1219*)                 |
| CHARGE | CHD7-7  | m | 3  | CHD7 | c.1990G>T (p.Glu664*)                  |
| CHARGE | CHD7-71 | f |    | CHD7 | c.1141_1142delAT (p.Met381Alafs*23)    |
| CHARGE | CHD7-72 | m |    | CHD7 | c.3082A>G (p.Ile1028Val)               |
| CHARGE | CHD7-8  | f | 6  | CHD7 | c.3377dupT (p.Leu1126Phefs*46)         |

|        |        |   |       |             |                                                      |
|--------|--------|---|-------|-------------|------------------------------------------------------|
| CHARGE | CHD7-9 | m | 9     | <i>CHD7</i> | c.2585delA (p.Leu862Serfs*26)                        |
| CHARGE | MS0979 | f | 0.5   | <i>CHD7</i> | c.7252C>T, p.R2418X                                  |
| CHARGE | MS0982 | m | 0.8   | <i>CHD7</i> | c.3655C>T, p.R1219X                                  |
| CHARGE | MS0983 | f | 0.1   | <i>CHD7</i> | c.7282C>T, p.R2428X                                  |
| CHARGE | MS0984 | f | 0.005 | <i>CHD7</i> | c.959_960delAG                                       |
| CHARGE | MS0985 | m | 0.2   | <i>CHD7</i> | c.5607+1G>A                                          |
| CHARGE | MS0987 | m | 0.001 | <i>CHD7</i> | c.4517dupG                                           |
| CHARGE | MS0989 | f | 1.1   | <i>CHD7</i> | c.6716delA                                           |
| CHARGE | MS0991 | f | 15.4  | <i>CHD7</i> | c.3654C>G, p.Y1218X                                  |
| CHARGE | MS0992 | m | 2.1   | <i>CHD7</i> | c.3640C>T, p.Q1214X                                  |
| CHARGE | MS0995 | m | 0.1   | <i>CHD7</i> | c.1972G>T, p.E658X                                   |
| CHARGE | MS0996 | f | 3.2   | <i>CHD7</i> | c.3778+1G>A                                          |
| CHARGE | MS1002 | m | 13.5  | <i>CHD7</i> | c.2464G>T, p.E822X                                   |
| CHARGE | MS1003 | f | 0.8   | <i>CHD7</i> | c.7957C>T, p.R2653X                                  |
| CHARGE | MS1004 | m | 24.7  | <i>CHD7</i> | c.4393C>T, p.R1465X                                  |
| CHARGE | MS1005 | f | 0.01  | <i>CHD7</i> | c.1480C>T, p.R494X                                   |
| CHARGE | MS1007 | m | 0.003 | <i>CHD7</i> | c.559C>T, p.Q187X                                    |
| CHARGE | MS1011 | f | 1.5   | <i>CHD7</i> | c.4015C>T, p.R1339X                                  |
| CHARGE | MS1012 | m | 0.01  | <i>CHD7</i> | c.2049delG                                           |
| CHARGE | MS1013 | f | 3.5   | <i>CHD7</i> | c.6217C>T, p.Q2073X                                  |
| CHARGE | MS1014 | m | 0.01  | <i>CHD7</i> | c.5050+1G>A                                          |
| CHARGE | MS1015 | m | 0.7   | <i>CHD7</i> | c.5405-17G>A, abnormal splicing confirmed by RNA-Seq |
| CHARGE | MS1016 | m | 17.5  | <i>CHD7</i> | c.7047C>A, p.Y2349X                                  |
| CHARGE | MS1019 | f | 0.01  | <i>CHD7</i> | c.7252C>T, p.R2418X                                  |
| CHARGE | MS1021 | f | 8.7   | <i>CHD7</i> | c.5627C>G, p.S1876X                                  |
| CHARGE | MS1022 | m | 0.01  | <i>CHD7</i> | c.1924_1931del8                                      |
| CHARGE | MS1023 | m | 0.5   | <i>CHD7</i> | c.7879C>T, p.R2627X                                  |
| CHARGE | MS1024 | m | 0.001 | <i>CHD7</i> | c.6044delT                                           |
| CHARGE | MS1027 | f | 0.3   | <i>CHD7</i> | c.3339delG                                           |
| CHARGE | MS1029 | m | 0.1   | <i>CHD7</i> | c.4402delG                                           |

|                       |          |   |      |                |                                                |
|-----------------------|----------|---|------|----------------|------------------------------------------------|
| CHARGE                | MS1030   | m | 0.2  | <i>CHD7</i>    | c.5074G>T, p.G1692X                            |
| CHARGE                | MS1032   | m | 1.5  | <i>CHD7</i>    | c.3548 delA                                    |
| CHARGE                | MS1035   | m | 0.2  | <i>CHD7</i>    | c.6243C>A, p.C2081X).                          |
| CHARGE                | MS1036   | f | 0.9  | <i>CHD7</i>    | c.5768dupG                                     |
| CHARGE                | MS1037   | f | 1    | <i>CHD7</i>    | c.7282C>T, p.R2428X                            |
| CHARGE                | MS1038   | m | 2.1  | <i>CHD7</i>    | c.1152delA                                     |
| CHARGE                | MS1039   | f | 0.1  | <i>CHD7</i>    | c.2614-2_2614-1dupAG                           |
| CHARGE                | MS1044   | m | 0.1  | <i>CHD7</i>    | c.5574delA                                     |
| CHARGE                | MS1045   | m | 0.2  | <i>CHD7</i>    | c.4862G>A, p.W1621X                            |
| CHARGE                | MS1046   | f | 0.1  | <i>CHD7</i>    | c.3359delG                                     |
| CHARGE                | MS1049   | m | 10.1 | <i>CHD7</i>    | 7219delA                                       |
| Coffin-Siris Syndrome | MS0674   | m |      | <i>ARID1B</i>  |                                                |
| Coffin-Siris Syndrome | MS0676   | f |      | <i>ARID1B</i>  |                                                |
| Coffin-Siris Syndrome | MS0678   | f |      | <i>ARID1B</i>  |                                                |
| Coffin-Siris Syndrome | MS0679   | f |      | <i>SMARCB1</i> |                                                |
| Coffin-Siris Syndrome | MS0680   | m |      | <i>ARID1B</i>  |                                                |
| Coffin-Siris Syndrome | MS0681   | f |      | <i>SMARCB1</i> |                                                |
| Coffin-Siris Syndrome | MS0683   | m |      | <i>SMARCB1</i> |                                                |
| Coffin-Siris Syndrome | MS0684   | m |      | <i>ARID1B</i>  |                                                |
| Coffin-Siris Syndrome | MS0685   | f |      | <i>ARID1B</i>  |                                                |
| ADCA-DN               | MS0494   | f |      | <i>DNMT1</i>   | DNMT1 - NM_001130823.1:c.1709C>T [p.Ala570Val] |
| ADCA-DN               | MS0495   | f |      | <i>DNMT1</i>   | DNMT1 - NM_001130823.1:c.1709C>T [p.Ala570Val] |
| ADCA-DN               | MS0496   | m |      | <i>DNMT1</i>   | DNMT1 - NM_001130823.1:c.1709C>T [p.Ala570Val] |
| ADCA-DN               | MS0497   | m |      | <i>DNMT1</i>   | DNMT1 - NM_001130823.1:c.1709C>T [p.Ala570Val] |
| ADCA-DN               | MS0498   | m |      | <i>DNMT1</i>   | DNMT1 - NM_001130823.1:c.1709C>T [p.Ala570Val] |
| Kabuki                | KMT2D-1  | f | 15   | <i>KMT2D</i>   | c.15061C>T (p.Arg5021*)                        |
| Kabuki                | KMT2D-10 | m | 6    | <i>KMT2D</i>   | c.4135_4136delA (p.Met1379Valfs*52)            |
| Kabuki                | KMT2D-11 | m | 16   | <i>KMT2D</i>   | c.11710C>T (p.Gln3904*)                        |
| Kabuki                | KMT2D-2  | m | 1    | <i>KMT2D</i>   | c.16318delG (p.Glu5440Argfs*16)                |

|        |          |   |      |              |                                       |
|--------|----------|---|------|--------------|---------------------------------------|
| Kabuki | KMT2D-22 | f |      | <i>KMT2D</i> | c.11158C>T (p.Gln3720*)               |
| Kabuki | KMT2D-25 | f |      | <i>KMT2D</i> | c.16521+1G>T                          |
| Kabuki | KMT2D-26 | f |      | <i>KMT2D</i> | c.1940dupC (p.Pro648Thrfs*2)          |
| Kabuki | KMT2D-29 | m |      | <i>KMT2D</i> | c.15088C>T (p.Arg5030Cys)             |
| Kabuki | KMT2D-3  | m | 18   | <i>KMT2D</i> | c15030dupA (p.Glu5011Argfs*13)        |
| Kabuki | KMT2D-30 | m |      | <i>KMT2D</i> | c.5135delA (p.Lys1712Argfs*10)        |
| Kabuki | KMT2D-32 | m |      | <i>KMT2D</i> | c.16052G>A (p.Arg5351Gln)             |
| Kabuki | KMT2D-33 | f |      | <i>KMT2D</i> | c.11203C>T (p.Gln3735*)               |
| Kabuki | KMT2D-36 | f |      | <i>KMT2D</i> | c.15536G>A (p.Arg5179His)             |
| Kabuki | KMT2D-4  | f | 16   | <i>KMT2D</i> | c.8172_8173delC (p.Phe2724Glnfs*5)    |
| Kabuki | KMT2D-5  | m | 15   | <i>KMT2D</i> | c.6595delT (p.Tyr2199Ilefs*65)        |
| Kabuki | KMT2D-6  | m | 11   | <i>KMT2D</i> | c.14055-14056delCA (p.His4685Glnfs*4) |
| Kabuki | KMT2D-7  | m | 14   | <i>KMT2D</i> | c.6295C>T (p.Arg2099*)                |
| Kabuki | KMT2D-8  | m | 20   | <i>KMT2D</i> | c.4135_4136delA (p.Met1379Valfs*52)   |
| Kabuki | KMT2D-9  | m | 18   | <i>KMT2D</i> | c.12592C>T (p.Arg4198*)               |
| Kabuki | MS0608   | m | 7    | <i>KMT2D</i> | MLL2 c.1801_1822dup 22                |
| Kabuki | MS0711   | f | 6.7  | <i>KMT2D</i> | c.13059delG                           |
| Kabuki | MS0713   | m | 1.9  | <i>KMT2D</i> | c.839+1delG                           |
| Kabuki | MS0719   | f | 3.9  | <i>KMT2D</i> | c.15844C>T (p.R5282X )                |
| Kabuki | MS0720   | m | 21.6 | <i>KMT2D</i> | c.16294C>T (p.R5432W)                 |
| Kabuki | MS0721   | f | 0    | <i>KMT2D</i> | c.8488C>T (p.R2830X )                 |
| Kabuki | MS0738   | f | 3.8  | <i>KMT2D</i> | c.4168dupG                            |
| Kabuki | MS0740   | m | 4.3  | <i>KMT2D</i> | c.15289C>T (p.R5097X )                |
| Kabuki | MS0744   | m | 2.6  | <i>KMT2D</i> | c.4419-2A>G                           |
| Kabuki | MS0774   | f | 16.6 | <i>KMT2D</i> | c.548delC                             |
| Kabuki | MS0776   | f | 3.3  | <i>KMT2D</i> | c.7411C>T (p.R2471X )                 |
| Kabuki | MS0778   | f | 24.1 | <i>KMT2D</i> | c.1966dupC                            |
| Kabuki | MS0782   | f | 9.5  | <i>KMT2D</i> | c.6200delA                            |
| Kabuki | MS0783   | f | 9.3  | <i>KMT2D</i> | c.7933C>T (p.R2645X)                  |
| Kabuki | MS0784   | f | 5.8  | <i>KMT2D</i> | c.13450C>T (p.R4484X )                |

|              |        |   |      |              |                                         |
|--------------|--------|---|------|--------------|-----------------------------------------|
| Kabuki       | MS0786 | f | 19.1 | <i>KMT2D</i> | c.16048A>T (p.K5350X)                   |
| Kabuki       | MS0787 | m | 7.1  | <i>KMT2D</i> | c.10201C>T (p.Q3401X )                  |
| Kabuki       | MS0788 | m | 3.4  | <i>KMT2D</i> | c.16360C>T (p.R5454X )                  |
| Kabuki       | MS0790 | m | 3.1  | <i>KMT2D</i> | c.8692C>T (p.Q2898X )                   |
| Kabuki       | MS0792 | f | 4.1  | <i>KMT2D</i> | c.14878C>T (p.R4960X )                  |
| Kabuki       | MS0793 | f | 23.1 | <i>KMT2D</i> | c.6265A>T (p.K2089X )                   |
| Kabuki       | MS0794 | f | 6.9  | <i>KMT2D</i> | c.10740+1G>A                            |
| Kabuki       | MS0795 | m | 2.2  | <i>KMT2D</i> | c.13652T>A (p.L4551X )                  |
| Kabuki       | MS0796 | f | 1    | <i>KMT2D</i> | c.11596C>T (p.Q3866X )                  |
| Kabuki       | MS0842 | f | 4    | <i>KMT2D</i> | c. 4135_4136delAT                       |
| Claes-Jensen | MS0690 | m | 30   | <i>KDM5C</i> | c.1510G>A; p.V504M                      |
| Claes-Jensen | MS0691 | m | 6    | <i>KDM5C</i> | c.1439C>T; p.P480L                      |
| Claes-Jensen | MS0692 | m | 26   | <i>KDM5C</i> | c.4439_4440delAG; p.fsR1481fxX9         |
| Claes-Jensen | MS0693 | m | 42   | <i>KDM5C</i> | IVS11+5G>A; p.E468GfsX2                 |
| Claes-Jensen | MS0695 | m | 8    | <i>KDM5C</i> | c.1510G>A; p.V504M                      |
| Claes-Jensen | MS0697 | m | 2    | <i>KDM5C</i> | c.1439C>T; p.P480L                      |
| Claes-Jensen | MS0723 | m | 37   | <i>KDM5C</i> | c.229G>A; p.A77T                        |
| Claes-Jensen | MS0726 | m | 28   | <i>KDM5C</i> | c.4439_4440delAG; p.fsR1481fxX9         |
| Claes-Jensen | MS0727 | m | 13   | <i>KDM5C</i> | c.229G>A; p.A77T                        |
| Claes-Jensen | MS0728 | m | 26   | <i>KDM5C</i> | c.1510G>A; p.V504M                      |
| Rett         | MS0516 | f | 1    | <i>MECP2</i> | R106W                                   |
| Rett         | MS0517 | f | 25   | <i>MECP2</i> | R168X                                   |
| Rett         | MS0518 | f | 34   | <i>MECP2</i> | P302R                                   |
| Rett         | MS0519 | f | 2    | <i>MECP2</i> | c1085del1113                            |
| Rett         | MS0520 | f | 1    | <i>MECP2</i> | T158M                                   |
| Rett         | MS0521 | f | 3    | <i>MECP2</i> | 917_939del123                           |
| Rett         | MS0522 | f | 3    | <i>MECP2</i> | deletion in exon 4                      |
| Rett         | MS0523 | f | 1    | <i>MECP2</i> | T158M                                   |
| Rett         | MS0524 | f | 4    | <i>MECP2</i> | P225R                                   |
| Rett         | MS0525 | f | 6    | <i>MECP2</i> | 1157_1197 del 41c (c terminal deletion) |

|              |          |   |      |              |                                                                              |
|--------------|----------|---|------|--------------|------------------------------------------------------------------------------|
| Rett         | MS0526   | f | 1.5  | <i>MECP2</i> | R255X                                                                        |
| Rett         | MS0527   | m | 0.7  | <i>MECP2</i> | 507 insAG                                                                    |
| Rett         | MS0555   | f | 6    | <i>MECP2</i> | deletion in exon 3 and 4                                                     |
| Rett         | MS0557   | f | 29   | <i>MECP2</i> | R106W                                                                        |
| Rett         | MS0559   | f | 3    | <i>MECP2</i> | T158M                                                                        |
| Rett         | MS0561   | f | 11   | <i>MECP2</i> | R255X                                                                        |
| Rett         | MS0563   | f | 4    | <i>MECP2</i> | partial deletion of exon 4                                                   |
| Coffin-Lowry | MS0513   | f | 6    | <i>RSK2</i>  | c.1520insA; p. fs507X                                                        |
| Coffin-Lowry | MS0514   | m |      | <i>RSK2</i>  | c.1894C>T; p. R632X                                                          |
| Coffin-Lowry | MS0515   | m | 11.5 | <i>RSK2</i>  | c.371G>S; p. fs372X                                                          |
| Coffin-Lowry | MS0528   | m | 11.5 | <i>RSK2</i>  | c.2065C>T; p. Q688X                                                          |
| Coffin-Lowry | MS0530   | m | 4    | <i>RSK2</i>  | c.2186G>A; p. R729Q                                                          |
| Coffin-Lowry | MS0532   | m | 1.3  | <i>RSK2</i>  | c.340C>T; p. W114R                                                           |
| Coffin-Lowry | MS0533   | m | 13   | <i>RSK2</i>  | c.727C>T; p. X243                                                            |
| Coffin-Lowry | MS0534   | m | 22.8 | <i>RSK2</i>  | IVS14+1G>A                                                                   |
| Coffin-Lowry | MS0535   | m | 12   | <i>RSK2</i>  | c.62bp deletion spanning 35bp at 3'end of intron 7 and 29 bp at 5' of exon 8 |
| Coffin-Lowry | MS0536   | m | 2    | <i>RSK2</i>  | c.386insCTTT; p. fs 130 X141                                                 |
| Coffin-Lowry | MS0538   | m | 8    | <i>RSK2</i>  | c.1155delT; p. fs385-X40 codons downstream                                   |
| Sotos        | 11D/6637 | m | 10   | <i>NSDI</i>  | ex15-19 del                                                                  |
| Sotos        | 11D/6718 | f | 10   | <i>NSDI</i>  | c.1716delC (p.Cys573Valfs*26)                                                |
| Sotos        | 11D_0326 | f | 9    | <i>NSDI</i>  | chr5:175,366,008-177,470,488 (hg19)                                          |
| Sotos        | 11D_0328 | f | 7    | <i>NSDI</i>  | chr5:175,764,262-177,059,256 (hg19)                                          |
| Sotos        | A1208    | f | 3.5  | <i>NSDI</i>  | c.6454C>T (p.Arg2152*)                                                       |
| Sotos        | DL117330 | f | 13.2 | <i>NSDI</i>  | c.5445C>G (p.Tyr1815*)                                                       |
| Sotos        | DL122057 | m | 3    | <i>NSDI</i>  | c.4843delT (p.Tyr1615Thrfs*27)                                               |
| Sotos        | DL151889 | m | 2.2  | <i>NSDI</i>  | microdeletion of distal 5q35.2                                               |
| Sotos        | DL159249 | f | 12   | <i>NSDI</i>  | c.6349C>T (p.Arg2117*)                                                       |
| Sotos        | DL168744 | m | 2.2  | <i>NSDI</i>  | c.1492C>T (p.Arg498*)                                                        |
| Sotos        | DL179067 | m | 18   | <i>NSDI</i>  | c.6454C>T (p.Arg2152*)                                                       |
| Sotos        | DL38402  | m | 19.7 | <i>NSDI</i>  | c.1583delA (p.Lys528Argfs*8)                                                 |



|                 |          |   |      |              |                                                                     |
|-----------------|----------|---|------|--------------|---------------------------------------------------------------------|
| Sotos           | DL50448  | m | 8    | <i>NSDI</i>  | c.2014-2018delACAGA (p.Thr672Glufs*9)                               |
| Sotos           | DL50450  | m | 41   | <i>NSDI</i>  | c.2014-2018delACAGA (p.Thr672Glufs*9)                               |
| Sotos           | DL50452  | f | 2    | <i>NSDI</i>  | c.2014-2018delACAGA (p.Thr672Glufs*9)                               |
| Sotos           | DL76010  | f | 1.6  | <i>NSDI</i>  | c.1810C>T (p.Arg604*)                                               |
| Sotos           | DL87406  | m | 0.5  | <i>NSDI</i>  | 5q35.2-35.3 (RP11-67P18 to RP11-423H2), FISH BAC RP11-99N22 deleted |
| Sotos           | DL89813  | m | 10.6 | <i>NSDI</i>  | c.1801A>T (p.Lys601*)                                               |
| Sotos           | DL94609  | m | 20   | <i>NSDI</i>  | 4977_4978insG (p.Arg1660Alafs*13)                                   |
| Sotos           | HK-10067 | m |      | <i>NSDI</i>  | c.6013C>T (p.Arg2005*)                                              |
| Sotos           | HK-11302 | f |      | <i>NSDI</i>  | c.5397_c.5398insT (p.Gly1800Trpfs*3)                                |
| Sotos           | HK-11807 | f |      | <i>NSDI</i>  | c.5887A>T (p.Lys1963*)                                              |
| Sotos           | HK-13565 | f |      | <i>NSDI</i>  | c.2607_c.2608insA (p.Arg870Lysfs*5)                                 |
| Sotos           | HK-15164 | f |      | <i>NSDI</i>  | WGD-Whole gene deletion                                             |
| Sotos           | HK-1540  | m |      | <i>NSDI</i>  | WGD-Whole gene deletion                                             |
| Sotos           | HK-15438 | f |      | <i>NSDI</i>  | WGD-Whole gene deletion                                             |
| Sotos           | HK-2129  | f |      | <i>NSDI</i>  | c.4417C>T (p.Arg1473*)                                              |
| Sotos           | HK-4470  | f |      | <i>NSDI</i>  | c.1754C>G (p.Ser585*)                                               |
| Sotos           | HK-4913  | f |      | <i>NSDI</i>  | c.2362C>T (p.Arg788*)                                               |
| Sotos           | HK-5107  | f |      | <i>NSDI</i>  | WGD-Whole gene deletion                                             |
| Sotos           | HK-5439  | f |      | <i>NSDI</i>  | c.3728delG (p.Ser1243Thrfs*14)                                      |
| Sotos           | HK-5530  | m |      | <i>NSDI</i>  | c.2334_c.2335insA (p.His779Thrfs*30)                                |
| Sotos           | HK-5533  | m |      | <i>NSDI</i>  | c.2314delG (p.Ala772Glnfs*19)                                       |
| Sotos           | HK-5589  | f |      | <i>NSDI</i>  | c.1310C>G (p.Ser437*)                                               |
| Sotos           | HK-5977  | f |      | <i>NSDI</i>  | c.6349C>T (p.Arg2117*)                                              |
| Sotos           | HK-6779  | m |      | <i>NSDI</i>  | c.3067C>T (p.Arg1023*)                                              |
| Sotos           | HK-6966  | f |      | <i>NSDI</i>  | c.5296C>A (R1766X p.= (p.Arg1766Arg))                               |
| Sotos           | HK-7783  | m |      | <i>NSDI</i>  | c.4217delGAAA (p.Arg1406Asnfs*12)                                   |
| Floating Harbor | MS0433   | m |      | <i>SRCAP</i> |                                                                     |
| Floating Harbor | MS0434   | f |      | <i>SRCAP</i> |                                                                     |
| Floating Harbor | MS0435   | m |      | <i>SRCAP</i> |                                                                     |
| Floating Harbor | MS0437   | f |      | <i>SRCAP</i> |                                                                     |

|                          |        |   |       |              |                                                                                |
|--------------------------|--------|---|-------|--------------|--------------------------------------------------------------------------------|
| Floating Harbor          | MS0439 | f |       | <i>SRCAP</i> |                                                                                |
| Floating Harbor          | MS0440 | f |       | <i>SRCAP</i> |                                                                                |
| Floating Harbor          | MS0441 | f |       | <i>SRCAP</i> |                                                                                |
| Floating Harbor          | MS0442 | f |       | <i>SRCAP</i> |                                                                                |
| Floating Harbor          | MS0443 | m |       | <i>SRCAP</i> |                                                                                |
| Floating Harbor          | MS0444 | m |       | <i>SRCAP</i> |                                                                                |
| Floating Harbor          | MS0445 | m |       | <i>SRCAP</i> |                                                                                |
| Floating Harbor          | MS0446 | f |       | <i>SRCAP</i> |                                                                                |
| Floating Harbor          | MS0447 | f |       | <i>SRCAP</i> |                                                                                |
| Floating Harbor          | MS0449 | f |       | <i>SRCAP</i> |                                                                                |
| Floating Harbor          | MS0450 | f |       | <i>SRCAP</i> |                                                                                |
| Floating Harbor          | MS0451 | m |       | <i>SRCAP</i> |                                                                                |
| Floating Harbor          | MS0452 | f |       | <i>SRCAP</i> |                                                                                |
| Saethre-Chotzen Syndrome | MS0611 | f | 0.003 | <i>TWIST</i> | c.385_405dup21                                                                 |
| Saethre-Chotzen Syndrome | MS0612 | m | 5.7   | <i>TWIST</i> | c.261del13                                                                     |
| Saethre-Chotzen Syndrome | MS0613 | f | 0.9   | <i>TWIST</i> | c.156delC                                                                      |
| Saethre-Chotzen Syndrome | MS0614 | m | 38    | <i>TWIST</i> | A G>T transversion at nucleotide 376 was detected (E126X)                      |
| Saethre-Chotzen Syndrome | MS0615 | m | 30    | <i>TWIST</i> | A 21 basepair insertion beginning at nucleotide 406 was detected.              |
| Saethre-Chotzen Syndrome | MS0617 | f | 33.5  | <i>TWIST</i> | The deletion of a cytosine at nucleotide 156 was detected.                     |
| Saethre-Chotzen Syndrome | MS0618 | m | 17.7  | <i>TWIST</i> | Insertion of 21 base pairs beginning at nucleotide 418                         |
| Saethre-Chotzen Syndrome | MS0624 | f | 20.7  | <i>TWIST</i> | c.211C>T, p.Q71X                                                               |
| Saethre-Chotzen Syndrome | MS0625 | m | 0.7   | <i>TWIST</i> | c.325C>T, p.Q109X                                                              |
| Saethre-Chotzen Syndrome | MS0626 | m | 0.1   | <i>TWIST</i> | c.396_416dup21                                                                 |
| Saethre-Chotzen Syndrome | MS0632 | f | 0.01  | <i>TWIST</i> | c.193G>T, p.E65X                                                               |
| Saethre-Chotzen Syndrome | MS0633 | f | 23.3  | <i>TWIST</i> | c.472T>C, p.F158L                                                              |
| Saethre-Chotzen Syndrome | MS0638 | f | 0.35  | <i>TWIST</i> | entire <i>TWIST</i> gene deleted                                               |
| Saethre-Chotzen Syndrome | MS0648 | f | 0.003 | <i>TWIST</i> | MLPA analysis detected a full gene deletion involving the <i>TWIST</i> gene.   |
| Saethre-Chotzen Syndrome | MS0653 | f | 0.7   | <i>TWIST</i> | A G>T transition at nucleotide 160 (stop codon for a glycine at amino acid 54) |
| Saethre-Chotzen Syndrome | MS0654 | f | 20.5  | <i>TWIST</i> | c.397_417dup21                                                                 |
| Saethre-Chotzen Syndrome | MS0656 | m | 0.6   | <i>TWIST</i> | c.120_145del26                                                                 |

|                          |          |   |      |              |                                                                   |
|--------------------------|----------|---|------|--------------|-------------------------------------------------------------------|
| Saethre-Chotzen Syndrome | MS0657   | f | 23.5 | <i>TWIST</i> | c.149delC                                                         |
| Saethre-Chotzen Syndrome | MS0660   | f | 12.3 | <i>TWIST</i> | A 21 base pair deletion beginning at nucleotide 394 was detected. |
| Saethre-Chotzen Syndrome | MS0665   | f | 21.5 | <i>TWIST</i> | c.352C>G, p.R118G                                                 |
| Saethre-Chotzen Syndrome | MS0668   | f | 0.8  | <i>TWIST</i> | c.376G>T, p.Gln126X                                               |
| Saethre-Chotzen Syndrome | MS0669   | f | 28.7 | <i>TWIST</i> | c.490C>T, p.Q164X                                                 |
| Saethre-Chotzen Syndrome | MS0688   | m | 0.02 | <i>TWIST</i> | c.149delC                                                         |
| Saethre-Chotzen Syndrome | MS0689   | f | 0.1  | <i>TWIST</i> | c.149delC                                                         |
| Saethre-Chotzen Syndrome | MS0844   | f | 23.5 | <i>TWIST</i> | full gene deletion of <i>TWIST</i>                                |
| Weaver                   | A117     | f |      | <i>EZH2</i>  | c.394C>T (p.Pro132Ser)                                            |
| Weaver                   | A123     | m |      | <i>EZH2</i>  | c.457_459del (p.Tyr153del)                                        |
| Weaver                   | A134     | f |      | <i>EZH2</i>  | c.2080C>T (p.His694Tyr)                                           |
| Weaver                   | A1359    | m |      | <i>EZH2</i>  | c.2050C>T (p.Arg684Cys)                                           |
| Weaver                   | A212     | f |      | <i>EZH2</i>  | c.398A>G (p.Tyr133Cys)                                            |
| Weaver                   | DL129940 | m |      | <i>EZH2</i>  | c.1876G>A (p.Val626Met)                                           |
| Weaver                   | F0123    | m |      | <i>EZH2</i>  | c.553G>C (p.Asp185His)                                            |
| GTPTS                    | MS0673   | f |      | <i>KAT6B</i> |                                                                   |
| GTPTS                    | MS0675   | m |      | <i>KAT6B</i> |                                                                   |
| GTPTS                    | MS0677   | m |      | <i>KAT6B</i> |                                                                   |
| SBBYSS                   | MS0682   | f |      | <i>KAT6B</i> |                                                                   |

Age and mutation information from some of the samples have been masked to protect the identities. Reference sequence for all mutations is hg19, except for *NSD1* mutations (hg18, unless specified otherwise [11D-0326 and 11D-0328])

Table S2 – Probes shared by the epi-signatures of more than two conditions

| Probe      | Chr   | Position  | Genes               | Enhancer | CpG island | ADCA-DN | Floating Harbor | ATRX | Kabuki | CHARGE | Claes-Jensen | Sotos | GTPTS | SBYSS |
|------------|-------|-----------|---------------------|----------|------------|---------|-----------------|------|--------|--------|--------------|-------|-------|-------|
| cg20768358 | chr1  | 3574999   | <i>TP73</i>         |          | OpenSea    |         |                 | Yes  | Yes    |        |              | Yes   |       |       |
| cg04015962 | chr1  | 10949192  |                     |          | OpenSea    |         |                 |      | Yes    |        | Yes          | Yes   |       |       |
| cg06790069 | chr1  | 40203513  | <i>PPIE</i>         |          | N_Shore    |         | Yes             |      |        | Yes    |              |       |       | Yes   |
| cg02283735 | chr1  | 44011587  | <i>PTPRF</i>        | TRUE     | OpenSea    |         |                 |      | Yes    |        | Yes          | Yes   |       |       |
| cg06766016 | chr1  | 45278971  | <i>BTBD19</i>       |          | Island     |         | Yes             |      |        |        | Yes          | Yes   |       |       |
| cg19530728 | chr1  | 45279132  | <i>BTBD19</i>       |          | Island     |         | Yes             |      |        |        | Yes          | Yes   |       |       |
| cg04605287 | chr1  | 54953486  |                     |          | N_Shore    |         |                 |      | Yes    |        | Yes          | Yes   |       |       |
| cg08128444 | chr1  | 68966466  |                     |          | S_Shelf    |         |                 | Yes  |        | Yes    |              | Yes   |       |       |
| cg20457732 | chr1  | 71172486  |                     | TRUE     | OpenSea    |         | Yes             |      |        |        | Yes          | Yes   |       |       |
| cg03847896 | chr1  | 112154295 |                     | TRUE     | OpenSea    |         | Yes             | Yes  |        | Yes    |              |       |       |       |
| cg25066665 | chr1  | 150335507 | <i>RPRD2</i>        |          | N_Shore    |         | Yes             |      |        |        | Yes          | Yes   |       |       |
| cg15448220 | chr1  | 150897856 | <i>SETDB1</i>       |          | N_Shore    |         | Yes             |      |        |        | Yes          | Yes   |       |       |
| cg10589385 | chr1  | 150898437 | <i>SETDB1</i>       |          | N_Shore    |         | Yes             |      |        |        | Yes          | Yes   |       |       |
| cg13069100 | chr1  | 155035008 | <i>ADAM15;EFNA4</i> |          | Island     |         | Yes             |      |        | Yes    |              |       |       | Yes   |
| cg09938479 | chr1  | 178455912 |                     |          | Island     |         | Yes             |      | Yes    |        | Yes          | Yes   |       |       |
| cg26004771 | chr1  | 178456093 |                     |          | Island     |         | Yes             |      |        |        | Yes          | Yes   |       |       |
| cg22790377 | chr1  | 228291668 | <i>C1orf35</i>      |          | S_Shore    |         | Yes             | Yes  | Yes    |        |              |       |       |       |
| cg20462561 | chr1  | 228890820 |                     |          | Island     |         | Yes             |      | Yes    |        |              | Yes   |       |       |
| cg03982998 | chr1  | 238024671 | <i>LOC100130331</i> |          | OpenSea    |         |                 | Yes  |        | Yes    |              | Yes   |       |       |
| cg11166453 | chr1  | 247681781 |                     |          | Island     |         | Yes             |      |        |        | Yes          | Yes   |       | Yes   |
| cg06362358 | chr1  | 248855545 |                     |          | S_Shore    |         | Yes             | Yes  | Yes    |        |              |       |       |       |
| cg03701930 | chr10 | 1981436   |                     |          | OpenSea    |         |                 |      | Yes    | Yes    |              | Yes   |       |       |
| cg08584759 | chr10 | 11912126  | <i>C10orf47</i>     |          | Island     |         |                 |      | Yes    | Yes    |              | Yes   |       |       |
| cg20137746 | chr10 | 27235598  |                     |          | OpenSea    |         | Yes             | Yes  |        |        |              | Yes   |       |       |
| cg01001533 | chr10 | 44184868  |                     |          | N_Shore    |         |                 |      | Yes    |        |              | Yes   | Yes   |       |
| cg24530234 | chr10 | 44224014  |                     |          | Island     |         | Yes             | Yes  |        |        |              | Yes   |       |       |
| cg12845268 | chr10 | 63657363  |                     | TRUE     | OpenSea    |         |                 |      | Yes    |        | Yes          | Yes   |       |       |

|            |       |           |                   |      |         |     |     |     |     |     |     |     |     |     |
|------------|-------|-----------|-------------------|------|---------|-----|-----|-----|-----|-----|-----|-----|-----|-----|
| cg09411922 | chr10 | 75121857  |                   |      | S_Shelf |     |     | Yes |     | Yes |     | Yes |     |     |
| cg12667595 | chr10 | 81743362  |                   |      | Island  |     | Yes |     | Yes |     |     | Yes |     |     |
| cg16844333 | chr10 | 89167457  |                   |      | OpenSea | Yes | Yes |     |     |     |     | Yes |     |     |
| cg23615741 | chr10 | 101297642 |                   | TRUE | Island  |     | Yes |     | Yes |     |     |     | Yes | Yes |
| cg27245056 | chr10 | 122356491 |                   |      | OpenSea |     | Yes | Yes |     | Yes |     |     |     |     |
| cg07040013 | chr10 | 132099553 |                   |      | OpenSea | Yes |     |     | Yes |     |     | Yes |     |     |
| cg22079043 | chr11 | 1785631   | <i>CTSD;HCCA2</i> |      | S_Shore |     | Yes |     |     |     | Yes | Yes |     |     |
| cg13924715 | chr11 | 10750890  |                   |      | OpenSea |     |     | Yes | Yes |     |     | Yes |     |     |
| cg05488217 | chr11 | 58730897  |                   | TRUE | N_Shore |     | Yes |     |     | Yes |     |     | Yes |     |
| cg17379860 | chr11 | 61159602  | <i>TMEM216</i>    |      | N_Shore |     |     | Yes |     |     | Yes | Yes |     |     |
| cg04638150 | chr11 | 62273418  | <i>AHNAK</i>      | TRUE | OpenSea |     |     | Yes | Yes |     |     | Yes |     |     |
| cg01178624 | chr11 | 65360327  | <i>KCNK7</i>      |      | Island  |     | Yes |     | Yes |     |     |     |     | Yes |
| cg22203628 | chr11 | 69241075  |                   |      | OpenSea |     | Yes |     |     | Yes |     | Yes |     |     |
| cg04006327 | chr11 | 72533487  | <i>ATG16L2</i>    | TRUE | Island  |     | Yes |     |     | Yes |     |     |     | Yes |
| cg03274739 | chr11 | 98437942  |                   |      | OpenSea |     | Yes |     |     | Yes |     | Yes |     |     |
| cg06137123 | chr11 | 129444480 |                   |      | OpenSea |     |     | Yes | Yes | Yes |     | Yes |     |     |
| cg05237469 | chr11 | 133446415 |                   |      | OpenSea |     |     | Yes | Yes |     | Yes |     |     |     |
| cg10635895 | chr12 | 2339439   | <i>CACNA1C</i>    |      | Island  |     | Yes |     |     |     | Yes | Yes |     |     |
| cg01837362 | chr12 | 34492938  |                   |      | N_Shore |     |     | Yes | Yes |     |     | Yes |     |     |
| cg16615454 | chr12 | 50475167  | <i>ACCN2</i>      |      | Island  |     |     | Yes |     |     |     | Yes | Yes |     |
| cg03146625 | chr12 | 54448729  | <i>HOXC4</i>      |      | S_Shore |     |     |     | Yes | Yes |     | Yes |     |     |
| cg17970299 | chr12 | 54772804  | <i>ZNF385A</i>    | TRUE | Island  |     | Yes | Yes | Yes |     |     |     |     |     |
| cg08425810 | chr12 | 58132558  | <i>AGAP2</i>      |      | Island  |     |     |     | Yes | Yes |     | Yes |     |     |
| cg00047843 | chr12 | 83321412  | <i>TMTC2</i>      | TRUE | OpenSea |     |     | Yes |     | Yes |     | Yes |     |     |
| cg10082647 | chr12 | 107348855 | <i>C12orf23</i>   |      | N_Shore |     |     |     |     |     | Yes | Yes | Yes |     |
| cg11367159 | chr12 | 110044531 |                   | TRUE | OpenSea |     | Yes |     |     |     | Yes | Yes |     |     |
| cg10504392 | chr12 | 110044639 |                   | TRUE | OpenSea |     | Yes |     |     |     | Yes | Yes |     |     |
| cg13810723 | chr12 | 119592343 | <i>SRRM4</i>      |      | S_Shore | Yes |     | Yes |     |     |     | Yes |     |     |
| cg08083251 | chr13 | 23309930  |                   |      | OpenSea |     | Yes |     | Yes |     |     | Yes |     |     |
| cg13614409 | chr13 | 31506752  | <i>C13orf26</i>   |      | OpenSea |     | Yes |     | Yes |     |     | Yes |     |     |

|            |       |           |                   |      |         |     |     |     |     |     |     |     |     |     |
|------------|-------|-----------|-------------------|------|---------|-----|-----|-----|-----|-----|-----|-----|-----|-----|
| cg26168643 | chr13 | 88328009  | <i>SLITRK5</i>    |      | N_Shore |     |     | Yes | Yes | Yes |     |     |     |     |
| cg24626752 | chr13 | 88328274  | <i>SLITRK5</i>    |      | N_Shore |     |     |     | Yes | Yes |     |     |     | Yes |
| cg05757365 | chr13 | 88328471  | <i>SLITRK5</i>    |      | N_Shore |     |     |     | Yes | Yes |     |     |     | Yes |
| cg08602346 | chr13 | 113242997 | <i>TUBGCP3</i>    |      | S_Shore |     |     |     |     |     | Yes | Yes | Yes |     |
| cg14009504 | chr14 | 71555837  | <i>PCNX</i>       | TRUE | OpenSea |     |     | Yes |     | Yes |     | Yes |     |     |
| cg09214243 | chr15 | 29968124  |                   |      | S_Shore |     |     |     | Yes |     | Yes | Yes |     |     |
| cg12414681 | chr15 | 29968195  |                   |      | S_Shore |     |     |     | Yes |     | Yes | Yes |     |     |
| cg09456065 | chr15 | 56759655  |                   |      | S_Shelf |     |     | Yes |     | Yes |     | Yes |     |     |
| cg02703787 | chr15 | 93256789  |                   |      | N_Shore |     | Yes | Yes |     |     |     |     | Yes |     |
| cg27009812 | chr16 | 3062597   | <i>CLDN9</i>      | TRUE | N_Shore |     |     |     |     | Yes | Yes | Yes |     |     |
| cg04715503 | chr16 | 3062795   | <i>CLDN9</i>      | TRUE | N_Shore |     |     |     |     | Yes | Yes | Yes |     |     |
| cg00524708 | chr16 | 31159558  | <i>PRSS36</i>     |      | N_Shore |     |     | Yes | Yes |     |     | Yes |     |     |
| cg10424751 | chr16 | 32289757  |                   |      | Island  |     |     | Yes | Yes |     |     | Yes |     |     |
| cg00130223 | chr16 | 33070551  |                   |      | Island  |     |     |     | Yes | Yes |     | Yes |     |     |
| cg03203197 | chr16 | 34587120  |                   |      | Island  |     |     |     | Yes | Yes |     | Yes |     |     |
| cg01517680 | chr16 | 49499006  |                   | TRUE | Island  |     | Yes | Yes |     |     |     | Yes |     |     |
| cg12499872 | chr16 | 58019893  | <i>TEPP</i>       |      | Island  | Yes |     | Yes |     |     |     | Yes |     |     |
| cg09482050 | chr16 | 67686832  | <i>RLTPR</i>      |      | N_Shore |     | Yes | Yes |     |     |     | Yes |     |     |
| cg06911613 | chr16 | 85846184  |                   |      | S_Shore |     |     |     | Yes |     |     | Yes |     | Yes |
| cg04387835 | chr17 | 4649076   | <i>ZMYND15</i>    |      | OpenSea |     |     | Yes | Yes |     |     | Yes |     |     |
| cg17900689 | chr17 | 4649262   | <i>ZMYND15</i>    |      | OpenSea |     |     | Yes | Yes |     |     | Yes |     |     |
| cg03613822 | chr17 | 7115140   | <i>DLG4</i>       |      | N_Shelf |     | Yes | Yes | Yes |     |     |     |     |     |
| cg19786602 | chr17 | 7966326   |                   |      | OpenSea |     |     | Yes | Yes |     |     | Yes |     |     |
| cg06663305 | chr17 | 8095813   |                   |      | S_Shelf |     | Yes | Yes | Yes |     |     |     |     |     |
| cg16006004 | chr17 | 41278241  | <i>BRCA1;NBR2</i> |      | Island  |     | Yes |     | Yes |     |     |     |     | Yes |
| cg07075026 | chr17 | 47091521  | <i>IGF2BP1</i>    |      | Island  |     | Yes |     |     | Yes |     | Yes |     |     |
| cg10950924 | chr17 | 47092072  | <i>IGF2BP1</i>    | TRUE | Island  |     | Yes |     |     | Yes |     | Yes |     |     |
| cg18040354 | chr17 | 53800484  | <i>TMEM100</i>    |      | OpenSea |     | Yes |     |     | Yes | Yes |     |     |     |
| cg12131208 | chr17 | 58499700  | <i>C17orf64</i>   | TRUE | S_Shore |     |     |     | Yes |     | Yes | Yes |     |     |
| cg21122199 | chr17 | 58499720  | <i>C17orf64</i>   | TRUE | S_Shore | Yes |     |     |     |     | Yes | Yes |     |     |

|            |       |           |                      |      |         |     |     |     |     |     |     |     |     |     |
|------------|-------|-----------|----------------------|------|---------|-----|-----|-----|-----|-----|-----|-----|-----|-----|
| cg08122232 | chr17 | 74100132  | <i>EXOC7</i>         |      | S_Shore |     | Yes |     |     |     | Yes | Yes | Yes |     |
| cg12082025 | chr19 | 1064218   | <i>ABCA7</i>         |      | Island  |     | Yes | Yes |     |     |     | Yes |     |     |
| cg14576825 | chr19 | 1676136   |                      |      | Island  | Yes |     |     |     |     |     |     | Yes | Yes |
| cg18795569 | chr19 | 3480508   | <i>C19orf77</i>      |      | N_Shore |     | Yes | Yes |     |     |     | Yes |     |     |
| cg02085507 | chr19 | 6739192   | <i>TRIP10</i>        |      | N_Shore |     | Yes |     | Yes |     |     | Yes |     |     |
| cg22987448 | chr19 | 8591364   | <i>MYO1F</i>         |      | Island  |     | Yes |     | Yes | Yes |     |     |     |     |
| cg08283130 | chr19 | 8591776   | <i>MYO1F</i>         |      | Island  |     | Yes |     | Yes | Yes |     |     |     |     |
| cg14266237 | chr19 | 12995624  | <i>KLF1</i>          |      | N_Shore |     | Yes |     |     |     | Yes |     |     | Yes |
| cg19492423 | chr19 | 18700933  | <i>C19orf60</i>      |      | S_Shore |     | Yes | Yes | Yes |     | Yes |     |     | Yes |
| cg21977234 | chr19 | 18701320  | <i>C19orf60</i>      |      | S_Shore |     | Yes | Yes |     |     | Yes |     |     | Yes |
| cg26931208 | chr19 | 49244592  | <i>IZUMO1</i>        |      | S_Shore |     | Yes | Yes |     |     |     | Yes |     |     |
| cg26750002 | chr19 | 49244674  | <i>IZUMO1;RASIP1</i> |      | S_Shore |     | Yes | Yes |     |     |     | Yes |     |     |
| cg17434634 | chr19 | 49522954  |                      | TRUE | Island  |     | Yes |     |     |     |     |     | Yes | Yes |
| cg05934682 | chr19 | 50394298  | <i>ILAI1</i>         | TRUE | S_Shore |     |     | Yes | Yes |     |     | Yes |     |     |
| cg11383165 | chr19 | 56002283  | <i>SSC5D</i>         |      | Island  |     |     |     | Yes |     |     | Yes |     | Yes |
| cg16151651 | chr2  | 1609119   |                      |      | OpenSea |     | Yes |     |     |     | Yes | Yes |     |     |
| cg18396357 | chr2  | 50201413  | <i>NRXN1</i>         |      | OpenSea |     | Yes | Yes |     | Yes |     |     |     |     |
| cg09692695 | chr2  | 74668286  | <i>RTKN</i>          |      | Island  |     |     | Yes |     |     | Yes | Yes |     |     |
| cg25334934 | chr2  | 121269348 |                      | TRUE | OpenSea |     |     |     | Yes |     | Yes | Yes |     |     |
| cg18478731 | chr2  | 129659682 |                      |      | Island  |     | Yes |     | Yes |     |     | Yes |     |     |
| cg11942181 | chr2  | 129659946 |                      |      | Island  |     | Yes |     | Yes |     |     | Yes |     |     |
| cg09015973 | chr2  | 131673771 | <i>ARHGEF4</i>       |      | Island  |     |     |     | Yes |     |     | Yes |     | Yes |
| cg03727500 | chr2  | 232348334 |                      | TRUE | Island  |     |     |     | Yes |     | Yes | Yes |     |     |
| cg11559198 | chr2  | 232348794 |                      |      | Island  |     |     |     | Yes |     | Yes | Yes |     |     |
| cg05857996 | chr20 | 2675418   | <i>EBF4</i>          | TRUE | S_Shore |     |     |     | Yes |     | Yes | Yes |     |     |
| cg24263062 | chr20 | 2730191   | <i>EBF4</i>          |      | Island  |     |     |     | Yes |     | Yes | Yes |     |     |
| cg12176783 | chr20 | 62694000  | <i>TCEA2</i>         |      | Island  |     | Yes |     | Yes |     |     |     |     | Yes |
| cg05437132 | chr21 | 10990903  | <i>TPTE</i>          |      | Island  |     |     | Yes |     | Yes |     | Yes |     |     |
| cg04767174 | chr21 | 15069190  |                      |      | Island  |     |     | Yes | Yes |     |     | Yes |     |     |
| cg08597025 | chr21 | 15077096  |                      |      | Island  |     |     | Yes |     | Yes |     | Yes |     |     |

|            |       |           |                    |      |         |     |     |     |     |     |     |     |     |     |
|------------|-------|-----------|--------------------|------|---------|-----|-----|-----|-----|-----|-----|-----|-----|-----|
| cg21916358 | chr21 | 15077562  |                    |      | Island  |     |     | Yes | Yes | Yes |     | Yes |     |     |
| cg10044179 | chr21 | 15352983  | <i>C21orf81</i>    |      | S_Shore |     |     | Yes | Yes | Yes |     | Yes |     |     |
| cg23720384 | chr21 | 23747055  |                    |      | OpenSea |     |     | Yes | Yes |     |     |     | Yes |     |
| cg14172108 | chr21 | 34405553  |                    |      | N_Shore |     |     |     | Yes |     | Yes | Yes |     |     |
| cg00274965 | chr21 | 34405681  |                    |      | Island  |     |     |     | Yes |     | Yes | Yes |     |     |
| cg03389890 | chr22 | 16868045  |                    |      | Island  |     |     |     | Yes |     |     | Yes | Yes |     |
| cg16054907 | chr22 | 50706065  | <i>MAPK11</i>      |      | Island  |     | Yes | Yes |     | Yes |     |     |     |     |
| cg07225641 | chr3  | 46618325  | <i>LRRC2;TDGF1</i> |      | Island  | Yes |     |     |     |     |     | Yes | Yes |     |
| cg08234664 | chr3  | 49170668  | <i>LAMB2</i>       |      | OpenSea |     | Yes |     |     | Yes |     | Yes | Yes |     |
| cg14099457 | chr3  | 49170794  | <i>LAMB2</i>       |      | OpenSea |     |     |     |     | Yes |     | Yes | Yes |     |
| cg10313047 | chr3  | 52351355  | <i>DNAH1</i>       |      | OpenSea |     | Yes |     |     | Yes |     |     | Yes |     |
| cg00487142 | chr3  | 109056357 | <i>DPPA4</i>       |      | OpenSea |     | Yes | Yes |     |     |     | Yes |     |     |
| cg14836960 | chr3  | 109056618 | <i>DPPA4</i>       |      | OpenSea |     | Yes | Yes |     |     |     | Yes |     |     |
| cg21750709 | chr3  | 109056897 | <i>DPPA4</i>       |      | OpenSea |     | Yes | Yes |     |     |     | Yes |     |     |
| cg01571001 | chr3  | 128215433 |                    |      | Island  |     | Yes |     |     | Yes |     |     |     | Yes |
| cg01757168 | chr3  | 128215565 |                    |      | Island  |     | Yes |     |     | Yes | Yes |     |     | Yes |
| cg09406615 | chr3  | 165555103 | <i>BCHE</i>        | TRUE | OpenSea |     | Yes |     |     |     |     | Yes | Yes |     |
| cg10663765 | chr3  | 194014592 |                    |      | Island  |     |     |     |     | Yes |     | Yes | Yes |     |
| cg23855319 | chr4  | 2062392   | <i>NAT8L</i>       |      | Island  |     | Yes |     |     |     |     | Yes | Yes |     |
| cg16091553 | chr4  | 46126245  | <i>GABRG1</i>      | TRUE | OpenSea |     | Yes |     |     |     | Yes | Yes |     |     |
| cg19676181 | chr4  | 56660398  |                    |      | S_Shore |     | Yes |     |     |     |     | Yes | Yes |     |
| cg06013872 | chr4  | 72203823  | <i>SLC4A4</i>      |      | OpenSea |     | Yes | Yes |     |     | Yes |     |     |     |
| cg03670393 | chr4  | 81128690  |                    | TRUE | Island  | Yes | Yes |     |     |     |     | Yes |     |     |
| cg04511182 | chr4  | 103269584 |                    |      | S_Shelf |     |     | Yes |     |     | Yes |     | Yes |     |
| cg13023646 | chr4  | 165898835 | <i>TRIM61</i>      |      | OpenSea |     | Yes |     |     |     |     | Yes | Yes |     |
| cg11685843 | chr4  | 176349171 |                    |      | OpenSea |     | Yes | Yes | Yes | Yes |     |     |     |     |
| cg09166973 | chr5  | 23507573  | <i>PRDM9</i>       |      | OpenSea |     |     | Yes |     |     | Yes | Yes |     |     |
| cg07011961 | chr5  | 23507594  | <i>PRDM9</i>       |      | OpenSea |     | Yes | Yes |     |     | Yes | Yes | Yes |     |
| cg25472530 | chr5  | 23507617  | <i>PRDM9</i>       |      | OpenSea |     | Yes | Yes |     |     | Yes |     |     |     |
| cg22079902 | chr5  | 23507644  | <i>PRDM9</i>       |      | OpenSea |     |     | Yes |     |     | Yes | Yes |     |     |



|            |      |           |                    |      |         |     |     |     |     |     |     |     |     |     |
|------------|------|-----------|--------------------|------|---------|-----|-----|-----|-----|-----|-----|-----|-----|-----|
| cg01667892 | chr5 | 23507656  | <i>PRDM9</i>       |      | OpenSea |     |     | Yes |     |     | Yes | Yes |     |     |
| cg23688479 | chr5 | 42756851  | <i>CCDC152</i>     |      | OpenSea |     | Yes | Yes |     |     |     | Yes |     |     |
| cg16026035 | chr5 | 70742893  |                    |      | OpenSea |     |     | Yes |     |     | Yes | Yes |     |     |
| cg06501366 | chr5 | 78365687  | <i>BHMT2</i>       | TRUE | Island  |     | Yes | Yes |     |     |     | Yes |     |     |
| cg08328513 | chr5 | 78365691  | <i>BHMT2;DMGDH</i> | TRUE | Island  |     | Yes | Yes |     |     |     | Yes |     |     |
| cg04117076 | chr5 | 88991074  |                    | TRUE | OpenSea |     |     | Yes |     | Yes |     | Yes |     |     |
| cg14575983 | chr5 | 99922152  | <i>FAM174A</i>     |      | OpenSea |     |     | Yes |     | Yes |     | Yes |     |     |
| cg18665594 | chr5 | 101119420 |                    |      | OpenSea |     | Yes |     | Yes |     |     | Yes |     |     |
| cg19526166 | chr5 | 110062729 | <i>TMEM232</i>     |      | OpenSea |     | Yes | Yes |     |     | Yes | Yes |     |     |
| cg26817546 | chr5 | 135538704 |                    | TRUE | OpenSea |     | Yes |     |     |     | Yes | Yes |     |     |
| cg08951638 | chr5 | 141706213 |                    | TRUE | S_Shore | Yes | Yes |     |     |     |     | Yes |     |     |
| cg19731612 | chr5 | 176559334 | <i>NSD1</i>        | TRUE | Island  |     | Yes |     |     |     | Yes | Yes |     |     |
| cg17493885 | chr5 | 176559558 | <i>NSD1</i>        |      | Island  |     | Yes |     |     |     | Yes | Yes |     |     |
| cg18121224 | chr5 | 176559563 | <i>NSD1</i>        |      | Island  |     | Yes |     |     |     | Yes | Yes |     |     |
| cg26092675 | chr6 | 26225258  | <i>HIST1H3E</i>    |      | N_Shore |     | Yes | Yes |     |     | Yes |     |     | Yes |
| cg13836098 | chr6 | 26225268  | <i>HIST1H3E</i>    |      | N_Shore |     | Yes | Yes |     |     | Yes |     |     | Yes |
| cg22040809 | chr6 | 26522578  | <i>HCG11</i>       |      | Island  | Yes |     |     |     |     | Yes | Yes |     |     |
| cg17762073 | chr6 | 34024220  | <i>GRM4</i>        | TRUE | Island  |     |     | Yes |     |     | Yes | Yes |     |     |
| cg20646500 | chr6 | 42536105  | <i>UBR2</i>        |      | S_Shelf |     | Yes | Yes |     | Yes |     |     |     |     |
| cg17097119 | chr6 | 49917872  | <i>DEFB133</i>     |      | OpenSea |     |     | Yes |     | Yes |     | Yes |     |     |
| cg00389785 | chr6 | 55035173  |                    |      | N_Shelf |     | Yes | Yes |     | Yes |     | Yes |     |     |
| cg18090145 | chr6 | 67741714  |                    |      | OpenSea |     |     | Yes | Yes | Yes |     |     |     |     |
| cg14079463 | chr6 | 127796989 | <i>C6orf174</i>    |      | Island  |     | Yes | Yes |     |     | Yes |     |     |     |
| cg04580344 | chr6 | 127797022 | <i>C6orf174</i>    |      | Island  | Yes |     | Yes |     |     | Yes |     |     |     |
| cg08883853 | chr7 | 1026168   | <i>CYP2W1</i>      |      | Island  |     |     |     |     | Yes |     | Yes |     | Yes |
| cg12995372 | chr7 | 11066024  | <i>PHF14</i>       |      | OpenSea |     |     | Yes |     | Yes |     | Yes |     |     |
| cg24231558 | chr7 | 16626326  |                    |      | Island  |     |     | Yes |     | Yes |     | Yes |     |     |
| cg18081818 | chr7 | 23246105  |                    |      | Island  |     |     |     |     |     | Yes | Yes | Yes |     |
| cg05407003 | chr7 | 23246146  |                    |      | Island  |     |     |     |     |     | Yes | Yes | Yes |     |
| cg11015251 | chr7 | 27170554  | <i>HOXA4</i>       | TRUE | Island  |     |     |     | Yes | Yes |     |     | Yes |     |

|            |      |           |         |      |         |     |     |     |     |     |     |     |     |     |
|------------|------|-----------|---------|------|---------|-----|-----|-----|-----|-----|-----|-----|-----|-----|
| cg20974609 | chr7 | 27181671  | HOXA5   |      | N_Shore |     |     |     | Yes | Yes |     |     | Yes |     |
| cg11724970 | chr7 | 27182493  | HOXA5   |      | N_Shore |     |     |     | Yes | Yes |     |     | Yes |     |
| cg05076221 | chr7 | 27182637  | HOXA5   |      | Island  |     |     |     | Yes | Yes |     |     | Yes |     |
| cg23936031 | chr7 | 27183133  | HOXA5   |      | Island  |     |     |     | Yes | Yes |     |     | Yes |     |
| cg04863892 | chr7 | 27183375  | HOXA5   |      | Island  |     |     |     | Yes | Yes |     |     | Yes |     |
| cg19759481 | chr7 | 27183401  | HOXA5   |      | Island  |     |     |     | Yes | Yes |     |     | Yes |     |
| cg02916332 | chr7 | 27183591  | HOXA5   |      | Island  |     |     |     | Yes | Yes |     |     | Yes |     |
| cg17569124 | chr7 | 27183643  | HOXA5   |      | Island  |     |     |     | Yes | Yes |     |     | Yes |     |
| cg02005600 | chr7 | 27183686  | HOXA5   |      | Island  |     |     |     | Yes | Yes |     |     | Yes |     |
| cg25307665 | chr7 | 27183694  | HOXA5   |      | Island  |     |     |     | Yes | Yes |     |     | Yes |     |
| cg14014955 | chr7 | 27183701  | HOXA5   |      | Island  |     |     |     | Yes | Yes |     |     | Yes |     |
| cg02646423 | chr7 | 27183794  | HOXA5   |      | Island  |     |     |     | Yes | Yes |     |     | Yes |     |
| cg20517050 | chr7 | 27183806  | HOXA5   |      | Island  |     |     |     | Yes | Yes |     |     | Yes |     |
| cg23204968 | chr7 | 27183816  | HOXA5   |      | Island  |     |     |     | Yes | Yes |     |     | Yes |     |
| cg20817131 | chr7 | 27184167  | HOXA5   |      | Island  |     |     |     | Yes | Yes |     |     | Yes |     |
| cg25390165 | chr7 | 27184188  | HOXA5   |      | Island  |     |     |     | Yes | Yes |     |     | Yes |     |
| cg14882265 | chr7 | 27184375  | HOXA5   |      | Island  |     |     |     | Yes | Yes |     |     | Yes |     |
| cg17432857 | chr7 | 27184438  | HOXA5   |      | Island  | Yes |     |     | Yes | Yes |     |     | Yes |     |
| cg00969405 | chr7 | 27184441  | HOXA5   |      | Island  |     |     |     | Yes | Yes |     |     | Yes |     |
| cg03368099 | chr7 | 27184521  | HOXA5   |      | Island  |     |     |     | Yes | Yes |     |     | Yes |     |
| cg27151303 | chr7 | 27184821  |         |      | Island  |     |     |     | Yes | Yes |     |     | Yes |     |
| cg24040595 | chr7 | 27185512  | HOXA6   |      | Island  |     |     |     | Yes | Yes |     |     | Yes |     |
| cg23129930 | chr7 | 27186993  | HOXA6   |      | Island  |     |     |     | Yes | Yes |     |     | Yes |     |
| cg05928186 | chr7 | 27187102  | HOXA6   |      | Island  |     |     |     | Yes | Yes |     |     | Yes |     |
| cg02943305 | chr7 | 31685368  | CCDC129 | TRUE | OpenSea |     | Yes | Yes |     | Yes |     |     |     |     |
| cg27385590 | chr7 | 49619841  |         | TRUE | OpenSea |     | Yes |     |     |     |     | Yes | Yes |     |
| cg26766885 | chr7 | 96220185  |         | TRUE | OpenSea |     |     |     |     | Yes |     | Yes |     | Yes |
| cg05715492 | chr7 | 98991138  | ARPC1B  | TRUE | S_Shore |     | Yes |     | Yes |     |     |     |     | Yes |
| cg08234689 | chr7 | 127910927 |         |      | Island  |     |     | Yes |     |     | Yes | Yes |     |     |
| cg26209990 | chr7 | 127911258 |         |      | Island  |     |     | Yes |     |     | Yes | Yes |     |     |

|            |      |           |                   |      |         |     |     |     |     |     |     |     |     |     |
|------------|------|-----------|-------------------|------|---------|-----|-----|-----|-----|-----|-----|-----|-----|-----|
| cg11688949 | chr8 | 27115956  | <i>STMN4</i>      |      | OpenSea | Yes |     |     |     |     | Yes | Yes |     |     |
| cg20893180 | chr8 | 36957379  |                   | TRUE | OpenSea |     |     |     |     |     | Yes | Yes | Yes |     |
| cg08620329 | chr8 | 67454546  |                   | TRUE | Island  |     | Yes | Yes |     |     |     | Yes |     |     |
| cg12109823 | chr8 | 67454595  |                   | TRUE | Island  |     | Yes | Yes |     |     |     | Yes |     |     |
| cg02173067 | chr8 | 111214984 |                   |      | OpenSea |     | Yes |     |     |     |     | Yes | Yes |     |
| cg12873476 | chr8 | 142402728 |                   | TRUE | S_Shore |     | Yes | Yes |     |     | Yes |     |     |     |
| cg23171972 | chr8 | 143203477 |                   |      | S_Shore |     |     |     |     | Yes |     | Yes |     | Yes |
| cg13746854 | chr9 | 34370894  | <i>KIAA1161</i>   | TRUE | Island  |     |     |     | Yes |     | Yes |     |     | Yes |
| cg11510586 | chr9 | 72027409  |                   | TRUE | Island  |     | Yes |     | Yes |     |     | Yes |     |     |
| cg14035368 | chr9 | 139258938 | <i>CARD9;DNLZ</i> |      | Island  |     | Yes |     |     | Yes |     | Yes |     |     |

Table S3 - Top gene ontology terms found to be enriched in the genes harboring probes shared by the epi-signatures of more than two conditions

| Gene Ontology | Gene Ontology Term                                                                                              | N  | DE | P-value  |
|---------------|-----------------------------------------------------------------------------------------------------------------|----|----|----------|
| GO:0007625    | grooming behavior                                                                                               | 17 | 3  | 3.80E-05 |
| GO:2000821    | regulation of grooming behavior                                                                                 | 4  | 2  | 0.000149 |
| GO:0097109    | neuroligin family protein binding                                                                               | 5  | 2  | 0.000504 |
| GO:0033130    | acetylcholine receptor binding                                                                                  | 8  | 2  | 0.0007   |
| GO:0060484    | lung-associated mesenchyme development                                                                          | 10 | 2  | 0.001066 |
| GO:0060044    | negative regulation of cardiac muscle cell proliferation                                                        | 10 | 2  | 0.001096 |
| GO:0018024    | histone-lysine N-methyltransferase activity                                                                     | 43 | 3  | 0.001101 |
| GO:0016279    | protein-lysine N-methyltransferase activity                                                                     | 55 | 3  | 0.001883 |
| GO:0016278    | lysine N-methyltransferase activity                                                                             | 56 | 3  | 0.001955 |
| GO:0042054    | histone methyltransferase activity                                                                              | 56 | 3  | 0.00215  |
| GO:0055022    | negative regulation of cardiac muscle tissue growth                                                             | 14 | 2  | 0.002192 |
| GO:0061117    | negative regulation of heart growth                                                                             | 14 | 2  | 0.002192 |
| GO:0006978    | DNA damage response, signal transduction by p53 class mediator resulting in transcription of p21 class mediator | 16 | 2  | 0.002608 |
| GO:0001891    | phagocytic cup                                                                                                  | 19 | 2  | 0.002654 |
| GO:0047865    | dimethylglycine dehydrogenase activity                                                                          | 1  | 1  | 0.00278  |
| GO:0042772    | DNA damage response, signal transduction resulting in transcription                                             | 17 | 2  | 0.003039 |
| GO:0061627    | S-methylmethionine-homocysteine S-methyltransferase activity                                                    | 1  | 1  | 0.003144 |
| GO:0033477    | S-methylmethionine metabolic process                                                                            | 1  | 1  | 0.003144 |
| GO:0071625    | vocalization behavior                                                                                           | 15 | 2  | 0.003453 |
| GO:0072274    | metanephric glomerular basement membrane development                                                            | 1  | 1  | 0.003898 |

N: Number of genes in the GO term; DE: number of genes that are differentially methylated

Table S4 – Pathways enriched in the genes harboring probes shared by the epi-signatures of more than two conditions

| ID            | Description                                                     | BgRatio  | pvalue   | p.adjust | qvalue   | geneID                            | Count |
|---------------|-----------------------------------------------------------------|----------|----------|----------|----------|-----------------------------------|-------|
| R-HSA-3214841 | PKMTs methylate histone lysines*                                | 73/10281 | 0.000116 | 0.025528 | 0.022841 | <i>PRDM9/SETDB1/HIST1H3E/NSD1</i> | 4     |
| R-HSA-6804759 | Regulation of TP53 Activity through Association with Co-factors | 14/10281 | 0.001057 | 0.104046 | 0.093094 | <i>ZNF385A/TP73</i>               | 2     |
| R-HSA-3000171 | Non-integrin membrane-ECM interactions                          | 64/10281 | 0.001419 | 0.104046 | 0.093094 | <i>LAMB2/LAMC1/NRXN1</i>          | 3     |
| R-HSA-6794362 | Protein-protein interactions at synapses                        | 71/10281 | 0.001914 | 0.105267 | 0.094186 | <i>PTPRF/DLG4/NRXN1</i>           | 3     |
| R-HSA-8849932 | SALM protein interactions at the synapses                       | 21/10281 | 0.002401 | 0.105641 | 0.094521 | <i>PTPRF/DLG4</i>                 | 2     |
| R-HSA-3000157 | Laminin interactions                                            | 33/10281 | 0.00588  | 0.184787 | 0.165336 | <i>LAMB2/LAMC1</i>                | 2     |
| R-HSA-8874081 | MET activates PTK2 signaling                                    | 33/10281 | 0.00588  | 0.184787 | 0.165336 | <i>LAMB2/LAMC1</i>                | 2     |
| R-HSA-168638  | NOD1/2 Signaling Pathway                                        | 36/10281 | 0.006969 | 0.191659 | 0.171484 | <i>CARD9/MAPK11</i>               | 2     |

\*Adjusted p-value<0.05

Table S5 – Probes used for development of a multiclass SVM classification model

| Probe      | Chr   | Position  | Gene             | Islands_Name              | Relation_to_Island |
|------------|-------|-----------|------------------|---------------------------|--------------------|
| cg27619353 | chr22 | 38071651  | <i>LGALS1</i>    | chr22:38073037-38073412   | N_Shore            |
| cg19386379 | chr11 | 844284    | <i>TSPAN4</i>    | chr11:842293-843396       | S_Shore            |
| cg04234016 | chr12 | 7062109   | <i>PTPN6</i>     |                           | OpenSea            |
| cg12474798 | chr10 | 64565772  | <i>ADO</i>       | chr10:64564435-64565818   | Island             |
| cg02583484 | chr12 | 54677008  | <i>HNRNPA1</i>   | chr12:54673322-54673550   | S_Shelf            |
| cg03010887 | chr16 | 85600235  |                  |                           | OpenSea            |
| cg13759905 | chr2  | 233741920 |                  | chr2:233740668-233741879  | S_Shore            |
| cg06768599 | chr14 | 24785488  | <i>LTB4R</i>     | chr14:24785147-24785869   | Island             |
| cg04731926 | chr19 | 35758185  | <i>LSR</i>       | chr19:35758201-35759670   | N_Shore            |
| cg13298859 | chr7  | 2551996   | <i>LFNG</i>      |                           | OpenSea            |
| cg21886367 | chr14 | 24780825  | <i>LTB4R</i>     | chr14:24779874-24780932   | Island             |
| cg12464638 | chr11 | 844400    | <i>TSPAN4</i>    | chr11:842293-843396       | S_Shore            |
| cg07397616 | chr22 | 38035109  | <i>SH3BP1</i>    | chr22:38035350-38035928   | N_Shore            |
| cg18182216 | chr1  | 150978385 | <i>FAM63A</i>    | chr1:150980735-150981092  | N_Shelf            |
| cg15095327 | chr3  | 9944512   | <i>IL17RE</i>    |                           | OpenSea            |
| cg10582687 | chr8  | 48091424  |                  |                           | OpenSea            |
| cg22091609 | chr22 | 20780508  | <i>SCARF2</i>    | chr22:20779386-20780560   | Island             |
| cg21721340 | chr20 | 62682309  | <i>SOX18</i>     | chr20:62679424-62680883   | S_Shore            |
| cg11545720 | chr19 | 4558377   | <i>SEMA6B</i>    | chr19:4558363-4558579     | Island             |
| cg17054691 | chr17 | 79813439  | <i>P4HB</i>      |                           | OpenSea            |
| cg06247837 | chr17 | 37820135  | <i>TCAP</i>      | chr17:37823693-37824989   | N_Shelf            |
| cg05551825 | chr7  | 5735129   | <i>RNF216</i>    |                           | OpenSea            |
| cg03043406 | chr1  | 45242356  | <i>RPS8</i>      | chr1:45241013-45241900    | S_Shore            |
| cg08255475 | chr16 | 88871329  | <i>CDT1</i>      | chr16:88871850-88872056   | N_Shore            |
| cg20978937 | chr14 | 105399321 | <i>PLD4</i>      | chr14:105398076-105400079 | Island             |
| cg01178624 | chr11 | 65360327  | <i>KCNK7</i>     | chr11:65359292-65360328   | Island             |
| cg00551910 | chr14 | 70037973  | <i>C14orf162</i> | chr14:70038108-70040302   | N_Shore            |
| cg11225330 | chr1  | 1196747   | <i>UBE2J2</i>    |                           | OpenSea            |
| cg08818610 | chr6  | 24910720  | <i>FAM65B</i>    | chr6:24910626-24911285    | Island             |
| cg13710969 | chr17 | 79393463  | <i>BAHCC1</i>    | chr17:79393341-79393742   | Island             |
| cg24695071 | chr7  | 2419958   | <i>EIF3B</i>     | chr7:2419808-2420340      | Island             |
| cg03173827 | chr20 | 62688717  | <i>TCEA2</i>     | chr20:62688551-62688878   | Island             |
| cg16823042 | chr12 | 58119992  | <i>AGAP2</i>     | chr12:58119909-58121551   | Island             |
| cg06826457 | chr12 | 12867669  |                  | chr12:12869798-12871248   | N_Shelf            |
| cg14707053 | chr6  | 42019127  | <i>TAF8</i>      | chr6:42018139-42018604    | S_Shore            |
| cg20543544 | chr10 | 81003657  | <i>ZMIZ1</i>     | chr10:81002109-81003687   | Island             |
| cg16565409 | chr17 | 27048223  | <i>RPL23A</i>    | chr17:27046856-27047273   | S_Shore            |
| cg07211044 | chr8  | 60032983  | <i>TOX</i>       | chr8:60030134-60032356    | S_Shore            |
| cg02774542 | chr19 | 11517152  | <i>RGL3</i>      | chr19:11517059-11517284   | Island             |
| cg09978353 | chr17 | 72759282  | <i>SLC9A3R1</i>  |                           | OpenSea            |
| cg10583997 | chr2  | 32583696  | <i>BIRC6</i>     | chr2:32581746-32583265    | S_Shore            |
| cg26372517 | chr1  | 36039159  | <i>TFAP2E</i>    | chr1:36038927-36040051    | Island             |
| cg06359132 | chr10 | 99160096  | <i>RRP12</i>     | chr10:99160814-99161116   | N_Shore            |
| cg15130459 | chr5  | 40834228  | <i>SNORD72</i>   | chr5:40835241-40835873    | N_Shore            |
| cg14371731 | chr10 | 81003175  | <i>ZMIZ1</i>     | chr10:81002109-81003687   | Island             |
| cg27413508 | chr20 | 30225517  | <i>COX4I2</i>    | chr20:30225572-30225852   | N_Shore            |
| cg14307477 | chr19 | 51330469  | <i>KLK15</i>     | chr19:51330212-51330470   | Island             |
| cg22721579 | chr1  | 36787932  | <i>FAM176B</i>   | chr1:36786500-36789402    | Island             |
| cg00973118 | chr16 | 374570    | <i>AXIN1</i>     | chr16:374732-375328       | N_Shore            |
| cg06577850 | chr7  | 84002356  |                  |                           | OpenSea            |
| cg08636573 | chr7  | 100881842 | <i>CLDN15</i>    |                           | OpenSea            |
| cg08481464 | chr10 | 77871618  | <i>C10orf11</i>  | chr10:77872083-77872305   | N_Shore            |
| cg15620905 | chr1  | 44024150  | <i>PTPRF</i>     |                           | OpenSea            |
| cg06902698 | chr1  | 151137676 | <i>SCNMI</i>     |                           | OpenSea            |
| cg16443812 | chr22 | 50987294  | <i>KLHDC7B</i>   | chr22:50984972-50988141   | Island             |
| cg26858144 | chr19 | 54466702  | <i>CACNG8</i>    | chr19:54466357-54466725   | Island             |
| cg25073708 | chr9  | 132083538 | <i>C9orf106</i>  | chr9:132082871-132083582  | Island             |

|            |       |           |                |                           |         |
|------------|-------|-----------|----------------|---------------------------|---------|
| cg01832549 | chr1  | 19774989  | <i>CAPZB</i>   |                           | OpenSea |
| cg24869272 | chr11 | 850296    | <i>TSPAN4</i>  | chr11:849087-850982       | Island  |
| cg00525011 | chr16 | 122031    | <i>RHBDF1</i>  | chr16:122017-122873       | Island  |
| cg05202654 | chr16 | 88706241  | <i>IL17C</i>   | chr16:88706211-88706492   | Island  |
| cg23141851 | chr3  | 14615941  |                | chr3:14615366-14615957    | Island  |
| cg21570209 | chr19 | 46367987  | <i>FOXA3</i>   | chr19:46366202-46366605   | S_Shore |
| cg00873601 | chr12 | 116044025 |                |                           | OpenSea |
| cg19887750 | chr18 | 47813174  | <i>CXXC1</i>   | chr18:47813434-47814546   | N_Shore |
| cg14244402 | chr9  | 130681102 |                | chr9:130679120-130679612  | S_Shore |
| cg08122386 | chr6  | 26195954  |                | chr6:26197070-26197537    | N_Shore |
| cg22828581 | chr9  | 93880502  |                | chr9:93879725-93880618    | Island  |
| cg18385190 | chr14 | 104940369 |                | chr14:104940228-104940466 | Island  |
| cg05507459 | chr9  | 91148748  | <i>NXNL2</i>   | chr9:91149945-91150648    | N_Shore |
| cg19721065 | chr12 | 113549986 | <i>RASAL1</i>  | chr12:113549885-113550165 | Island  |
| cg05100067 | chr2  | 2295969   | <i>MYT1L</i>   |                           | OpenSea |
| cg07816074 | chr4  | 8201560   | <i>SH3TC1</i>  |                           | OpenSea |
| cg07588439 | chr2  | 198571554 | <i>MARS2</i>   | chr2:198569911-198570948  | S_Shore |
| cg14653977 | chr9  | 136038692 | <i>GBGT1</i>   | chr9:136038416-136039577  | Island  |
| cg19131476 | chr11 | 64387923  | <i>NRXN2</i>   |                           | OpenSea |
| cg18974224 | chr14 | 105603153 |                | chr14:105603310-105603532 | N_Shore |
| cg02152233 | chr1  | 29189789  | <i>OPRDI</i>   | chr1:29189307-29189952    | Island  |
| cg11499091 | chr17 | 78735302  | <i>RPTOR</i>   |                           | OpenSea |
| cg08498747 | chr17 | 41747669  |                |                           | OpenSea |
| cg06951627 | chr6  | 26196580  |                | chr6:26197070-26197537    | N_Shore |
| cg27539527 | chr7  | 156735656 |                | chr7:156735245-156735665  | Island  |
| cg08157684 | chr1  | 27675934  | <i>SYTL1</i>   | chr1:27675919-27678016    | Island  |
| cg16065768 | chr12 | 114107712 |                |                           | OpenSea |
| cg26679004 | chr10 | 88023135  | <i>GRID1</i>   | chr10:88022640-88023279   | Island  |
| cg08234664 | chr3  | 49170668  | <i>LAMB2</i>   |                           | OpenSea |
| cg02575092 | chr17 | 77100187  | <i>HRNBP3</i>  | chr17:77099995-77100203   | Island  |
| cg16875104 | chr7  | 30635889  | <i>GARS</i>    | chr7:30634124-30635058    | S_Shore |
| cg10036013 | chr7  | 4778839   | <i>FOXK1</i>   |                           | OpenSea |
| cg26038649 | chr1  | 27683501  | <i>MAP3K6</i>  | chr1:27683277-27683590    | Island  |
| cg20956548 | chr19 | 56618060  | <i>ZNF787</i>  | chr19:56615088-56615955   | S_Shelf |
| cg05715492 | chr7  | 98991138  | <i>ARPC1B</i>  | chr7:98990157-98990922    | S_Shore |
| cg04299200 | chr5  | 534332    |                | chr5:535484-535814        | N_Shore |
| cg08182193 | chr14 | 105942243 | <i>CRIP2</i>   | chr14:105940325-105941900 | S_Shore |
| cg13599248 | chr6  | 74364700  | <i>SLC17A5</i> | chr6:74363202-74364006    | S_Shore |
| cg05164926 | chr17 | 7255624   | <i>KCTD11</i>  | chr17:7254622-7255808     | Island  |
| cg01231141 | chr5  | 178692691 | <i>ADAMTS2</i> |                           | OpenSea |
| cg13541527 | chr6  | 31804078  | <i>C6orf48</i> | chr6:31802598-31802823    | S_Shore |
| cg25255429 | chr17 | 74023633  | <i>EVPL</i>    |                           | OpenSea |
| cg06832677 | chr2  | 119976764 |                |                           | OpenSea |
| cg02557179 | chr16 | 32822612  |                | chr16:32822454-32822741   | Island  |
| cg26823666 | chr1  | 228658397 |                | chr1:228658937-228659152  | N_Shore |
| cg27053299 | chr13 | 100548780 | <i>CLYBL</i>   | chr13:100547633-100548911 | Island  |
| cg20698421 | chr2  | 65217623  | <i>SLCIA4</i>  | chr2:65215598-65217212    | S_Shore |
| cg10364115 | chr7  | 2560976   | <i>LFNG</i>    | chr7:2558371-2559967      | S_Shore |
| cg16017144 | chr17 | 77100082  | <i>HRNBP3</i>  | chr17:77099995-77100203   | Island  |
| cg17868694 | chr7  | 100841533 | <i>MOGAT3</i>  | chr7:100845050-100845726  | N_Shelf |
| cg02380135 | chr2  | 149866270 | <i>KIF5C</i>   | chr2:149866654-149866890  | N_Shore |
| cg00497905 | chr11 | 76903183  | <i>MYO7A</i>   |                           | OpenSea |
| cg05620261 | chr19 | 34991070  | <i>WTIP</i>    | chr19:34988748-34988951   | S_Shelf |
| cg12996100 | chr8  | 11470690  |                | chr8:11471014-11471249    | N_Shore |
| cg19392379 | chr10 | 123909426 | <i>TACC2</i>   |                           | OpenSea |
| cg17220161 | chr1  | 203242601 |                | chr1:203242519-203242818  | Island  |
| cg24247537 | chr11 | 457278    | <i>PTDSS2</i>  | chr11:459088-459345       | N_Shore |
| cg02680050 | chr12 | 133179887 |                | chr12:133179886-133180351 | Island  |
| cg26328687 | chr11 | 96076794  | <i>MAML2</i>   |                           | OpenSea |

|            |       |           |                  |                           |         |
|------------|-------|-----------|------------------|---------------------------|---------|
| cg18955367 | chr19 | 49002338  | <i>LMTK3</i>     | chr19:49001748-49003087   | Island  |
| cg08530537 | chr16 | 68014374  | <i>DPEP3</i>     | chr16:68013967-68014545   | Island  |
| cg22523072 | chr1  | 248300255 |                  |                           | OpenSea |
| cg04359915 | chr10 | 101825029 | <i>CPNI</i>      | chr10:101824961-101825186 | Island  |
| cg10555800 | chr1  | 168356606 |                  |                           | OpenSea |
| cg12845268 | chr10 | 63657363  |                  |                           | OpenSea |
| cg24996814 | chr11 | 68417376  |                  |                           | OpenSea |
| cg17740434 | chr2  | 179388064 | <i>MIR548N</i>   |                           | OpenSea |
| cg02548777 | chr6  | 170338826 |                  | chr6:170338214-170339677  | Island  |
| cg19280206 | chr3  | 196694932 | <i>PIGZ</i>      | chr3:196695319-196697065  | N_Shore |
| cg23928920 | chr15 | 92944756  | <i>ST8SIA2</i>   |                           | OpenSea |
| cg09970481 | chr19 | 42379744  | <i>CD79A</i>     |                           | OpenSea |
| cg20744163 | chr10 | 80999841  | <i>ZMIZ1</i>     | chr10:81002109-81003687   | N_Shelf |
| cg16276982 | chr15 | 29968032  |                  | chr15:29967209-29967621   | S_Shore |
| cg08856033 | chr2  | 121280078 |                  | chr2:121279842-121280183  | Island  |
| cg04634427 | chr15 | 27087315  |                  | chr15:27083992-27084222   | S_Shelf |
| cg13842556 | chr10 | 88023243  | <i>GRID1</i>     | chr10:88022640-88023279   | Island  |
| cg03472000 | chr10 | 118084320 | <i>C10orf96</i>  |                           | OpenSea |
| cg01001533 | chr10 | 44184868  |                  | chr10:44185039-44186132   | N_Shore |
| cg02661079 | chr20 | 44829722  | <i>CDH22</i>     | chr20:44829506-44829848   | Island  |
| cg18959207 | chr10 | 18549686  | <i>CACNB2</i>    |                           | OpenSea |
| cg20248611 | chr12 | 34371861  |                  | chr12:34371627-34372304   | Island  |
| cg10800226 | chr5  | 1850261   |                  | chr5:1851342-1851564      | N_Shore |
| cg05348875 | chr2  | 206628625 | <i>NRP2</i>      |                           | OpenSea |
| cg10166889 | chr5  | 61028374  |                  |                           | OpenSea |
| cg05962028 | chr12 | 214000    | <i>IQSEC3</i>    | chr12:213763-214227       | Island  |
| cg18026225 | chr17 | 43198423  | <i>PLCD3</i>     | chr17:43198277-43198773   | Island  |
| cg15108641 | chr10 | 99263320  | <i>UBTD1</i>     | chr10:99257940-99259520   | S_Shelf |
| cg00284153 | chr10 | 135171713 | <i>C10orf125</i> | chr10:135170645-135171954 | Island  |
| cg10848724 | chr12 | 123380878 | <i>VPS37B</i>    | chr12:123380333-123380894 | Island  |
| cg05962511 | chr10 | 102730022 |                  | chr10:102729299-102729710 | S_Shore |
| cg20228731 | chr7  | 130646051 | <i>FLJ43663</i>  |                           | OpenSea |
| cg21908488 | chr17 | 17991580  | <i>DRG2</i>      | chr17:17991080-17991581   | Island  |
| cg14971320 | chr10 | 43699070  | <i>RASGEF1A</i>  | chr10:43697777-43698177   | S_Shore |
| cg02487233 | chr3  | 107810687 | <i>CD47</i>      | chr3:107809375-107810543  | S_Shore |
| cg10003262 | chr17 | 1106589   |                  | chr17:1106812-1107379     | N_Shore |
| cg00466249 | chr17 | 79269884  | <i>SLC38A10</i>  | chr17:79268367-79269467   | S_Shore |
| cg27069188 | chr16 | 285785    | <i>ITFG3</i>     | chr16:284478-285395       | S_Shore |
| cg01912040 | chr17 | 1106553   |                  | chr17:1106812-1107379     | N_Shore |
| cg13809441 | chr6  | 6737631   |                  |                           | OpenSea |
| cg12817436 | chr19 | 1068561   | <i>HMHA1</i>     | chr19:1068438-1068764     | Island  |
| cg00131958 | chr5  | 134073552 | <i>CAMLG</i>     | chr5:134074083-134074494  | N_Shore |
| cg12845975 | chr3  | 62305226  | <i>C3orf14</i>   | chr3:62304514-62304780    | S_Shore |
| cg11380624 | chr12 | 56222881  | <i>DNAJC14</i>   | chr12:56223263-56223598   | N_Shore |
| cg01450228 | chr16 | 27095462  |                  |                           | OpenSea |
| cg06376715 | chr1  | 3634918   | <i>TP73</i>      | chr1:3634633-3635101      | Island  |
| cg04041942 | chr8  | 28747613  | <i>INTS9</i>     | chr8:28748070-28748431    | N_Shore |
| cg11718235 | chr19 | 56915184  | <i>ZNF583</i>    | chr19:56915356-56915856   | N_Shore |
| cg02849695 | chr1  | 159869960 | <i>CCDC19</i>    | chr1:159869901-159870143  | Island  |
| cg04870460 | chr1  | 146644887 | <i>PRKAB2</i>    | chr1:146643470-146644501  | S_Shore |
| cg09851528 | chr11 | 117778029 | <i>TMPRSS13</i>  |                           | OpenSea |
| cg08479073 | chr1  | 207038584 | <i>IL20</i>      |                           | OpenSea |
| cg03547757 | chr20 | 57425515  | <i>GNASAS</i>    | chr20:57426729-57427047   | N_Shore |
| cg13316433 | chr5  | 83140500  |                  |                           | OpenSea |
| cg23634348 | chr4  | 967822    | <i>DGKQ</i>      | chr4:966732-968137        | Island  |
| cg07830134 | chr16 | 1249204   | <i>CACNA1H</i>   | chr16:1248853-1249446     | Island  |
| cg02604095 | chr9  | 32955790  |                  | chr9:32955651-32956278    | Island  |
| cg17379860 | chr11 | 61159602  | <i>TMEM216</i>   | chr11:61159836-61160285   | N_Shore |
| cg20016914 | chr14 | 69263267  | <i>C14orf181</i> | chr14:69259612-69262900   | S_Shore |



|            |       |           |                     |                           |         |
|------------|-------|-----------|---------------------|---------------------------|---------|
| cg23061114 | chr2  | 95540265  | <i>TEKT4</i>        | chr2:95540181-95540715    | Island  |
| cg18591727 | chr10 | 8277320   |                     |                           | OpenSea |
| cg00075920 | chr5  | 177026190 | <i>B4GALT7</i>      | chr5:177026715-177027519  | N_Shore |
| cg24011500 | chr11 | 61049230  | <i>VWCE</i>         |                           | OpenSea |
| cg08044427 | chr2  | 20442131  |                     |                           | OpenSea |
| cg13909895 | chr22 | 51066142  | <i>ARSA</i>         | chr22:51066107-51067051   | Island  |
| cg03506502 | chr4  | 174443567 |                     | chr4:174443365-174443948  | Island  |
| cg17164520 | chr19 | 49540241  | <i>CGB1</i>         |                           | OpenSea |
| cg16316624 | chr11 | 61159649  | <i>TMEM216</i>      | chr11:61159836-61160285   | N_Shore |
| cg27554551 | chr16 | 4421486   | <i>VASN</i>         | chr16:4421642-4422240     | N_Shore |
| cg12974393 | chr11 | 107779099 |                     |                           | OpenSea |
| cg03647724 | chr16 | 10480289  |                     | chr16:10479686-10480254   | S_Shore |
| cg04078980 | chr1  | 228291486 | <i>C1orf35</i>      | chr1:228289669-228291184  | S_Shore |
| cg14820927 | chr18 | 34408166  | <i>C18orf10</i>     | chr18:34408558-34409289   | N_Shore |
| cg08209724 | chr17 | 30677138  | <i>MIR632</i>       | chr17:30677001-30677460   | Island  |
| cg12873476 | chr8  | 142402728 |                     | chr8:142401533-142402494  | S_Shore |
| cg20758593 | chr5  | 169659863 | <i>C5orf58</i>      | chr5:169659830-169660229  | Island  |
| cg13850825 | chr18 | 75998893  |                     | chr18:75998674-75999123   | Island  |
| cg11893552 | chr6  | 168045268 |                     |                           | OpenSea |
| cg21196136 | chr19 | 48432069  | <i>SNAR-C1</i>      |                           | OpenSea |
| cg19327213 | chr19 | 47988783  | <i>KPTN</i>         | chr19:47987329-47987622   | S_Shore |
| cg00142402 | chr17 | 75956190  |                     | chr17:75953890-75955952   | S_Shore |
| cg08378220 | chr11 | 102678779 |                     |                           | OpenSea |
| cg10592521 | chr19 | 1560658   | <i>MEX3D</i>        | chr19:1555539-1556866     | S_Shelf |
| cg13221347 | chr10 | 134062614 | <i>STK32C</i>       |                           | OpenSea |
| cg12078229 | chr19 | 19245687  | <i>TMEM161A</i>     | chr19:19249182-19249443   | N_Shelf |
| cg21218093 | chr20 | 44600160  | <i>ZNF335</i>       | chr20:44599805-44601207   | Island  |
| cg26581886 | chr22 | 17090862  | <i>psiTPTE22</i>    | chr22:17090455-17091224   | Island  |
| cg09313122 | chr11 | 27827916  |                     |                           | OpenSea |
| cg12493439 | chr17 | 22203419  |                     |                           | OpenSea |
| cg00093095 | chr17 | 76481380  | <i>DNAH17</i>       |                           | OpenSea |
| cg11510523 | chr19 | 12306136  |                     | chr19:12305552-12306304   | Island  |
| cg04517524 | chr14 | 94405342  | <i>ASB2</i>         | chr14:94405235-94406170   | Island  |
| cg22256960 | chr15 | 77711686  |                     | chr15:77711625-77712910   | Island  |
| cg23934295 | chr14 | 85995655  | <i>FLRT2</i>        | chr14:85996494-85996958   | N_Shore |
| cg01435791 | chr19 | 4585323   |                     | chr19:4584182-4585172     | S_Shore |
| cg00478479 | chr19 | 40904851  | <i>PRX</i>          | chr19:40904444-40904955   | Island  |
| cg01267709 | chr14 | 23623756  | <i>SLC7A8</i>       |                           | OpenSea |
| cg20306694 | chr12 | 51718251  | <i>BIN2</i>         |                           | OpenSea |
| cg05043349 | chr8  | 65290113  |                     | chr8:65290108-65290946    | Island  |
| cg24346124 | chr19 | 49540073  | <i>CGB1</i>         |                           | OpenSea |
| cg17241310 | chr1  | 91182856  | <i>BARHL2</i>       | chr1:91182509-91182857    | Island  |
| cg22790377 | chr1  | 228291668 | <i>C1orf35</i>      | chr1:228289669-228291184  | S_Shore |
| cg25294185 | chr11 | 65487814  | <i>RNASEH2C</i>     | chr11:65487660-65488348   | Island  |
| cg03731646 | chr18 | 74499372  |                     | chr18:74499316-74499641   | Island  |
| cg06960461 | chr12 | 132950559 |                     |                           | OpenSea |
| cg06026769 | chr12 | 20704492  | <i>PDE3A</i>        | chr12:20704525-20706004   | N_Shore |
| cg27257453 | chr16 | 84096458  | <i>MBTPS1</i>       |                           | OpenSea |
| cg11216554 | chr10 | 124638983 | <i>LOC399815</i>    | chr10:124638743-124639793 | Island  |
| cg03503812 | chr6  | 27357539  | <i>ZNF391</i>       | chr6:27356492-27357020    | S_Shore |
| cg07229500 | chr1  | 143467252 |                     | chr1:143467293-143467675  | N_Shore |
| cg00689340 | chr2  | 74668672  | <i>RTKN</i>         | chr2:74667593-74669403    | Island  |
| cg03662997 | chr11 | 15963027  |                     | chr11:15962882-15963223   | Island  |
| cg00664205 | chr17 | 77397758  | <i>HRNBP3</i>       |                           | OpenSea |
| cg17762073 | chr6  | 34024220  | <i>GRM4</i>         | chr6:34024201-34024457    | Island  |
| cg13287964 | chr18 | 77905751  | <i>LOC100130522</i> | chr18:77905297-77905566   | S_Shore |
| cg13050716 | chr3  | 127416580 | <i>MGLL</i>         |                           | OpenSea |
| cg20713174 | chr2  | 239048352 | <i>KLHL30</i>       | chr2:239048071-239048454  | Island  |
| cg17520215 | chr12 | 100967016 | <i>GAS2L3</i>       | chr12:100967293-100967845 | N_Shore |

|            |       |           |                 |                          |         |
|------------|-------|-----------|-----------------|--------------------------|---------|
| cg25397663 | chr4  | 124622    | <i>ZNF718</i>   | chr4:124332-124841       | Island  |
| cg14392652 | chr17 | 6927424   | <i>BCL6B</i>    | chr17:6925400-6927527    | Island  |
| cg16481667 | chr11 | 70023578  | <i>ANO1</i>     | chr11:70023057-70023304  | S_Shore |
| cg26649251 | chr19 | 44598564  | <i>ZNF224</i>   | chr19:44598374-44598854  | Island  |
| cg12125332 | chr14 | 75536561  | <i>FAM164C</i>  | chr14:75535825-75536376  | S_Shore |
| cg25963505 | chr7  | 135413023 | <i>SLC13A4</i>  |                          | OpenSea |
| cg04584103 | chr14 | 94405267  | <i>ASB2</i>     | chr14:94405235-94406170  | Island  |
| cg06663305 | chr17 | 8095813   |                 | chr17:8092418-8093706    | S_Shelf |
| cg20353001 | chr6  | 1524618   |                 | chr6:1524153-1524543     | S_Shore |
| cg20777656 | chr15 | 22095674  |                 | chr15:22094182-22095519  | S_Shore |
| cg07903023 | chr2  | 239048072 | <i>KLHL30</i>   | chr2:239048071-239048454 | Island  |
| cg18363918 | chr19 | 51829984  | <i>IGLON5</i>   | chr19:51830064-51831145  | N_Shore |
| cg15109207 | chr19 | 48614773  | <i>PLA2G4C</i>  |                          | OpenSea |
| cg12497786 | chr6  | 3849577   | <i>FAM50B</i>   | chr6:3849271-3851048     | Island  |
| cg01993818 | chr14 | 34270437  | <i>NPAS3</i>    | chr14:34268946-34270438  | Island  |
| cg21923770 | chr17 | 1183159   | <i>TUSC5</i>    |                          | OpenSea |
| cg14590369 | chr19 | 18113585  | <i>ARRDC2</i>   | chr19:18111566-18112481  | S_Shore |
| cg11734329 | chr19 | 7460671   | <i>ARHGEF18</i> | chr19:7459779-7460376    | S_Shore |
| cg12135344 | chr1  | 6188120   | <i>CHD5</i>     | chr1:6187743-6188235     | Island  |
| cg02601352 | chr8  | 21640100  | <i>GFRA2</i>    | chr8:21640161-21640365   | N_Shore |
| cg06289138 | chr6  | 33561186  | <i>C6orf227</i> | chr6:33560892-33561189   | Island  |
| cg01621764 | chr19 | 8809175   | <i>ACTL9</i>    | chr19:8807813-8808794    | S_Shore |
| cg00201779 | chr6  | 72131020  | <i>C6orf155</i> | chr6:72129508-72130756   | S_Shore |
| cg21695020 | chr16 | 68014626  | <i>DPEP3</i>    | chr16:68013967-68014545  | S_Shore |
| cg08124399 | chr6  | 74104868  | <i>DDX43</i>    | chr6:74104425-74104878   | Island  |
| cg10631373 | chr1  | 89457642  | <i>RBMXL1</i>   | chr1:89458034-89458604   | N_Shore |
| cg01534423 | chr17 | 18965556  |                 | chr17:18965477-18965728  | Island  |
| cg17395619 | chr19 | 4607540   |                 | chr19:4607079-4607350    | S_Shore |
| cg20678665 | chr21 | 15096010  |                 | chr21:15095651-15096479  | Island  |
| cg16054907 | chr22 | 50706065  | <i>MAPK11</i>   | chr22:50705406-50706553  | Island  |
| cg01517680 | chr16 | 49499006  |                 | chr16:49498889-49499405  | Island  |
| cg19839825 | chr19 | 7616011   | <i>PNPLA6</i>   | chr19:7614785-7615998    | S_Shore |
| cg22478447 | chr2  | 132588170 |                 | chr2:132585112-132588283 | Island  |
| cg14264194 | chr1  | 211652549 | <i>RD3</i>      | chr1:211652306-211652754 | Island  |
| cg27009812 | chr16 | 3062597   | <i>CLDN9</i>    | chr16:3063679-3063981    | N_Shore |
| cg01969701 | chr11 | 69286145  |                 | chr11:69285724-69286479  | Island  |
| cg04752871 | chr2  | 121412432 |                 | chr2:121411983-121412315 | S_Shore |
| cg05816193 | chr6  | 26018127  | <i>HIST1H1A</i> | chr6:26020671-26021125   | N_Shelf |
| cg10197057 | chr1  | 42612518  |                 | chr1:42611485-42611691   | S_Shore |
| cg14836839 | chr17 | 42706084  |                 |                          | OpenSea |
| cg01781662 | chr9  | 132387805 | <i>METTL11A</i> | chr9:132388344-132388748 | N_Shore |
| cg19786602 | chr17 | 7966326   |                 |                          | OpenSea |
| cg25433316 | chr2  | 10197543  | <i>CYS1</i>     |                          | OpenSea |
| cg22807681 | chr5  | 174622933 |                 |                          | OpenSea |
| cg14711997 | chr7  | 150652864 | <i>KCNH2</i>    | chr7:150652807-150653080 | Island  |
| cg25836232 | chr18 | 12306837  | <i>TUBB6</i>    | chr18:12307554-12309043  | N_Shore |
| cg06501295 | chr6  | 147523200 |                 | chr6:147525374-147525848 | N_Shelf |
| cg19846667 | chr14 | 22191856  |                 |                          | OpenSea |
| cg27357306 | chr10 | 63657059  |                 |                          | OpenSea |
| cg01601573 | chr4  | 144256835 | <i>GAB1</i>     | chr4:144256931-144258527 | N_Shore |
| cg26537280 | chr1  | 95699037  | <i>RWDD3</i>    | chr1:95699725-95700142   | N_Shore |
| cg17277199 | chr2  | 24397845  | <i>C2orf84</i>  | chr2:24397645-24398194   | Island  |
| cg01812146 | chr1  | 94704178  | <i>ARHGAP29</i> | chr1:94702690-94703344   | S_Shore |
| cg04800569 | chr19 | 55888003  | <i>TMEM190</i>  | chr19:55889005-55889476  | N_Shore |
| cg20638675 | chr10 | 45374906  |                 |                          | OpenSea |
| cg27384088 | chr6  | 72298275  |                 | chr6:72298274-72298528   | Island  |
| cg12560020 | chr15 | 93823645  |                 |                          | OpenSea |
| cg06286618 | chr16 | 86987702  |                 |                          | OpenSea |
| cg13451000 | chr11 | 60383256  | <i>C11orf64</i> |                          | OpenSea |

|            |       |           |                 |                          |         |
|------------|-------|-----------|-----------------|--------------------------|---------|
| cg02566259 | chr4  | 3043199   |                 | chr4:3043018-3043547     | Island  |
| cg20949342 | chr13 | 20969084  |                 | chr13:20968851-20969220  | Island  |
| cg21198712 | chr9  | 98534327  |                 |                          | OpenSea |
| cg23008871 | chr17 | 45949743  |                 | chr17:45949676-45949885  | Island  |
| cg12243133 | chr11 | 66823616  | <i>RHOD</i>     | chr11:66824118-66824621  | N_Shore |
| cg10697737 | chr19 | 1673498   |                 | chr19:1671995-1672574    | S_Shore |
| cg09362608 | chr4  | 6659805   |                 | chr4:6660372-6660817     | N_Shore |
| cg00337187 | chr6  | 3054716   |                 |                          | OpenSea |
| cg16844333 | chr10 | 89167457  |                 |                          | OpenSea |
| cg00469015 | chr15 | 69744684  | <i>RPLP1</i>    | chr15:69745049-69745746  | N_Shore |
| cg00516481 | chr21 | 44073202  | <i>PDE9A</i>    | chr21:44073201-44074650  | Island  |
| cg24254488 | chr7  | 25991654  |                 | chr7:25990012-25991320   | S_Shore |
| cg02168442 | chr8  | 102236522 |                 | chr8:102236153-102236949 | Island  |
| cg17181653 | chr6  | 144417537 | <i>SF3B5</i>    | chr6:144416219-144416854 | S_Shore |
| cg24168538 | chr4  | 35527016  |                 |                          | OpenSea |
| cg25594486 | chr19 | 51165441  | <i>SHANK1</i>   | chr19:51165249-51165775  | Island  |
| cg23006519 | chr2  | 121223740 | <i>LOC84931</i> |                          | OpenSea |
| cg01120509 | chr16 | 698230    | <i>WDR90</i>    | chr16:698826-700244      | N_Shore |
| cg09465703 | chr16 | 733842    | <i>JMJD8</i>    | chr16:729438-735815      | Island  |
| cg22005401 | chr19 | 18543829  | <i>SSBP4</i>    | chr19:18543828-18549161  | Island  |
| cg09663193 | chr17 | 7486821   | <i>MPDU1</i>    | chr17:7486285-7487431    | Island  |
| cg06931941 | chr17 | 7486770   | <i>MPDU1</i>    | chr17:7486285-7487431    | Island  |
| cg11874331 | chr17 | 7486562   | <i>MPDU1</i>    | chr17:7486285-7487431    | Island  |
| cg12244647 | chr22 | 50737978  | <i>PLXNB2</i>   | chr22:50737809-50738961  | Island  |
| cg13546736 | chr17 | 7486858   | <i>MPDU1</i>    | chr17:7486285-7487431    | Island  |
| cg02617560 | chr8  | 32785757  |                 |                          | OpenSea |
| cg03521774 | chr8  | 81478172  |                 |                          | OpenSea |
| cg06653052 | chr19 | 1275167   | <i>C19orf24</i> | chr19:1274469-1276358    | Island  |
| cg02482603 | chr1  | 174843754 | <i>RABGAP1L</i> |                          | OpenSea |
| cg16009311 | chr8  | 119086762 | <i>EXT1</i>     |                          | OpenSea |
| cg06833564 | chr16 | 4665307   | <i>FAM100A</i>  | chr16:4664006-4666782    | Island  |
| cg18033770 | chr9  | 139259074 | <i>CARD9</i>    | chr9:139257842-139259075 | Island  |
| cg03871267 | chr5  | 67483475  |                 |                          | OpenSea |
| cg16856833 | chr3  | 87138640  |                 | chr3:87138225-87138546   | S_Shore |
| cg11980800 | chr1  | 9748107   | <i>PIK3CD</i>   | chr1:9749295-9750228     | N_Shore |
| cg21330831 | chr6  | 33283092  | <i>ZBTB22</i>   | chr6:33282855-33283196   | Island  |
| cg02213139 | chr1  | 85527754  | <i>WDR63</i>    |                          | OpenSea |
| cg03870261 | chr19 | 2428514   | <i>LMNB2</i>    | chr19:2428349-2428731    | Island  |
| cg10955566 | chr1  | 1003126   |                 | chr1:1002663-1005318     | Island  |
| cg09459982 | chr6  | 33386556  | <i>CUTA</i>     | chr6:33385678-33386262   | S_Shore |
| cg21653641 | chr19 | 49222892  | <i>MAMSTR</i>   | chr19:49223054-49223312  | N_Shore |
| cg13540341 | chr19 | 49222985  | <i>MAMSTR</i>   | chr19:49223054-49223312  | N_Shore |
| cg03464655 | chr2  | 165811982 | <i>SLC38A11</i> |                          | OpenSea |
| cg06505619 | chr16 | 698072    | <i>WDR90</i>    | chr16:698826-700244      | N_Shore |
| cg10404009 | chr19 | 49223845  | <i>MAMSTR</i>   | chr19:49223833-49224276  | Island  |
| cg10599948 | chr19 | 49244571  | <i>IZUMO1</i>   | chr19:49242018-49242962  | S_Shore |
| cg01607625 | chr6  | 32847830  | <i>PPP1R2P1</i> | chr6:32847498-32847846   | Island  |
| cg26343883 | chr2  | 164205032 |                 | chr2:164204740-164205039 | Island  |
| cg22987448 | chr19 | 8591364   | <i>MYO1F</i>    | chr19:8591294-8591842    | Island  |
| cg23995446 | chr19 | 7934807   |                 | chr19:7933263-7934898    | Island  |
| cg18804667 | chr5  | 58883392  | <i>PDE4D</i>    |                          | OpenSea |
| cg09413013 | chr17 | 76137024  | <i>TMC8</i>     | chr17:76136513-76137184  | Island  |
| cg27475923 | chr11 | 63530997  | <i>C11orf95</i> | chr11:63529888-63531834  | Island  |
| cg13526264 | chr6  | 113886304 |                 |                          | OpenSea |
| cg16404106 | chr11 | 86085623  | <i>CCDC81</i>   | chr11:86085693-86086006  | N_Shore |
| cg19878214 | chr5  | 70742551  |                 |                          | OpenSea |
| cg27454064 | chr12 | 64215611  |                 | chr12:64215499-64215990  | Island  |
| cg11334165 | chr5  | 145758782 |                 | chr5:145758569-145758882 | Island  |
| cg01856645 | chr5  | 78365647  | <i>DMGDH</i>    | chr5:78365298-78365711   | Island  |

|            |       |           |                  |                           |         |
|------------|-------|-----------|------------------|---------------------------|---------|
| cg05358404 | chr20 | 62288950  | <i>RTEL1</i>     | chr20:62288941-62290058   | Island  |
| cg27576241 | chr1  | 155034570 | <i>ADAM15</i>    | chr1:155034925-155036578  | N_Shore |
| cg22198044 | chr4  | 2819614   | <i>SH3BP2</i>    | chr4:2819499-2820429      | Island  |
| cg15967501 | chr19 | 49143404  | <i>SEC1</i>      | chr19:49140156-49141131   | S_Shelf |
| cg26209676 | chr19 | 56154382  | <i>ZNF581</i>    | chr19:56154041-56154405   | Island  |
| cg04181892 | chr2  | 54936027  |                  |                           | OpenSea |
| cg16717549 | chr21 | 45705699  | <i>AIRE</i>      | chr21:45705428-45706044   | Island  |
| cg13069100 | chr1  | 155035008 | <i>ADAM15</i>    | chr1:155034925-155036578  | Island  |
| cg20734996 | chr17 | 7234027   | <i>NEURL4</i>    | chr17:7232330-7233151     | S_Shore |
| cg21399832 | chr4  | 117847410 |                  | chr4:117847087-117847522  | Island  |
| cg07716847 | chr16 | 67233549  | <i>ELMO3</i>     | chr16:67233032-67233862   | Island  |
| cg12176783 | chr20 | 62694000  | <i>TCEA2</i>     | chr20:62693942-62695282   | Island  |
| cg12082025 | chr19 | 1064218   | <i>ABCA7</i>     | chr19:1063544-1064265     | Island  |
| cg08941173 | chr11 | 125034971 | <i>PKNOX2</i>    | chr11:125034896-125036426 | Island  |
| cg27168291 | chr6  | 33282997  | <i>ZBTB22</i>    | chr6:33282855-33283196    | Island  |
| cg11921736 | chr3  | 113160437 | <i>WDR52</i>     | chr3:113160299-113160641  | Island  |
| cg21235532 | chr18 | 19476870  |                  | chr18:19476852-19477103   | Island  |
| cg02472291 | chr8  | 67783002  | <i>C8orf45</i>   |                           | OpenSea |
| cg23891273 | chr12 | 102036400 | <i>MYBPC1</i>    | chr12:102036253-102036461 | Island  |
| cg23378165 | chr17 | 9550256   | <i>USP43</i>     | chr17:9548389-9549616     | S_Shore |
| cg16356856 | chr1  | 74663583  | <i>LRR1Q3</i>    | chr1:74663826-74664035    | N_Shore |
| cg16415457 | chr3  | 23713441  |                  |                           | OpenSea |
| cg24602417 | chr8  | 102236283 |                  | chr8:102236153-102236949  | Island  |
| cg08122232 | chr17 | 74100132  | <i>EXOC7</i>     | chr17:74099738-74100055   | S_Shore |
| cg25043559 | chr18 | 12948780  | <i>SEH1L</i>     | chr18:12947924-12948654   | S_Shore |
| cg22040809 | chr6  | 26522578  | <i>HCG11</i>     | chr6:26521947-26522579    | Island  |
| cg18605031 | chr3  | 49314155  | <i>C3orf62</i>   | chr3:49314437-49314815    | N_Shore |
| cg15352671 | chr11 | 1331497   | <i>LOC255512</i> | chr11:1330390-1331498     | Island  |
| cg20318748 | chr20 | 25605178  | <i>NANP</i>      | chr20:25603815-25605187   | Island  |
| cg13951491 | chr1  | 45793032  | <i>HPDL</i>      | chr1:45792419-45793301    | Island  |
| cg03614916 | chr18 | 22007271  | <i>IMPACT</i>    | chr18:22006310-22007007   | S_Shore |
| cg23725986 | chr2  | 75938438  | <i>C2orf3</i>    | chr2:75937657-75938139    | S_Shore |
| cg12924095 | chr5  | 151150029 | <i>G3BP1</i>     | chr5:151150014-151152086  | Island  |
| cg06638811 | chr9  | 137030555 | <i>RNU6ATAC</i>  | chr9:137028717-137030556  | Island  |
| cg08962798 | chr5  | 179106333 | <i>CBY3</i>      | chr5:179105169-179106412  | Island  |
| cg06480265 | chr6  | 24722060  |                  | chr6:24720387-24721920    | S_Shore |
| cg09159285 | chr1  | 6664134   | <i>KLHL21</i>    | chr1:6661776-6663844      | S_Shore |
| cg14611683 | chr1  | 45452580  | <i>EIF2B3</i>    | chr1:45452037-45452444    | S_Shore |
| cg18407136 | chr15 | 83681092  | <i>C15orf40</i>  | chr15:83680007-83680532   | S_Shore |
| cg08602346 | chr13 | 113242997 | <i>TUBGCP3</i>   | chr13:113241711-113241925 | S_Shore |
| cg14593033 | chr17 | 56296980  | <i>MKS1</i>      | chr17:56296488-56296842   | S_Shore |
| cg12065943 | chr17 | 19881925  | <i>AKAP10</i>    | chr17:19883325-19883610   | N_Shore |
| cg23373640 | chr14 | 65696480  |                  |                           | OpenSea |
| cg05465916 | chr17 | 7819762   | <i>LOC284023</i> | chr17:7818938-7819763     | Island  |
| cg01039401 | chr12 | 3070406   | <i>TEAD4</i>     | chr12:3067960-3069444     | S_Shore |
| cg06975979 | chr7  | 150020025 | <i>LRRC61</i>    | chr7:150019950-150020752  | Island  |
| cg21498471 | chr19 | 33183713  | <i>NUDT19</i>    | chr19:33182609-33183562   | S_Shore |
| cg18427905 | chr2  | 232825958 | <i>DIS3L2</i>    | chr2:232826077-232826836  | N_Shore |
| cg10045137 | chr2  | 25383940  | <i>POMC</i>      | chr2:25383939-25384763    | Island  |
| cg10441379 | chr5  | 72793693  | <i>BTF3</i>      | chr5:72794040-72794641    | N_Shore |
| cg23915527 | chr1  | 161368787 |                  | chr1:161368863-161369932  | N_Shore |
| cg14870223 | chr3  | 39093076  | <i>WDR48</i>     | chr3:39093469-39094025    | N_Shore |
| cg06868955 | chr12 | 54069197  | <i>ATP5G2</i>    | chr12:54069625-54070177   | N_Shore |
| cg13430552 | chr2  | 25427652  |                  | chr2:25427101-25427577    | S_Shore |
| cg14576824 | chr1  | 213224402 | <i>RPS6KC1</i>   | chr1:213224611-213224867  | N_Shore |
| cg01404873 | chr13 | 50701050  | <i>DLEU2</i>     | chr13:50697984-50702286   | Island  |
| cg06939851 | chr1  | 226112534 | <i>PYCR2</i>     | chr1:226111642-226112552  | Island  |
| cg04220541 | chr8  | 48172992  | <i>KIAA0146</i>  | chr8:48172791-48172993    | Island  |
| cg10105237 | chr8  | 135726091 | <i>ZFAT</i>      | chr8:135724770-135725552  | S_Shore |

|            |       |           |                  |                           |         |
|------------|-------|-----------|------------------|---------------------------|---------|
| cg26751513 | chr16 | 1542910   | <i>TELO2</i>     | chr16:1543098-1544426     | N_Shore |
| cg24435209 | chr22 | 17640972  | <i>CECR5</i>     | chr22:17639481-17640714   | S_Shore |
| cg18829411 | chr21 | 40722023  | <i>HMGNI</i>     | chr21:40720185-40721625   | S_Shore |
| cg12265130 | chr11 | 59437344  | <i>PATL1</i>     | chr11:59436201-59437232   | S_Shore |
| cg12151328 | chr3  | 112709521 | <i>GTPBP8</i>    | chr3:112709666-112710270  | N_Shore |
| cg14959908 | chr20 | 2736884   | <i>EBF4</i>      | chr20:2732746-2733630     | S_Shelf |
| cg03456393 | chr3  | 193310565 | <i>OPA1</i>      | chr3:193310824-193311188  | N_Shore |
| cg03804621 | chr10 | 124638756 | <i>FAM24B</i>    | chr10:124638743-124639793 | Island  |
| cg26312542 | chr11 | 112038104 | <i>TEX12</i>     |                           | OpenSea |
| cg00373499 | chr5  | 137224723 | <i>PKD2L2</i>    | chr5:137224986-137225477  | N_Shore |
| cg04861271 | chr14 | 23789531  | <i>PABPN1</i>    | chr14:23790212-23790659   | N_Shore |
| cg05072008 | chr7  | 50518647  | <i>FIGNLI</i>    | chr7:50517627-50518668    | Island  |
| cg08558340 | chr7  | 100472263 | <i>SRRT</i>      | chr7:100472375-100473393  | N_Shore |
| cg15661865 | chr2  | 27632926  | <i>PPM1G</i>     | chr2:27631884-27632822    | S_Shore |
| cg13028113 | chr5  | 60458778  | <i>C5orf43</i>   | chr5:60457840-60458654    | S_Shore |
| cg14307853 | chr9  | 91924749  | <i>CKS2</i>      | chr9:91925372-91926639    | N_Shore |
| cg10432947 | chr4  | 2062441   | <i>NAT8L</i>     | chr4:2059928-2063181      | Island  |
| cg17055585 | chr5  | 25190850  |                  | chr5:25190503-25191113    | Island  |
| cg22993195 | chr3  | 49756301  | <i>AMIGO3</i>    | chr3:49755763-49757317    | Island  |
| cg05868531 | chr2  | 232348602 |                  | chr2:232348216-232348866  | Island  |
| cg22189786 | chr22 | 42395067  | <i>WBP2NL</i>    | chr22:42394589-42395255   | Island  |
| cg16740427 | chr22 | 42469976  | <i>FAM109B</i>   | chr22:42470035-42470669   | N_Shore |
| cg25825627 | chr12 | 127631198 |                  | chr12:127630511-127631199 | Island  |
| cg14625636 | chr9  | 100000026 | <i>KIAA1529</i>  | chr9:100000463-100000820  | N_Shore |
| cg01290153 | chr19 | 55987415  | <i>ZNF628</i>    | chr19:55987544-55988171   | N_Shore |
| cg26440467 | chr8  | 145654605 | <i>VPS28</i>     | chr8:145654517-145654810  | Island  |
| cg16245698 | chr18 | 43355989  |                  | chr18:43355318-43355698   | S_Shore |
| cg04036182 | chr15 | 45458818  |                  | chr15:45458801-45459580   | Island  |
| cg11367159 | chr12 | 110044531 |                  |                           | OpenSea |
| cg05950212 | chr1  | 149860711 | <i>HIST2H2AB</i> | chr1:149857769-149859470  | S_Shore |
| cg05742863 | chr22 | 45809319  | <i>SMC1B</i>     | chr22:45809191-45809953   | Island  |
| cg17545182 | chr1  | 247694041 | <i>LOC148824</i> | chr1:247694035-247694501  | Island  |
| cg12403142 | chr1  | 92012408  |                  | chr1:92012336-92012656    | Island  |
| cg20744362 | chr22 | 50050164  | <i>C22orf34</i>  |                           | OpenSea |
| cg11724970 | chr7  | 27182493  | <i>HOXA5</i>     | chr7:27182613-27185562    | N_Shore |
| cg20974609 | chr7  | 27181671  | <i>HOXA5</i>     | chr7:27182613-27185562    | N_Shore |
| cg23454797 | chr7  | 27183990  | <i>HOXA5</i>     | chr7:27182613-27185562    | Island  |
| cg09343092 | chr7  | 27185282  | <i>HOXA6</i>     | chr7:27182613-27185562    | Island  |
| cg03368099 | chr7  | 27184521  | <i>HOXA5</i>     | chr7:27182613-27185562    | Island  |
| cg17432857 | chr7  | 27184438  | <i>HOXA5</i>     | chr7:27182613-27185562    | Island  |
| cg20517050 | chr7  | 27183806  | <i>HOXA5</i>     | chr7:27182613-27185562    | Island  |
| cg05928186 | chr7  | 27187102  | <i>HOXA6</i>     | chr7:27186927-27187692    | Island  |
| cg23129930 | chr7  | 27186993  | <i>HOXA6</i>     | chr7:27186927-27187692    | Island  |
| cg05579037 | chr7  | 27184853  |                  | chr7:27182613-27185562    | Island  |
| cg09650488 | chr7  | 1687007   |                  | chr7:1686716-1687008      | Island  |
| cg27151303 | chr7  | 27184821  |                  | chr7:27182613-27185562    | Island  |
| cg14853974 | chr17 | 8218887   | <i>ARHGEF15</i>  |                           | OpenSea |
| cg04635635 | chr15 | 30163726  |                  |                           | OpenSea |
| cg02341556 | chr11 | 118781978 | <i>BCL9L</i>     | chr11:118781060-118781732 | S_Shore |
| cg01687997 | chr7  | 1083072   | <i>C7orf50</i>   | chr7:1084387-1084595      | N_Shore |
| cg04265576 | chr7  | 27187372  | <i>HOXA6</i>     | chr7:27186927-27187692    | Island  |
| cg07278425 | chr7  | 27137922  |                  | chr7:27135342-27136736    | S_Shore |
| cg23256343 | chr15 | 30163825  |                  |                           | OpenSea |
| cg05612279 | chr12 | 52241471  |                  | chr12:52240772-52242547   | Island  |
| cg10601100 | chr3  | 64085148  | <i>PRICKLE2</i>  |                           | OpenSea |
| cg03529432 | chr7  | 27187502  | <i>HOXA6</i>     | chr7:27186927-27187692    | Island  |
| cg24460369 | chr12 | 109549041 |                  | chr12:109548899-109549174 | Island  |
| cg07441944 | chr11 | 44623459  | <i>CD82</i>      |                           | OpenSea |
| cg24168308 | chr21 | 27372387  | <i>APP</i>       |                           | OpenSea |

|            |       |           |                  |                           |         |
|------------|-------|-----------|------------------|---------------------------|---------|
| cg08319974 | chr6  | 164506861 |                  |                           | OpenSea |
| cg20370909 | chr7  | 4859229   | <i>RADIL</i>     | chr7:4855990-4856212      | S_Shelf |
| cg17461234 | chr12 | 133373022 | <i>GOLGA3</i>    | chr12:133369195-133370290 | S_Shelf |
| cg04226804 | chr1  | 16556249  |                  | chr1:16553326-16553660    | S_Shelf |
| cg25694032 | chr6  | 164507164 |                  |                           | OpenSea |
| cg11246938 | chr12 | 115112433 | <i>TBX3</i>      | chr12:115112014-115112627 | Island  |
| cg08380478 | chr10 | 132683454 |                  |                           | OpenSea |
| cg12444411 | chr7  | 2802554   | <i>GNA12</i>     | chr7:2802440-2802698      | Island  |
| cg20710519 | chr5  | 6775909   |                  |                           | OpenSea |
| cg03607916 | chr2  | 58478696  |                  | chr2:58478734-58478938    | N_Shore |
| cg10651121 | chr12 | 109549097 |                  | chr12:109548899-109549174 | Island  |
| cg04053108 | chr12 | 6166028   | <i>VWF</i>       | chr12:6165941-6166257     | Island  |
| cg10482201 | chr16 | 3493423   | <i>ZNF597</i>    | chr16:3493098-3493569     | Island  |
| cg24095222 | chr5  | 161178787 |                  |                           | OpenSea |
| cg16278496 | chr14 | 98444476  | <i>C14orf64</i>  |                           | OpenSea |
| cg00232832 | chr15 | 30163660  |                  |                           | OpenSea |
| cg27365295 | chr16 | 1483170   |                  | chr16:1482551-1483201     | Island  |
| cg08959039 | chr13 | 111062266 | <i>COL4A2</i>    |                           | OpenSea |
| cg13713522 | chr8  | 141109051 | <i>TRAPPC9</i>   | chr8:141107837-141110984  | Island  |
| cg11874426 | chr11 | 118781731 | <i>BCL9L</i>     | chr11:118781060-118781732 | Island  |
| cg23496597 | chr20 | 57463725  | <i>GNAS</i>      | chr20:57463652-57467739   | Island  |
| cg22469274 | chr7  | 27187553  | <i>HOXA6</i>     | chr7:27186927-27187692    | Island  |
| cg23355997 | chr17 | 7154831   | <i>DULLARD</i>   | chr17:7154424-7156126     | Island  |
| cg19163395 | chr17 | 42164433  | <i>HDAC5</i>     |                           | OpenSea |
| cg07593523 | chr5  | 58082800  | <i>RAB3C</i>     |                           | OpenSea |
| cg19254235 | chr13 | 48895173  | <i>RBI</i>       | chr13:48892635-48893857   | S_Shore |
| cg09954631 | chr9  | 94648732  | <i>ROR2</i>      | chr9:94648653-94648964    | Island  |
| cg22872349 | chr15 | 81410745  |                  | chr15:81410715-81411067   | Island  |
| cg00383793 | chr3  | 50488162  | <i>CACNA2D2</i>  |                           | OpenSea |
| cg14660024 | chr17 | 7154518   | <i>C17orf81</i>  | chr17:7154424-7156126     | Island  |
| cg06388363 | chr6  | 164507305 |                  |                           | OpenSea |
| cg02088785 | chr13 | 99223336  | <i>STK24</i>     |                           | OpenSea |
| cg03906434 | chr7  | 27231819  |                  | chr7:27231805-27233097    | Island  |
| cg03395546 | chr19 | 41222599  | <i>ADCK4</i>     | chr19:41222598-41223162   | Island  |
| cg22755142 | chr2  | 16243377  |                  |                           | OpenSea |
| cg06495710 | chr2  | 167449521 |                  |                           | OpenSea |
| cg14160422 | chr19 | 10735548  | <i>SLC44A2</i>   | chr19:10735999-10736396   | N_Shore |
| cg23712970 | chr14 | 23540735  | <i>ACIN1</i>     |                           | OpenSea |
| cg15942979 | chr8  | 22497061  | <i>BIN3</i>      |                           | OpenSea |
| cg02324835 | chr8  | 28919075  |                  |                           | OpenSea |
| cg14614581 | chr10 | 73844130  | <i>SPOCK2</i>    | chr10:73846806-73848233   | N_Shelf |
| cg01156816 | chr4  | 132984152 |                  |                           | OpenSea |
| cg22040889 | chr11 | 64073594  | <i>ESRRA</i>     | chr11:64072064-64073914   | Island  |
| cg01748573 | chr20 | 57463530  | <i>GNAS</i>      | chr20:57463652-57467739   | N_Shore |
| cg01320698 | chr1  | 9788517   | <i>PIK3CD</i>    | chr1:9790292-9790704      | N_Shore |
| cg16522260 | chr11 | 114958426 |                  |                           | OpenSea |
| cg20337103 | chr11 | 118781778 | <i>BCL9L</i>     | chr11:118781060-118781732 | S_Shore |
| cg01368900 | chr3  | 13113959  | <i>IQSEC1</i>    | chr3:13114627-13115245    | N_Shore |
| cg23198262 | chr14 | 22978073  |                  |                           | OpenSea |
| cg13138954 | chr15 | 22546672  |                  | chr15:22545218-22547291   | Island  |
| cg22989533 | chr13 | 82264223  |                  |                           | OpenSea |
| cg10543953 | chr15 | 35529612  | <i>LOC723972</i> |                           | OpenSea |
| cg02478023 | chr19 | 57351322  | <i>MIMT1</i>     | chr19:57351283-57351995   | Island  |
| cg16059991 | chr15 | 99975470  |                  |                           | OpenSea |
| cg07659054 | chr7  | 27134225  | <i>HOXA1</i>     | chr7:27134097-27134303    | Island  |
| cg09677938 | chr13 | 23423308  |                  | chr13:23422687-23422896   | S_Shore |
| cg08867825 | chr1  | 102312608 | <i>OLFM3</i>     |                           | OpenSea |
| cg05637296 | chr17 | 76129475  | <i>TMCS8</i>     | chr17:76127521-76128406   | S_Shore |
| cg01525879 | chr11 | 67207498  | <i>CORO1B</i>    | chr11:67203319-67203662   | S_Shelf |

|            |       |           |                    |                           |         |
|------------|-------|-----------|--------------------|---------------------------|---------|
| cg27376514 | chr17 | 17058422  | <i>MPRIIP</i>      | chr17:17061857-17062186   | N_Shelf |
| cg18751141 | chr7  | 27138173  |                    | chr7:27135342-27136736    | S_Shore |
| cg10046893 | chr14 | 101456920 | <i>SNORD114-30</i> |                           | OpenSea |
| cg08884752 | chr1  | 2162001   | <i>SKI</i>         | chr1:2158212-2161173      | S_Shore |
| cg03431524 | chr7  | 100142441 | <i>AGFG2</i>       |                           | OpenSea |
| cg20918563 | chr3  | 196263520 |                    |                           | OpenSea |
| cg07512258 | chr10 | 75619420  | <i>CAMK2G</i>      |                           | OpenSea |
| cg14192130 | chr6  | 167535764 | <i>CCR6</i>        |                           | OpenSea |
| cg21417130 | chr1  | 19400922  |                    |                           | OpenSea |
| cg14506192 | chr12 | 122711988 | <i>DIABLO</i>      | chr12:122710054-122711371 | S_Shore |
| cg20988098 | chr6  | 157931791 | <i>ZDHHC14</i>     |                           | OpenSea |
| cg07757252 | chr3  | 52274561  | <i>TWF2</i>        | chr3:52272839-52273631    | S_Shore |
| cg00537673 | chr6  | 43141823  | <i>SRF</i>         | chr6:43142013-43142217    | N_Shore |
| cg02340818 | chr8  | 145808436 | <i>KIAA1688</i>    | chr8:145806258-145806713  | S_Shore |
| cg16265553 | chr1  | 226911669 | <i>ITPKB</i>       |                           | OpenSea |
| cg22471075 | chr22 | 49765229  |                    | chr22:49764995-49765272   | Island  |
| cg26374305 | chr14 | 101293856 | <i>MEG3</i>        | chr14:101293427-101294433 | Island  |
| cg16880946 | chr7  | 27188465  | <i>HOXA6</i>       | chr7:27190274-27191115    | N_Shore |
| cg22859054 | chr6  | 32847548  | <i>PPP1R2P1</i>    | chr6:32847498-32847846    | Island  |
| cg27500647 | chr19 | 51602230  | <i>CTUI</i>        | chr19:51601822-51602260   | Island  |
| cg15655154 | chr3  | 113604241 | <i>GRAMD1C</i>     | chr3:113603863-113604246  | Island  |
| cg08446215 | chr11 | 2721366   | <i>KCNQ1OT1</i>    | chr11:2720410-2722087     | Island  |
| cg01010328 | chr1  | 156551873 | <i>TTC24</i>       |                           | OpenSea |
| cg01424562 | chr14 | 69256677  | <i>ZFP36L1</i>     | chr14:69256676-69257036   | Island  |
| cg14179389 | chr1  | 92947961  | <i>GFI1</i>        | chr1:92945907-92952609    | Island  |
| cg21106946 | chr13 | 65533500  |                    |                           | OpenSea |
| cg05346902 | chr19 | 47910374  | <i>MEIS3</i>       | chr19:47910107-47910563   | Island  |
| cg08145373 | chr11 | 2407008   | <i>CD81</i>        | chr11:2406711-2406927     | S_Shore |
| cg06313676 | chr16 | 87978974  |                    |                           | OpenSea |
| cg24437859 | chr12 | 7066614   | <i>PTPN6</i>       |                           | OpenSea |
| cg05321594 | chr8  | 330175    |                    |                           | OpenSea |
| cg02317251 | chr4  | 10116515  | <i>WDR1</i>        | chr4:10117575-10118952    | N_Shore |
| cg21705506 | chr17 | 33842181  | <i>SLFN12L</i>     |                           | OpenSea |
| cg25550279 | chr7  | 53254983  |                    | chr7:53254982-53255204    | Island  |
| cg17220933 | chr1  | 206729613 | <i>RASSF5</i>      | chr1:206730397-206730908  | N_Shore |
| cg21463790 | chr7  | 14025907  | <i>ETV1</i>        | chr7:14029378-14029593    | N_Shelf |
| cg04042333 | chr17 | 1104665   |                    | chr17:1106812-1107379     | N_Shelf |
| cg20062691 | chr1  | 949392    | <i>ISG15</i>       | chr1:949329-949851        | Island  |
| cg18138400 | chr11 | 64073849  | <i>ESRRA</i>       | chr11:64072064-64073914   | Island  |
| cg07899411 | chr12 | 123604434 |                    |                           | OpenSea |
| cg23511824 | chr14 | 54816172  |                    |                           | OpenSea |
| cg06666376 | chr19 | 3480596   | <i>C19orf77</i>    | chr19:3481782-3482048     | N_Shore |
| cg19655952 | chr7  | 114055204 | <i>FOXP2</i>       |                           | OpenSea |
| cg08659421 | chr16 | 3117862   | <i>IL32</i>        |                           | OpenSea |
| cg14658607 | chr2  | 139660341 |                    | chr2:139660186-139660395  | Island  |
| cg09016797 | chr7  | 155790956 |                    |                           | OpenSea |
| cg08169020 | chr14 | 69256888  | <i>ZFP36L1</i>     | chr14:69256676-69257036   | Island  |
| cg09107344 | chr12 | 53612734  | <i>RARG</i>        | chr12:53613716-53615103   | N_Shore |
| cg25198255 | chr10 | 134878094 |                    | chr10:134876330-134878539 | Island  |
| cg17995557 | chr10 | 126289971 | <i>LHPP</i>        |                           | OpenSea |
| cg17282688 | chr1  | 11516947  |                    |                           | OpenSea |
| cg00367649 | chr3  | 66702975  |                    |                           | OpenSea |
| cg21565496 | chr13 | 40762150  |                    |                           | OpenSea |
| cg17001153 | chr1  | 206742216 | <i>RASSF5</i>      |                           | OpenSea |
| cg08883853 | chr7  | 1026168   | <i>CYP2W1</i>      | chr7:1026167-1026395      | Island  |
| cg02519218 | chr12 | 133424286 | <i>CHFR</i>        |                           | OpenSea |
| cg23901967 | chr17 | 36890321  | <i>CISD3</i>       | chr17:36886108-36886525   | S_Shelf |
| cg00106345 | chr7  | 27138396  |                    | chr7:27135342-27136736    | S_Shore |
| cg23629187 | chr8  | 125576109 | <i>MTSS1</i>       |                           | OpenSea |

|            |       |           |                  |                           |         |
|------------|-------|-----------|------------------|---------------------------|---------|
| cg08196561 | chr16 | 87525539  | <i>ZCCHC14</i>   |                           | OpenSea |
| cg00689612 | chr17 | 76899627  | <i>TIMP2</i>     | chr17:76897078-76897298   | S_Shelf |
| cg22459924 | chr19 | 2607850   | <i>GNG7</i>      | chr19:2607725-2607967     | Island  |
| cg12756527 | chr10 | 11284548  | <i>CUGBP2</i>    |                           | OpenSea |
| cg05066096 | chr7  | 4781872   | <i>FOXK1</i>     | chr7:4784820-4785058      | N_Shelf |
| cg01490040 | chr2  | 151399444 |                  |                           | OpenSea |
| cg10782923 | chr12 | 56329731  | <i>DGKA</i>      | chr12:56329518-56329790   | Island  |
| cg11374834 | chr3  | 75263691  |                  |                           | OpenSea |
| cg15526535 | chr1  | 12238546  | <i>TNFRSF1B</i>  |                           | OpenSea |
| cg17922695 | chr17 | 75451809  | <i>42987</i>     | chr17:75447477-75447821   | S_Shelf |
| cg01246390 | chr12 | 9392651   |                  | chr12:9392459-9392686     | Island  |
| cg16222326 | chr8  | 1708438   |                  | chr8:1711234-1712654      | N_Shelf |
| cg11733958 | chr17 | 17023057  | <i>MPRIIP</i>    |                           | OpenSea |
| cg02082843 | chr14 | 92339595  | <i>FBLN5</i>     |                           | OpenSea |
| cg16265859 | chr1  | 19401069  | <i>UBR4</i>      |                           | OpenSea |
| cg26103719 | chr14 | 92336250  | <i>FBLN5</i>     |                           | OpenSea |
| cg02668248 | chr19 | 16437789  | <i>KLF2</i>      | chr19:16435202-16438064   | Island  |
| cg06201717 | chr1  | 2949633   |                  |                           | OpenSea |
| cg05932042 | chr17 | 40822653  | <i>PLEKHH3</i>   | chr17:40821935-40823573   | Island  |
| cg16898066 | chr6  | 25726437  | <i>HIST1H2BA</i> | chr6:25726454-25726722    | N_Shore |
| cg05541267 | chr3  | 50647374  | <i>CISH</i>      | chr3:50648939-50649829    | N_Shore |
| cg13390570 | chr5  | 1255616   | <i>TERT</i>      | chr5:1256968-1257222      | N_Shore |
| cg21422623 | chr1  | 226912213 | <i>ITPKB</i>     |                           | OpenSea |
| cg02640489 | chr2  | 219153935 | <i>PNKD</i>      | chr2:219156977-219157380  | N_Shelf |
| cg25526001 | chr10 | 85939451  | <i>C10orf99</i>  |                           | OpenSea |
| cg22241838 | chr11 | 60680006  | <i>TMEM109</i>   | chr11:60681552-60682268   | N_Shore |
| cg16349277 | chr4  | 83323642  |                  |                           | OpenSea |
| cg17972213 | chr1  | 101704898 | <i>SIPRI</i>     | chr1:101701785-101702068  | S_Shelf |
| cg21918313 | chr2  | 73496203  | <i>FBXO41</i>    | chr2:73495920-73496910    | Island  |
| cg24231380 | chr2  | 242813914 | <i>C2orf85</i>   | chr2:242815056-242815599  | N_Shore |
| cg08978665 | chr16 | 3115707   | <i>IL32</i>      |                           | OpenSea |
| cg16235962 | chr11 | 118754507 | <i>CXCR5</i>     |                           | OpenSea |
| cg00589791 | chr5  | 30429329  |                  |                           | OpenSea |
| cg25382214 | chr1  | 3105252   | <i>PRDM16</i>    | chr1:3104956-3105253      | Island  |
| cg14843920 | chr17 | 75451932  | <i>42987</i>     |                           | OpenSea |
| cg22572362 | chr5  | 501938    | <i>SLC9A3</i>    | chr5:501835-502075        | Island  |
| cg01984743 | chr5  | 172751331 | <i>STC2</i>      | chr5:172754056-172757098  | N_Shelf |
| cg15607708 | chr19 | 54041308  | <i>ZNF331</i>    | chr19:54040812-54041857   | Island  |
| cg15079934 | chr11 | 1892307   | <i>LSP1</i>      | chr11:1892037-1892556     | Island  |
| cg03690763 | chr11 | 133734501 |                  | chr11:133734701-133735164 | N_Shore |
| cg25278298 | chr4  | 1305282   | <i>MAEA</i>      | chr4:1303490-1303835      | S_Shore |
| cg26146569 | chr15 | 31637592  | <i>KLF13</i>     |                           | OpenSea |
| cg08059678 | chr16 | 70728425  | <i>VAC14</i>     |                           | OpenSea |
| cg04387073 | chr6  | 165415258 |                  |                           | OpenSea |
| cg04252928 | chr16 | 89168599  | <i>ACSF3</i>     | chr16:89167116-89167482   | S_Shore |
| cg07692540 | chr3  | 38244838  | <i>OXSRI</i>     |                           | OpenSea |
| cg04086531 | chr16 | 49732376  | <i>ZNF423</i>    | chr16:49732348-49732712   | Island  |
| cg12172478 | chr3  | 16357591  | <i>RFTN1</i>     |                           | OpenSea |
| cg01757168 | chr3  | 128215565 |                  | chr3:128215212-128216905  | Island  |
| cg00357958 | chr12 | 123215010 | <i>GPR81</i>     |                           | OpenSea |
| cg02231590 | chr2  | 231737958 | <i>ITM2C</i>     |                           | OpenSea |
| cg08039560 | chr21 | 45575832  |                  | chr21:45575451-45575833   | Island  |
| cg15339435 | chr11 | 128169380 |                  |                           | OpenSea |
| cg11525252 | chr1  | 158041312 | <i>KIRREL</i>    |                           | OpenSea |
| cg09312904 | chr1  | 117281442 |                  | chr1:117284383-117284627  | N_Shelf |
| cg00517080 | chr11 | 134098583 | <i>VPS26B</i>    | chr11:134093696-134095491 | S_Shelf |
| cg09117448 | chr16 | 31439393  | <i>COX6A2</i>    | chr16:31438891-31439682   | Island  |
| cg06517940 | chr1  | 32717620  | <i>LCK</i>       | chr1:32713918-32714186    | S_Shelf |
| cg26888227 | chr10 | 45697308  |                  | chr10:45693718-45694890   | S_Shelf |



|            |       |           |                  |                          |         |
|------------|-------|-----------|------------------|--------------------------|---------|
| cg25323888 | chr6  | 11933336  |                  |                          | OpenSea |
| cg07651189 | chr4  | 88753434  | <i>MEPE</i>      |                          | OpenSea |
| cg04819180 | chr17 | 80829157  | <i>TBCD</i>      | chr17:80829533-80829871  | N_Shore |
| cg00669330 | chr2  | 242810917 | <i>C2orf85</i>   | chr2:242808405-242808618 | S_Shelf |
| cg10963061 | chr1  | 158147729 |                  | chr1:158147433-158147854 | Island  |
| cg01579052 | chr16 | 788035    | <i>NARFL</i>     | chr16:787070-787327      | S_Shore |
| cg19528654 | chr11 | 67251154  | <i>AIP</i>       | chr11:67250344-67250864  | S_Shore |
| cg20997320 | chr21 | 47845610  | <i>PCNT</i>      | chr21:47845595-47845864  | Island  |
| cg01134260 | chr7  | 63924733  |                  | chr7:63924400-63924741   | Island  |
| cg08109681 | chr6  | 166825084 | <i>RPS6KA2</i>   | chr6:166825827-166826439 | N_Shore |
| cg23479730 | chr14 | 99681757  | <i>BCL11B</i>    |                          | OpenSea |
| cg23892025 | chr2  | 63849775  | <i>LOC388955</i> | chr2:63849884-63850164   | N_Shore |
| cg19752602 | chr5  | 153039227 | <i>GRIA1</i>     |                          | OpenSea |
| cg18349306 | chr4  | 146267385 |                  |                          | OpenSea |
| cg05595469 | chr21 | 47845863  | <i>PCNT</i>      | chr21:47845595-47845864  | Island  |
| cg17881200 | chr7  | 27138850  |                  | chr7:27135342-27136736   | S_Shelf |
| cg02284273 | chr10 | 14051679  | <i>FRMD4A</i>    |                          | OpenSea |
| cg10015572 | chr11 | 124071575 |                  |                          | OpenSea |
| cg18350391 | chr16 | 3115552   | <i>IL32</i>      |                          | OpenSea |
| cg05437132 | chr21 | 10990903  | <i>TPTE</i>      | chr21:10989913-10991413  | Island  |
| cg26912105 | chr16 | 84553585  |                  |                          | OpenSea |
| cg12444081 | chr17 | 16521159  |                  | chr17:16520938-16521317  | Island  |
| cg12047941 | chr11 | 315908    |                  | chr11:315739-316539      | Island  |
| cg09163005 | chr12 | 14926986  | <i>H2AFJ</i>     | chr12:14927291-14928023  | N_Shore |
| cg14690181 | chr5  | 115387984 |                  |                          | OpenSea |
| cg16239536 | chr19 | 1079617   | <i>HMHA1</i>     | chr19:1079682-1081937    | N_Shore |
| cg08418872 | chr12 | 6442954   | <i>TNFRSF1A</i>  |                          | OpenSea |
| cg24549912 | chr5  | 50692281  |                  | chr5:50694984-50695352   | N_Shelf |
| cg12077963 | chr17 | 4079306   | <i>ANKFY1</i>    |                          | OpenSea |
| cg23026906 | chr1  | 207819196 | <i>CRIL</i>      | chr1:207818389-207818952 | S_Shore |
| cg07499142 | chr1  | 9788715   | <i>PIK3CD</i>    | chr1:9790292-9790704     | N_Shore |
| cg15997393 | chr7  | 1961869   | <i>MAD1L1</i>    |                          | OpenSea |
| cg01123946 | chr16 | 89163343  | <i>ACSF3</i>     | chr16:89167116-89167482  | N_Shelf |
| cg14378925 | chr11 | 64635728  | <i>EHD1</i>      |                          | OpenSea |
| cg01945624 | chr4  | 8230847   | <i>SH3TC1</i>    |                          | OpenSea |
| cg14085952 | chr9  | 139496844 |                  |                          | OpenSea |
| cg12413156 | chr20 | 62368256  | <i>LIME1</i>     | chr20:62368955-62371962  | N_Shore |
| cg06329392 | chr13 | 40762435  |                  |                          | OpenSea |
| cg22022580 | chr19 | 37266605  |                  | chr19:37266594-37267027  | Island  |
| cg18128536 | chr17 | 47092178  | <i>IGF2BP1</i>   | chr17:47091973-47092211  | Island  |
| cg25607383 | chr6  | 30853569  | <i>DDR1</i>      | chr6:30852102-30852676   | S_Shore |
| cg11227278 | chr2  | 23749277  | <i>KLHL29</i>    | chr2:23749086-23749291   | Island  |
| cg04582263 | chr16 | 67973788  | <i>LCAT</i>      | chr16:67969290-67970418  | S_Shelf |
| cg07970799 | chr6  | 6614719   | <i>LOC285780</i> |                          | OpenSea |
| cg20513976 | chr20 | 62367893  | <i>LIME1</i>     | chr20:62368955-62371962  | N_Shore |
| cg13603599 | chr11 | 67251939  | <i>AIP</i>       | chr11:67250344-67250864  | S_Shore |
| cg16787483 | chr13 | 88328251  | <i>SLITRK5</i>   | chr13:88329394-88329885  | N_Shore |
| cg25225693 | chr7  | 99816988  | <i>GATS</i>      |                          | OpenSea |
| cg25598685 | chr11 | 42617544  |                  |                          | OpenSea |
| cg07637658 | chr19 | 45887042  | <i>PPP1R13L</i>  | chr19:45888768-45889465  | N_Shore |
| cg24741873 | chr10 | 82223998  | <i>TSPAN14</i>   |                          | OpenSea |
| cg18030943 | chr3  | 182876556 | <i>LAMP3</i>     | chr3:182880277-182880722 | N_Shelf |
| cg08006309 | chr16 | 1587810   | <i>IFT140</i>    | chr16:1587683-1587899    | Island  |
| cg01154505 | chr2  | 112940409 | <i>FBLN7</i>     | chr2:112939287-112939563 | S_Shore |
| cg26472802 | chr21 | 45713719  | <i>AIRE</i>      | chr21:45713509-45713813  | Island  |
| cg18338046 | chr5  | 133452188 | <i>TCF7</i>      | chr5:133449320-133451260 | S_Shore |
| cg13750061 | chr11 | 118214845 | <i>CD3G</i>      |                          | OpenSea |
| cg14163311 | chr1  | 206729553 | <i>RASSF5</i>    | chr1:206730397-206730908 | N_Shore |
| cg17709873 | chr6  | 31540456  | <i>LTA</i>       |                          | OpenSea |

|            |       |           |                   |                           |         |
|------------|-------|-----------|-------------------|---------------------------|---------|
| cg09985344 | chr16 | 84648441  | <i>COTL1</i>      | chr16:84650960-84651565   | N_Shelf |
| cg09232358 | chr14 | 23015657  |                   |                           | OpenSea |
| cg13298528 | chr11 | 118763863 | <i>CXCR5</i>      |                           | OpenSea |
| cg02119848 | chr3  | 125826288 | <i>ALDH1L1</i>    |                           | OpenSea |
| cg26348243 | chr6  | 31540461  | <i>LTA</i>        |                           | OpenSea |
| cg02324006 | chr19 | 1080034   | <i>HMHA1</i>      | chr19:1079682-1081937     | Island  |
| cg26752663 | chr2  | 25142016  | <i>ADCY3</i>      | chr2:25142472-25143689    | N_Shore |
| cg20334591 | chr4  | 39775714  | <i>UBE2K</i>      | chr4:39771679-39771944    | S_Shelf |
| cg12033075 | chr1  | 9788767   | <i>PIK3CD</i>     | chr1:9790292-9790704      | N_Shore |
| cg21653586 | chr11 | 10530636  |                   |                           | OpenSea |
| cg24449463 | chr1  | 168025552 | <i>DCAF6</i>      | chr1:168025508-168025722  | Island  |
| cg18799102 | chr3  | 155760037 |                   |                           | OpenSea |
| cg22514722 | chr3  | 127473755 | <i>MGLL</i>       |                           | OpenSea |
| cg06243989 | chr15 | 25425615  | <i>SNORD115-6</i> |                           | OpenSea |
| cg21482472 | chr13 | 81229358  |                   | chr13:81229047-81229445   | Island  |
| cg09549073 | chr7  | 27183274  | <i>HOXA5</i>      | chr7:27182613-27185562    | Island  |
| cg14918744 | chr8  | 23018464  | <i>TNFRSF10D</i>  | chr8:23021056-23021588    | N_Shelf |
| cg24973755 | chr4  | 1304972   | <i>MAEA</i>       | chr4:1304768-1305114      | Island  |
| cg02611934 | chr13 | 88329407  | <i>SLITRK5</i>    | chr13:88329394-88329885   | Island  |
| cg20805133 | chr2  | 242802192 | <i>PDCD1</i>      | chr2:242805752-242806034  | N_Shelf |
| cg03363478 | chr6  | 170268808 |                   |                           | OpenSea |
| cg19529732 | chr12 | 122712101 | <i>DIABLO</i>     | chr12:122710054-122711371 | S_Shore |
| cg21673175 | chr2  | 132202532 | <i>LOC401010</i>  | chr2:132202265-132203257  | Island  |
| cg23743554 | chr11 | 65321226  | <i>LTBP3</i>      | chr11:65321225-65321823   | Island  |
| cg25657218 | chr17 | 22017062  |                   | chr17:22016769-22017189   | Island  |
| cg16385865 | chr12 | 132670412 |                   | chr12:132673993-132675241 | N_Shelf |
| cg18825594 | chr2  | 10184650  | <i>KLF11</i>      | chr2:10182635-10184702    | Island  |
| cg05163268 | chr5  | 180116385 |                   |                           | OpenSea |
| cg04520704 | chr22 | 18325160  | <i>MICAL3</i>     | chr22:18324563-18324788   | S_Shore |
| cg24449629 | chr19 | 52646265  |                   | chr19:52642613-52642841   | S_Shelf |
| cg12827637 | chr14 | 69256791  | <i>ZFP36L1</i>    | chr14:69256676-69257036   | Island  |
| cg06357748 | chr12 | 1025529   | <i>RAD52</i>      |                           | OpenSea |
| cg04006327 | chr11 | 72533487  | <i>ATG16L2</i>    | chr11:72532612-72533774   | Island  |
| cg09757087 | chr16 | 1585644   | <i>IFT140</i>     | chr16:1583809-1584641     | S_Shore |
| cg24616382 | chr7  | 99767035  | <i>GAL3ST4</i>    | chr7:99768884-99769559    | N_Shore |
| cg14356919 | chr21 | 46890997  | <i>COL18A1</i>    | chr21:46890848-46891115   | Island  |
| cg16093065 | chr22 | 40720633  | <i>TNRC6B</i>     |                           | OpenSea |
| cg24331317 | chr3  | 19017607  |                   |                           | OpenSea |
| cg20793665 | chr2  | 232549224 |                   | chr2:232545347-232546143  | S_Shelf |
| cg24723883 | chr19 | 2608495   | <i>GNG7</i>       | chr19:2607725-2607967     | S_Shore |
| cg10325497 | chr1  | 32739049  | <i>LCK</i>        | chr1:32740710-32741544    | N_Shore |
| cg02963266 | chr14 | 99681710  | <i>BCL11B</i>     |                           | OpenSea |
| cg14957089 | chr11 | 331092    |                   | chr11:330785-331110       | Island  |
| cg25569480 | chr2  | 48844892  | <i>GTF2A1L</i>    | chr2:48844751-48844985    | Island  |
| cg19484299 | chr2  | 234775274 | <i>MSL3L2</i>     | chr2:234776882-234777098  | N_Shore |
| cg08329113 | chr16 | 70771142  | <i>VAC14</i>      |                           | OpenSea |
| cg08288818 | chr15 | 55920079  | <i>PRTG</i>       |                           | OpenSea |
| cg11430096 | chr6  | 110968061 | <i>CDK19</i>      | chr6:110967011-110967823  | S_Shore |
| cg17187762 | chr22 | 28070120  |                   | chr22:28073920-28074244   | N_Shelf |
| cg15739904 | chr8  | 125313885 |                   | chr8:125313572-125314097  | Island  |
| cg08466385 | chr6  | 18368294  |                   |                           | OpenSea |
| cg01791634 | chr17 | 76130139  | <i>TMCS8</i>      | chr17:76127521-76128406   | S_Shore |
| cg23939642 | chr17 | 79225757  | <i>SLC38A10</i>   |                           | OpenSea |
| cg11015251 | chr7  | 27170554  | <i>HOXA4</i>      | chr7:27169572-27170638    | Island  |
| cg07114422 | chr1  | 2183438   | <i>SKI</i>        |                           | OpenSea |
| cg27583010 | chr16 | 30198505  | <i>CORO1A</i>     | chr16:30194747-30195357   | S_Shelf |
| cg26821758 | chr2  | 55515029  | <i>CCDC88A</i>    |                           | OpenSea |
| cg19905757 | chr15 | 68924127  | <i>CORO2B</i>     |                           | OpenSea |
| cg14457074 | chr5  | 180408785 |                   |                           | OpenSea |

|            |       |           |                     |                           |         |
|------------|-------|-----------|---------------------|---------------------------|---------|
| cg09390241 | chr4  | 8174148   |                     |                           | OpenSea |
| cg16272981 | chr5  | 1489889   | <i>LPCAT1</i>       | chr5:1489799-1490071      | Island  |
| cg22726349 | chr1  | 2990678   | <i>PRDM16</i>       | chr1:2990030-2990718      | Island  |
| cg14977069 | chr20 | 62367698  | <i>LIME1</i>        | chr20:62368955-62371962   | N_Shore |
| cg25417842 | chr7  | 150822987 | <i>AGAP3</i>        | chr7:150822654-150823387  | Island  |
| cg19933320 | chr7  | 64125401  | <i>ZNF107</i>       | chr7:64126715-64126994    | N_Shore |
| cg08121102 | chr1  | 179805298 |                     |                           | OpenSea |
| cg15656347 | chr5  | 7289734   |                     | chr5:7289733-7290153      | Island  |
| cg17508302 | chr1  | 161575716 | <i>HSPA7</i>        | chr1:161575534-161576908  | Island  |
| cg24704510 | chr17 | 38182512  | <i>MED24</i>        |                           | OpenSea |
| cg22120095 | chr3  | 50488020  | <i>CACNA2D2</i>     |                           | OpenSea |
| cg23768702 | chr18 | 44557673  | <i>TCEB3CL</i>      | chr18:44554879-44556671   | S_Shore |
| cg23570810 | chr11 | 315102    | <i>IFITM1</i>       | chr11:315739-316539       | N_Shore |
| cg20558320 | chr2  | 235210313 |                     |                           | OpenSea |
| cg10302285 | chr4  | 113063260 |                     | chr4:113066470-113067379  | N_Shelf |
| cg20368377 | chr13 | 23499360  |                     | chr13:23500589-23501398   | N_Shore |
| cg23463608 | chr19 | 2607757   | <i>GNG7</i>         | chr19:2607725-2607967     | Island  |
| cg07218880 | chr13 | 115046279 | <i>UPF3A</i>        | chr13:115046754-115048034 | N_Shore |
| cg27276613 | chr11 | 72750477  | <i>FCHSD2</i>       |                           | OpenSea |
| cg00810292 | chr13 | 75900518  | <i>TBC1D4</i>       |                           | OpenSea |
| cg19798735 | chr7  | 110730805 | <i>IMMP2L</i>       |                           | OpenSea |
| cg06257110 | chr16 | 21658497  | <i>METTL9</i>       |                           | OpenSea |
| cg11839415 | chr1  | 43814764  | <i>MPL</i>          | chr1:43814305-43815277    | Island  |
| cg19627093 | chr8  | 1900892   | <i>ARHGEF10</i>     |                           | OpenSea |
| cg22981104 | chr8  | 144255663 |                     |                           | OpenSea |
| cg02256315 | chr11 | 18500649  | <i>LDHAL6A</i>      |                           | OpenSea |
| cg26234900 | chr6  | 32820214  | <i>TAPI</i>         | chr6:32820849-32822370    | N_Shore |
| cg25211348 | chr1  | 111769665 | <i>CHI3L2</i>       |                           | OpenSea |
| cg01367992 | chr1  | 160766535 | <i>LY9</i>          |                           | OpenSea |
| cg11347531 | chr1  | 59090352  |                     |                           | OpenSea |
| cg17093855 | chr17 | 72834959  | <i>TMEM104</i>      | chr17:72838812-72839751   | N_Shelf |
| cg04340595 | chr1  | 9789174   | <i>CLSTN1</i>       | chr1:9790292-9790704      | N_Shore |
| cg09026253 | chr11 | 313267    | <i>IFITM1</i>       | chr11:310728-311419       | S_Shore |
| cg06936108 | chr17 | 7894917   |                     | chr17:7893330-7893702     | S_Shore |
| cg03203197 | chr16 | 34587120  |                     | chr16:34586717-34587124   | Island  |
| cg12754571 | chr1  | 247694271 | <i>LOC148824</i>    | chr1:247694035-247694501  | Island  |
| cg01083549 | chr16 | 89168371  | <i>ACSF3</i>        | chr16:89167116-89167482   | S_Shore |
| cg01132696 | chr6  | 33048558  | <i>HLA-DPB1</i>     | chr6:33048416-33048814    | Island  |
| cg13440692 | chr1  | 1186357   |                     | chr1:1189396-1190245      | N_Shelf |
| cg25170017 | chr11 | 64644487  | <i>EHD1</i>         | chr11:64645429-64646566   | N_Shore |
| cg10859442 | chr11 | 73716367  | <i>UCP3</i>         |                           | OpenSea |
| cg11688093 | chr13 | 111178359 | <i>RAB20</i>        |                           | OpenSea |
| cg02805052 | chr2  | 104973361 |                     |                           | OpenSea |
| cg08597025 | chr21 | 15077096  |                     | chr21:15077051-15077824   | Island  |
| cg27280688 | chr21 | 43823809  | <i>UBASH3A</i>      |                           | OpenSea |
| cg20055861 | chr15 | 68055293  | <i>MAP2K5</i>       |                           | OpenSea |
| cg07212384 | chr7  | 99761053  | <i>GAL3ST4</i>      |                           | OpenSea |
| cg18608055 | chr19 | 1130866   | <i>SBNO2</i>        |                           | OpenSea |
| cg11674355 | chr2  | 65610261  | <i>SPRED2</i>       |                           | OpenSea |
| cg17712928 | chr7  | 2124974   | <i>MAD1L1</i>       |                           | OpenSea |
| cg17394978 | chr5  | 131824502 | <i>IRF1</i>         | chr5:131825842-131826935  | N_Shore |
| cg05201185 | chr6  | 30459139  | <i>HLA-E</i>        | chr6:30457369-30458175    | S_Shore |
| cg17001566 | chr1  | 2990490   | <i>PRDM16</i>       | chr1:2990030-2990718      | Island  |
| cg09847153 | chr1  | 38461540  |                     | chr1:38461584-38461988    | N_Shore |
| cg17461271 | chr1  | 172717683 |                     |                           | OpenSea |
| cg03639671 | chr4  | 145430689 |                     |                           | OpenSea |
| cg03982998 | chr1  | 238024671 | <i>LOC100130331</i> |                           | OpenSea |
| cg16351957 | chr6  | 71874784  |                     |                           | OpenSea |
| cg15787636 | chr17 | 80866113  | <i>TBCD</i>         | chr17:80863327-80863743   | S_Shelf |

|            |       |           |                  |                           |         |
|------------|-------|-----------|------------------|---------------------------|---------|
| cg05830220 | chr16 | 87757033  | <i>KLHDC4</i>    | chr16:87754008-87754285   | S_Shelf |
| cg14113203 | chr9  | 97346942  | <i>FBP2</i>      |                           | OpenSea |
| cg04333867 | chr14 | 24567446  | <i>PCK2</i>      | chr14:24563256-24563886   | S_Shelf |
| cg08714433 | chr4  | 132896736 |                  | chr4:132896360-132896778  | Island  |
| cg03448915 | chr16 | 66583078  | <i>TK2</i>       | chr16:66583236-66584135   | N_Shore |
| cg05347965 | chr17 | 55663256  | <i>MSI2</i>      |                           | OpenSea |
| cg08450017 | chr3  | 45984838  | <i>CXCR6</i>     |                           | OpenSea |
| cg12355172 | chr11 | 67418315  | <i>ACY3</i>      |                           | OpenSea |
| cg24445388 | chr1  | 2084391   | <i>PRKCZ</i>     | chr1:2082314-2082529      | S_Shore |
| cg06208288 | chr1  | 58858074  |                  |                           | OpenSea |
| cg25637655 | chr6  | 29911542  | <i>HLA-A</i>     | chr6:29910202-29911367    | S_Shore |
| cg02891314 | chr5  | 179741120 | <i>GFPT2</i>     | chr5:179740710-179741121  | Island  |
| cg12048225 | chr6  | 32808669  | <i>PSMB8</i>     | chr6:32811494-32811839    | N_Shelf |
| cg05799811 | chr1  | 167487396 | <i>CD247</i>     |                           | OpenSea |
| cg21916358 | chr21 | 15077562  |                  | chr21:15077051-15077824   | Island  |
| cg07318204 | chr4  | 145566441 | <i>HHIP</i>      | chr4:145566242-145567413  | Island  |
| cg16727006 | chr16 | 87470545  | <i>ZCCHC14</i>   |                           | OpenSea |
| cg26768584 | chr3  | 18480242  | <i>SATB1</i>     |                           | OpenSea |
| cg13862711 | chr9  | 124989915 | <i>LHX6</i>      | chr9:124987743-124991086  | Island  |
| cg26313511 | chr3  | 125053815 | <i>ZNF148</i>    |                           | OpenSea |
| cg09362796 | chr4  | 3204792   | <i>HTT</i>       |                           | OpenSea |
| cg01312482 | chr5  | 178451176 | <i>ZNF879</i>    | chr5:178450630-178451216  | Island  |
| cg02932314 | chr17 | 42733698  | <i>C17orf104</i> | chr17:42733486-42734626   | Island  |
| cg03890037 | chr5  | 115297989 | <i>LVRN</i>      | chr5:115297607-115298093  | Island  |
| cg04293259 | chr6  | 30434208  |                  | chr6:30434029-30434422    | Island  |
| cg09257796 | chr15 | 27215971  | <i>GABRG3</i>    | chr15:27215951-27216856   | Island  |
| cg21429394 | chr12 | 100750899 | <i>SLC17A8</i>   |                           | OpenSea |
| cg08513253 | chr6  | 107955362 | <i>SOBP</i>      | chr6:107955163-107956693  | Island  |
| cg12277666 | chr1  | 179560870 | <i>TDRD5</i>     | chr1:179560751-179561596  | Island  |
| cg12076931 | chr9  | 139427171 | <i>NOTCH1</i>    | chr9:139428318-139428527  | N_Shore |
| cg01289544 | chr2  | 27887409  | <i>SUPT7L</i>    | chr2:27886259-27887410    | Island  |
| cg03896611 | chr8  | 99986344  |                  | chr8:99985733-99986983    | Island  |
| cg16621833 | chr6  | 117587588 | <i>VGLL2</i>     | chr6:117586482-117587156  | S_Shore |
| cg20185461 | chr19 | 18899082  | <i>COMP</i>      | chr19:18899037-18902284   | Island  |
| cg20692569 | chr7  | 72848481  | <i>FZD9</i>      | chr7:72847933-72850032    | Island  |
| cg04626491 | chr6  | 28584053  |                  | chr6:28583934-28584289    | Island  |
| cg23193759 | chr10 | 71389896  | <i>C10orf35</i>  | chr10:71389862-71390355   | Island  |
| cg11807105 | chr6  | 28784852  |                  | chr6:28781857-28782302    | S_Shelf |
| cg01889893 | chr1  | 8085193   | <i>ERRF11</i>    | chr1:8085554-8086854      | N_Shore |
| cg07906855 | chr3  | 9642468   |                  | chr3:9642387-9642695      | Island  |
| cg03308652 | chr3  | 62354991  |                  | chr3:62354291-62355012    | Island  |
| cg07465864 | chr5  | 112849162 | <i>YTHDC2</i>    | chr5:112849265-112849982  | N_Shore |
| cg18457731 | chr8  | 139734484 | <i>COL22A1</i>   |                           | OpenSea |
| cg23630442 | chr8  | 18245225  |                  | chr8:18244455-18245226    | Island  |
| cg00986580 | chr14 | 22951241  |                  |                           | OpenSea |
| cg12190994 | chr7  | 4305061   | <i>SDK1</i>      | chr7:4303079-4305062      | Island  |
| cg09862733 | chr19 | 49631106  | <i>PPFIA3</i>    | chr19:49631105-49631494   | Island  |
| cg13932794 | chr14 | 100126196 | <i>HHIPL1</i>    | chr14:100125671-100126694 | Island  |
| cg16178091 | chr5  | 37844401  |                  | chr5:37836747-37840726    | S_Shelf |
| cg13718539 | chr5  | 140801354 | <i>PCDHGA4</i>   | chr5:140802399-140802832  | N_Shore |
| cg07025583 | chr5  | 157078881 | <i>SOX30</i>     | chr5:157078327-157079564  | Island  |
| cg24411302 | chr14 | 74893183  | <i>TMEM90A</i>   | chr14:74892466-74893184   | Island  |
| cg08602008 | chr19 | 48076841  |                  | chr19:48076461-48076877   | Island  |
| cg14064148 | chr19 | 10527576  |                  | chr19:10526982-10527755   | Island  |
| cg21177456 | chr19 | 519611    | <i>C19orf20</i>  | chr19:518847-519905       | Island  |
| cg07852825 | chr3  | 172166182 | <i>GHSR</i>      | chr3:172165372-172166738  | Island  |
| cg15962375 | chr1  | 213563639 |                  | chr1:213562739-213562958  | S_Shore |
| cg20810675 | chr4  | 171604188 |                  |                           | OpenSea |
| cg06358300 | chr9  | 84302344  | <i>TLE1</i>      | chr9:84302139-84305001    | Island  |

|            |       |           |                 |                           |         |
|------------|-------|-----------|-----------------|---------------------------|---------|
| cg24085707 | chr17 | 79615652  | <i>TSPAN10</i>  | chr17:79614850-79615559   | S_Shore |
| cg19137818 | chr3  | 45837556  | <i>SLC6A20</i>  | chr3:45837480-45838256    | Island  |
| cg10304824 | chr2  | 177028804 | <i>HOXD3</i>    | chr2:177029413-177029941  | N_Shore |
| cg12050497 | chr2  | 14773274  | <i>FAM84A</i>   | chr2:14772377-14775809    | Island  |
| cg08623383 | chr1  | 28205926  | <i>C1orf38</i>  |                           | OpenSea |
| cg15009294 | chr1  | 214813712 | <i>CENPF</i>    |                           | OpenSea |
| cg04096767 | chr11 | 32449450  | <i>WT1</i>      | chr11:32448261-32449744   | Island  |
| cg04290586 | chr12 | 108168987 | <i>ASCL4</i>    | chr12:108168986-108169570 | Island  |
| cg25782229 | chr11 | 32450692  | <i>WT1</i>      | chr11:32452144-32452708   | N_Shore |
| cg23553442 | chr9  | 74062096  |                 | chr9:74061513-74062097    | Island  |
| cg19027255 | chr10 | 78943401  | <i>KCNMA1</i>   |                           | OpenSea |
| cg15726426 | chr1  | 111216839 | <i>KCNA3</i>    | chr1:111216244-111217937  | Island  |
| cg10640072 | chr8  | 99985888  |                 | chr8:99985733-99986983    | Island  |
| cg19374779 | chr3  | 138341122 | <i>FAIM</i>     |                           | OpenSea |
| cg15704225 | chr2  | 81427138  |                 |                           | OpenSea |
| cg22835435 | chr19 | 51111185  |                 | chr19:51111184-51111519   | Island  |
| cg23713520 | chr16 | 57318087  | <i>PLLP</i>     | chr16:57317967-57318964   | Island  |
| cg05251389 | chr22 | 43525330  | <i>BIK</i>      |                           | OpenSea |
| cg12289045 | chr19 | 51141361  | <i>SYT3</i>     | chr19:51142284-51142986   | N_Shore |
| cg07472704 | chr13 | 113763758 | <i>F7</i>       | chr13:113761566-113765534 | Island  |
| cg20992319 | chr2  | 225813194 | <i>DOCK10</i>   |                           | OpenSea |
| cg14829814 | chr12 | 108294894 |                 | chr12:108297426-108297743 | N_Shelf |
| cg18105725 | chr6  | 160554003 | <i>SLC22A1</i>  | chr6:160554661-160555504  | N_Shore |
| cg07508429 | chr7  | 44448689  | <i>NUDCD3</i>   |                           | OpenSea |
| cg10424892 | chr12 | 9602245   | <i>DDX12</i>    | chr12:9600415-9601259     | S_Shore |
| cg01353448 | chr7  | 31726912  | <i>C7orf16</i>  |                           | OpenSea |
| cg14905403 | chr17 | 39317349  | <i>KRTAP4-4</i> |                           | OpenSea |
| cg16119505 | chr1  | 97186464  | <i>PTBP2</i>    | chr1:97187102-97187606    | N_Shore |
| cg14299369 | chr15 | 43560165  | <i>TGM5</i>     |                           | OpenSea |
| cg16006141 | chr1  | 25167475  | <i>CLIC4</i>    |                           | OpenSea |
| cg10221391 | chr6  | 29945726  | <i>HCG9</i>     | chr6:29944402-29945169    | S_Shore |
| cg15115365 | chr5  | 88384656  |                 |                           | OpenSea |
| cg10207609 | chr7  | 80267619  | <i>CD36</i>     |                           | OpenSea |
| cg22288927 | chr4  | 144482688 |                 | chr4:144480541-144480947  | S_Shore |
| cg27391117 | chr11 | 89442829  | <i>TRIM77</i>   |                           | OpenSea |
| cg26825569 | chr6  | 46704077  | <i>PLA2G7</i>   | chr6:46702736-46703316    | S_Shore |
| cg21424209 | chr6  | 148792600 | <i>SASH1</i>    |                           | OpenSea |
| cg05753589 | chr1  | 2064765   | <i>PRKCZ</i>    | chr1:2064628-2064855      | Island  |
| cg15136953 | chr3  | 110793466 | <i>PVRL3</i>    | chr3:110790149-110791401  | S_Shelf |
| cg18222192 | chr11 | 79104769  | <i>ODZ4</i>     |                           | OpenSea |
| cg00919055 | chr5  | 149546946 | <i>CDX1</i>     | chr5:149546027-149546988  | Island  |
| cg14625770 | chr9  | 104295276 | <i>RNF20</i>    | chr9:104295917-104296232  | N_Shore |
| cg22109694 | chr15 | 26360852  |                 |                           | OpenSea |
| cg13629358 | chr5  | 160112456 | <i>ATP10B</i>   |                           | OpenSea |
| cg10992558 | chr1  | 95369272  | <i>CNN3</i>     |                           | OpenSea |
| cg14081737 | chr9  | 116111377 | <i>BSPRY</i>    | chr9:116111663-116112189  | N_Shore |

Table S6- Prediction scores generated for methylation data from 60 samples with different blood cell types

| Blood cell | Kabuki | ATRX  | Sotos | CHARGE | Floating Harbor | ADCA-DN | Claes-Jensen | Non 7-disorder |
|------------|--------|-------|-------|--------|-----------------|---------|--------------|----------------|
| WB_1       | 0.002  | 0.002 | 0.002 | 0.002  | 0.003           | 0.001   | 0.002        | 0.987          |
| WB_2       | 0.002  | 0.003 | 0.002 | 0.006  | 0.002           | 0.001   | 0.003        | 0.980          |
| WB_3       | 0.003  | 0.004 | 0.002 | 0.002  | 0.002           | 0.001   | 0.003        | 0.983          |
| WB_4       | 0.002  | 0.002 | 0.002 | 0.001  | 0.002           | 0.001   | 0.002        | 0.990          |
| WB_5       | 0.002  | 0.002 | 0.002 | 0.005  | 0.003           | 0.001   | 0.004        | 0.982          |
| WB_6       | 0.003  | 0.003 | 0.003 | 0.019  | 0.002           | 0.001   | 0.003        | 0.967          |
| PBMC_1     | 0.002  | 0.002 | 0.001 | 0.002  | 0.004           | 0.001   | 0.002        | 0.987          |
| PBMC_2     | 0.001  | 0.002 | 0.002 | 0.002  | 0.002           | 0.001   | 0.003        | 0.987          |
| PBMC_3     | 0.002  | 0.001 | 0.001 | 0.001  | 0.002           | 0.000   | 0.001        | 0.991          |
| PBMC_4     | 0.001  | 0.001 | 0.001 | 0.001  | 0.002           | 0.001   | 0.001        | 0.991          |
| PBMC_5     | 0.001  | 0.001 | 0.001 | 0.002  | 0.002           | 0.001   | 0.002        | 0.990          |
| PBMC_6     | 0.002  | 0.001 | 0.001 | 0.005  | 0.002           | 0.001   | 0.001        | 0.986          |
| Gran_1     | 0.001  | 0.003 | 0.003 | 0.005  | 0.001           | 0.001   | 0.003        | 0.983          |
| Gran_2     | 0.003  | 0.003 | 0.004 | 0.030  | 0.003           | 0.001   | 0.007        | 0.950          |
| Gran_3     | 0.003  | 0.004 | 0.003 | 0.007  | 0.002           | 0.001   | 0.006        | 0.974          |
| Gran_4     | 0.002  | 0.003 | 0.003 | 0.002  | 0.002           | 0.001   | 0.004        | 0.982          |
| Gran_5     | 0.002  | 0.002 | 0.002 | 0.017  | 0.002           | 0.001   | 0.005        | 0.968          |
| Gran_6     | 0.006  | 0.006 | 0.004 | 0.078  | 0.003           | 0.002   | 0.006        | 0.895          |
| CD4+_1     | 0.001  | 0.001 | 0.001 | 0.001  | 0.002           | 0.001   | 0.001        | 0.992          |
| CD4+_2     | 0.001  | 0.001 | 0.001 | 0.001  | 0.002           | 0.000   | 0.001        | 0.994          |
| CD4+_3     | 0.001  | 0.001 | 0.001 | 0.001  | 0.001           | 0.000   | 0.001        | 0.995          |
| CD4+_4     | 0.001  | 0.001 | 0.001 | 0.001  | 0.002           | 0.000   | 0.001        | 0.994          |
| CD4+_5     | 0.001  | 0.001 | 0.000 | 0.001  | 0.003           | 0.001   | 0.001        | 0.993          |
| CD4+_6     | 0.002  | 0.001 | 0.001 | 0.001  | 0.002           | 0.001   | 0.001        | 0.992          |
| CD8+_1     | 0.010  | 0.002 | 0.001 | 0.003  | 0.018           | 0.002   | 0.002        | 0.962          |
| CD8+_2     | 0.003  | 0.001 | 0.001 | 0.001  | 0.005           | 0.001   | 0.001        | 0.988          |
| CD8+_3     | 0.003  | 0.001 | 0.001 | 0.001  | 0.004           | 0.001   | 0.001        | 0.988          |
| CD8+_4     | 0.002  | 0.001 | 0.001 | 0.001  | 0.004           | 0.001   | 0.001        | 0.990          |
| CD8+_5     | 0.003  | 0.001 | 0.000 | 0.001  | 0.005           | 0.001   | 0.001        | 0.989          |
| CD8+_6     | 0.006  | 0.001 | 0.001 | 0.002  | 0.004           | 0.001   | 0.001        | 0.984          |
| CD14+_1    | 0.001  | 0.004 | 0.003 | 0.007  | 0.002           | 0.001   | 0.003        | 0.979          |
| CD14+_2    | 0.003  | 0.005 | 0.006 | 0.053  | 0.003           | 0.001   | 0.008        | 0.921          |
| CD14+_3    | 0.002  | 0.004 | 0.003 | 0.008  | 0.002           | 0.001   | 0.004        | 0.976          |
| CD14+_4    | 0.002  | 0.002 | 0.003 | 0.002  | 0.001           | 0.001   | 0.003        | 0.987          |
| CD14+_5    | 0.002  | 0.002 | 0.002 | 0.015  | 0.002           | 0.001   | 0.005        | 0.971          |
| CD14+_6    | 0.005  | 0.007 | 0.006 | 0.116  | 0.003           | 0.002   | 0.007        | 0.855          |
| CD19+_1    | 0.006  | 0.008 | 0.006 | 0.012  | 0.010           | 0.002   | 0.004        | 0.951          |
| CD19+_2    | 0.004  | 0.006 | 0.008 | 0.025  | 0.006           | 0.001   | 0.004        | 0.944          |
| CD19+_3    | 0.027  | 0.009 | 0.009 | 0.015  | 0.016           | 0.002   | 0.007        | 0.916          |

|         |       |       |       |       |       |       |       |       |
|---------|-------|-------|-------|-------|-------|-------|-------|-------|
| CD19+_4 | 0.002 | 0.004 | 0.004 | 0.004 | 0.003 | 0.001 | 0.001 | 0.980 |
| CD19+_5 | 0.005 | 0.004 | 0.005 | 0.026 | 0.009 | 0.001 | 0.003 | 0.947 |
| CD19+_6 | 0.013 | 0.013 | 0.016 | 0.251 | 0.009 | 0.003 | 0.006 | 0.688 |
| CD56+_1 | 0.004 | 0.002 | 0.002 | 0.002 | 0.010 | 0.001 | 0.002 | 0.978 |
| CD56+_2 | 0.003 | 0.001 | 0.001 | 0.002 | 0.005 | 0.001 | 0.003 | 0.984 |
| CD56+_3 | 0.004 | 0.001 | 0.001 | 0.002 | 0.006 | 0.001 | 0.002 | 0.983 |
| CD56+_4 | 0.001 | 0.001 | 0.001 | 0.001 | 0.003 | 0.001 | 0.001 | 0.992 |
| CD56+_5 | 0.001 | 0.001 | 0.001 | 0.001 | 0.003 | 0.001 | 0.001 | 0.992 |
| CD56+_6 | 0.001 | 0.001 | 0.001 | 0.001 | 0.001 | 0.000 | 0.001 | 0.993 |
| Neu_1   | 0.002 | 0.004 | 0.003 | 0.006 | 0.003 | 0.001 | 0.005 | 0.977 |
| Neu_2   | 0.002 | 0.003 | 0.003 | 0.007 | 0.002 | 0.001 | 0.006 | 0.976 |
| Neu_3   | 0.003 | 0.004 | 0.003 | 0.005 | 0.002 | 0.001 | 0.007 | 0.976 |
| Neu_4   | 0.002 | 0.003 | 0.002 | 0.004 | 0.001 | 0.001 | 0.005 | 0.981 |
| Neu_5   | 0.002 | 0.002 | 0.002 | 0.008 | 0.002 | 0.001 | 0.004 | 0.981 |
| Neu_6   | 0.004 | 0.003 | 0.003 | 0.024 | 0.002 | 0.001 | 0.004 | 0.959 |
| Eos_1   | 0.001 | 0.004 | 0.003 | 0.004 | 0.002 | 0.001 | 0.004 | 0.981 |
| Eos_2   | 0.003 | 0.004 | 0.005 | 0.023 | 0.003 | 0.001 | 0.010 | 0.951 |
| Eos_3   | 0.002 | 0.004 | 0.004 | 0.006 | 0.002 | 0.001 | 0.008 | 0.974 |
| Eos_4   | 0.002 | 0.002 | 0.003 | 0.002 | 0.002 | 0.001 | 0.005 | 0.984 |
| Eos_5   | 0.002 | 0.002 | 0.002 | 0.007 | 0.002 | 0.001 | 0.006 | 0.978 |
| Eos_6   | 0.004 | 0.005 | 0.005 | 0.058 | 0.003 | 0.001 | 0.008 | 0.917 |

WB: Whole blood, PBMC: Peripheral blood mononuclear cells, Gran: Granulocytes, Neu: Neutrophil, Eos: Eosinophil

Table S7 - Probability scores and final predictions for undiagnosed cases and VUS variants

| <b>Id</b> | <b>sex</b> | <b>age</b> | <b>Suspected phenotype</b> | <b>Screened Gene</b> | <b>Mutation</b>                            | <b>ACMG Variant classification</b> | <b>DNA methylation prediction</b> | <b>Kabuki</b> | <b>ATRX</b> | <b>Sotos</b> | <b>CHARGE</b> | <b>Floating Harbor</b> | <b>ADCA-DN</b> | <b>Claes-Jensen</b> | <b>Non 7-disorder</b> |
|-----------|------------|------------|----------------------------|----------------------|--------------------------------------------|------------------------------------|-----------------------------------|---------------|-------------|--------------|---------------|------------------------|----------------|---------------------|-----------------------|
| MS1050    | m          | 4.3        | ATRX                       | ATRX                 | c.2254A>G; p.T752A                         | VUS                                |                                   | 0             | 0           | 0            | 0             | 0                      | 0              | 0                   | 0.99                  |
| MS0567    | m          | 11.5       | ATRX                       | ATRX                 | c.5579A>G; p.N1860S                        | Benign                             |                                   | 0.01          | 0.01        | 0            | 0             | 0                      | 0              | 0                   | 0.97                  |
| MS1020    | f          | 2.5        | CHARGE                     | CHD7                 | c.5041+5G>A                                | VUS                                | CHARGE                            | 0.03          | 0.01        | 0.01         | 0.82          | 0.02                   | 0.01           | 0.01                | 0.1                   |
| MS0978    | f          | 0.8        | CHARGE                     | CHD7                 | c.2788G>A, p.E930K                         | VUS                                |                                   | 0             | 0           | 0            | 0             | 0.01                   | 0              | 0                   | 0.98                  |
| MS0980    | m          | 16         | CHARGE                     | CHD7                 | c.6775+1G>A                                | VUS                                | CHARGE                            | 0.01          | 0.01        | 0.01         | 0.94          | 0.01                   | 0.01           | 0.01                | 0                     |
| MS0981    | m          | 3.5        | CHARGE                     | CHD7                 | c.2058insGCAAAA                            | VUS                                |                                   | 0.02          | 0           | 0            | 0.01          | 0                      | 0              | 0                   | 0.97                  |
| MS1028    | m          | 4.3        | CHARGE                     | CHD7                 | c.2185A>G, p.K729E                         | VUS                                | Kabuki                            | 0.92          | 0.01        | 0.01         | 0.01          | 0.02                   | 0.01           | 0.01                | 0.02                  |
| MS1031    | f          | 7.5        | CHARGE                     | CHD7                 | c.5405-17G>A (de novo)                     | Pathogenic                         | CHARGE                            | 0.04          | 0.02        | 0.01         | 0.65          | 0.01                   | 0.01           | 0.01                | 0.25                  |
| MS1034    | m          | 0.01       | CHARGE                     | CHD7                 | c.5405-17G>A                               | Pathogenic                         | CHARGE                            | 0.02          | 0.02        | 0.01         | 0.89          | 0.01                   | 0.01           | 0.01                | 0.02                  |
| MS0986    | m          | 0.01       | CHARGE                     | CHD7                 | c.5405-17G>A                               | VUS                                |                                   | 0.02          | 0.04        | 0.01         | 0.2           | 0.01                   | 0.01           | 0                   | 0.71                  |
| MS0988    | f          | 2.5        | CHARGE                     | CHD7                 | c.3990-58insA, c.5210+58insA, c.5535-68T>C | VUS                                |                                   | 0.01          | 0           | 0            | 0.07          | 0                      | 0              | 0                   | 0.91                  |
| MS0990    | m          | 10.1       | CHARGE                     | CHD7                 | c.6104-22_6104-4del19                      | VUS                                | CHARGE                            | 0.03          | 0.03        | 0.02         | 0.82          | 0.03                   | 0.01           | 0.03                | 0.03                  |
| MS0993    | f          | 1.5        | CHARGE                     | CHD7                 | c.2957+5delG                               | VUS                                |                                   | 0.02          | 0.01        | 0            | 0.17          | 0.01                   | 0.01           | 0                   | 0.79                  |
| MS1042    | f          | 0.9        | CHARGE                     | CHD7                 | c.2124T>C, p.S708S                         | VUS                                |                                   | 0.01          | 0.01        | 0            | 0.15          | 0.01                   | 0              | 0                   | 0.81                  |
| MS1043    | m          | 0.2        | CHARGE                     | CHD7                 | c.1565G>T, p.G522V                         | VUS                                |                                   | 0             | 0           | 0            | 0.07          | 0                      | 0              | 0                   | 0.92                  |
| MS1047    | m          | 3          | CHARGE                     | CHD7                 | No mutation was found in CHD7              | N/A                                | CHARGE                            | 0.02          | 0.01        | 0.01         | 0.91          | 0.02                   | 0.01           | 0.01                | 0.02                  |
| MS0994    | f          | 13.1       | CHARGE                     | CHD7                 | c.712G>A, p.V238M                          | VUS                                |                                   | 0.04          | 0.02        | 0            | 0.01          | 0.01                   | 0.01           | 0                   | 0.91                  |
| MS0997    | f          | 0.4        | CHARGE                     | CHD7                 | c.5534+16T>C                               | VUS                                |                                   | 0             | 0.01        | 0            | 0             | 0                      | 0              | 0                   | 0.97                  |
| MS0998    | f          | 4.4        | CHARGE                     | CHD7                 | c.2915A>G, Q972R                           | VUS                                | CHARGE                            | 0.04          | 0.02        | 0.01         | 0.82          | 0.03                   | 0.01           | 0.02                | 0.05                  |
| MS0999    | f          | 0.3        | CHARGE                     | CHD7                 | c.2053_2058dup6, c.5517dupT                | VUS                                | CHARGE                            | 0.02          | 0.01        | 0.01         | 0.92          | 0.01                   | 0.01           | 0.02                | 0.01                  |
| MS1000    | f          | 0.01       | CHARGE                     | CHD7                 | c.2490C>A                                  | VUS                                | CHARGE                            | 0.02          | 0.02        | 0.01         | 0.92          | 0.01                   | 0.01           | 0.01                | 0.01                  |
| MS1001    | m          | 0.2        | CHARGE                     | CHD7                 | c.4533+1G>A                                | Pathogenic                         | CHARGE                            | 0.03          | 0.02        | 0.01         | 0.8           | 0.01                   | 0.01           | 0.03                | 0.09                  |
| MS1006    | m          | 0.001      | CHARGE                     | CHD7                 | c.6321C>T, p.H2107H                        | VUS                                |                                   | 0.01          | 0.01        | 0.01         | 0.18          | 0.01                   | 0.01           | 0                   | 0.78                  |
| MS1008    | f          | 0.9        | CHARGE                     | CHD7                 | c.6937-1G>A                                | Pathogenic                         | CHARGE                            | 0.04          | 0.04        | 0.03         | 0.82          | 0.02                   | 0.02           | 0.02                | 0.02                  |
| CHD7-20   | f          | 5          | CHARGE                     | CHD7                 | c.6322G>T (p.Gly2108Trp)                   | VUS                                |                                   | 0.02          | 0.01        | 0            | 0.15          | 0.01                   | 0              | 0                   | 0.75                  |



|         |   |      |        |      |                                              |     |        |      |      |      |      |      |      |      |      |
|---------|---|------|--------|------|----------------------------------------------|-----|--------|------|------|------|------|------|------|------|------|
| CHD7-21 | f | 3    | CHARGE | CHD7 | c.3746G>A (p.Arg1249Gln)                     | VUS | CHARGE | 0.02 | 0.01 | 0.01 | 0.73 | 0.02 | 0    | 0.01 | 0.2  |
| CHD7-22 | f | 0.01 | CHARGE | CHD7 | c2751G>A (p.Thr917Thr)                       | VUS |        | 0    | 0    | 0    | 0.08 | 0    | 0    | 0    | 0.9  |
| CHD7-23 | m | 0.5  | CHARGE | CHD7 | c.-15G>A                                     | VUS | CHARGE | 0.02 | 0.01 | 0.01 | 0.69 | 0.01 | 0.01 | 0.01 | 0.25 |
| CHD7-24 | m | 2    | CHARGE | CHD7 | c.4225G>A (p.Val1409Met)                     | VUS | CHARGE | 0.02 | 0.01 | 0.01 | 0.74 | 0.01 | 0    | 0.01 | 0.2  |
| CHD7-25 | m | 13   | CHARGE | CHD7 | c.5436C>G (p.Asp1812Glu)                     | VUS | CHARGE | 0.02 | 0.02 | 0.02 | 0.83 | 0.01 | 0.01 | 0.02 | 0.07 |
| CHD7-26 | m | 4    | CHARGE | CHD7 | c.5633A>G (p.Asp1878Gly)                     | VUS |        | 0    | 0    | 0    | 0    | 0    | 0    | 0    | 0.99 |
| CHD7-27 | m | 4    | CHARGE | CHD7 | c.5848G>A (p.Ala1950Thr)                     | VUS |        | 0.01 | 0    | 0    | 0.02 | 0    | 0    | 0    | 0.97 |
| CHD7-28 | m | 13   | CHARGE | CHD7 | c.6304G>T (p.Val2102Phe)                     | VUS |        | 0    | 0    | 0    | 0.01 | 0    | 0    | 0    | 0.99 |
| CHD7-29 | m | 6    | CHARGE | CHD7 | c.3566G>A (p.Arg1189His)                     | VUS |        | 0    | 0    | 0    | 0.03 | 0    | 0    | 0    | 0.95 |
| CHD7-30 | m | 0.08 | CHARGE | CHD7 | intron4:c2238+1del                           | VUS | CHARGE | 0.01 | 0.01 | 0.01 | 0.95 | 0    | 0    | 0.01 | 0    |
| CHD7-31 | m | 5    | CHARGE | CHD7 | c.2049_2050insAAAGCA (p.Ala685_Lys686dup)    | VUS |        | 0    | 0    | 0    | 0    | 0    | 0    | 0    | 0.99 |
| CHD7-32 | m | 9    | CHARGE | CHD7 | c.6377A>T (p.Asp2126Val)                     | VUS |        | 0    | 0    | 0    | 0.04 | 0    | 0    | 0    | 0.95 |
| CHD7-33 | m |      | CHARGE | CHD7 | c.4851T>G (p.=(p.Gly1617Gly))                | VUS |        | 0    | 0    | 0    | 0.02 | 0    | 0    | 0    | 0.97 |
| CHD7-35 | f |      | CHARGE | CHD7 | c.8791 G>A (p.Val2931Met)                    | VUS | CHARGE | 0.02 | 0.01 | 0.01 | 0.86 | 0.01 | 0    | 0    | 0.09 |
| CHD7-37 | m |      | CHARGE | CHD7 | c.8802C>G (p.Ser2934Arg)                     | VUS |        | 0    | 0    | 0    | 0.02 | 0    | 0    | 0    | 0.98 |
| CHD7-38 | m |      | CHARGE | CHD7 | c.2516_2518delAGT (p.Gln839_Trp840delinsArg) | VUS | CHARGE | 0.03 | 0.02 | 0.01 | 0.77 | 0.02 | 0.01 | 0.01 | 0.13 |
| CHD7-39 | f |      | CHARGE | CHD7 | c.8759G>C (p.Gly2920Ala)                     | VUS |        | 0    | 0    | 0    | 0    | 0    | 0    | 0    | 0.99 |
| CHD7-42 | f |      | CHARGE | CHD7 | c.127A>G (p.Ile43Val)                        | VUS | CHARGE | 0.01 | 0.01 | 0    | 0.96 | 0.01 | 0    | 0    | 0    |
| CHD7-43 | m |      | CHARGE | CHD7 | c.1405A>G (p.Arg469Gly)                      | VUS |        | 0    | 0    | 0    | 0    | 0    | 0    | 0    | 0.99 |
| CHD7-44 | f |      | CHARGE | CHD7 | c.7763A>G (p.Asn2588Ser)                     | VUS | CHARGE | 0.01 | 0.01 | 0    | 0.97 | 0    | 0    | 0.01 | 0    |
| CHD7-45 | m |      | CHARGE | CHD7 | c.3871A>C (p.Lys1291Gln)                     | VUS | CHARGE | 0.01 | 0.01 | 0.01 | 0.95 | 0.01 | 0    | 0.01 | 0    |
| CHD7-48 | m |      | CHARGE | CHD7 | c.6193C>T (p.Arg2065Cys)                     | VUS | CHARGE | 0.02 | 0.02 | 0.01 | 0.89 | 0.01 | 0.01 | 0.01 | 0.04 |
| CHD7-49 | f |      | CHARGE | CHD7 | c.3762T>A (p.His1254Gln)                     | VUS | CHARGE | 0.02 | 0.01 | 0.01 | 0.91 | 0.02 | 0    | 0.01 | 0.01 |
| CHD7-50 | m |      | CHARGE | CHD7 | c.583C>T (p.Arg195Cys)                       | VUS |        | 0    | 0    | 0    | 0.01 | 0    | 0    | 0    | 0.99 |
| CHD7-54 | f |      | CHARGE | CHD7 | c.1562C>T (p.Pro521Leu)                      | VUS |        | 0    | 0    | 0    | 0.03 | 0    | 0    | 0    | 0.97 |
| CHD7-57 | f |      | CHARGE | CHD7 | c.5666-9C>G                                  | VUS | CHARGE | 0.01 | 0.01 | 0.01 | 0.96 | 0.01 | 0    | 0.01 | 0    |
| CHD7-59 | m |      | CHARGE | CHD7 | c.1797_1799delGAA (p.Lys602del)              | VUS |        | 0    | 0    | 0    | 0    | 0    | 0    | 0    | 0.99 |
| CHD7-62 | f |      | CHARGE | CHD7 | c.5429G>C (p.Arg1810Pro)                     | VUS | CHARGE | 0.03 | 0.01 | 0    | 0.77 | 0.01 | 0.01 | 0.01 | 0.16 |
| CHD7-65 | m |      | CHARGE | CHD7 | c.5827C>T (p.Arg1943Trp)                     | VUS |        | 0.01 | 0    | 0    | 0.08 | 0    | 0    | 0.01 | 0.89 |

|         |   |      |                        |              |                                    |               |        |      |      |      |      |      |      |      |      |
|---------|---|------|------------------------|--------------|------------------------------------|---------------|--------|------|------|------|------|------|------|------|------|
| CHD7-66 | m |      | CHARGE                 | <i>CHD7</i>  | c.317A>G (p.His106Arg)             | VUS           |        | 0.01 | 0    | 0    | 0.11 | 0    | 0    | 0    | 0.86 |
| CHD7-67 | m |      | CHARGE                 | <i>CHD7</i>  | c.6529G>A (p.Gln2177Lys)           | VUS           |        | 0.01 | 0.02 | 0.02 | 0.15 | 0.01 | 0    | 0.01 | 0.79 |
| CHD7-70 | f |      | CHARGE                 | <i>CHD7</i>  | c.6356A>G (p.Asp2119Gly)           | VUS           | CHARGE | 0.03 | 0.01 | 0.01 | 0.81 | 0.02 | 0.01 | 0.01 | 0.1  |
| MS0694  | f | 54   | Claes-Jensen - carrier | <i>KDM5C</i> | c.1510G>A; p.V504M                 | Pathogenic    |        | 0.03 | 0.01 | 0.01 | 0.03 | 0.02 | 0.01 | 0.1  | 0.8  |
| MS0696  | f | 31   | Claes-Jensen - carrier | <i>KDM5C</i> | c.1510G>A; p.V504M                 | Pathogenic    |        | 0.01 | 0.01 | 0    | 0.01 | 0.01 | 0    | 0.04 | 0.92 |
| MS0725  | f | 66   | Claes-Jensen - carrier | <i>KDM5C</i> | c.229G>A; p.A77T                   | Pathogenic    |        | 0.03 | 0.01 | 0.01 | 0.03 | 0.01 | 0.01 | 0.11 | 0.79 |
| MS0729  | f | 17   | Claes-Jensen - carrier | <i>KDM5C</i> | c.229G>A; p.A77T                   | Pathogenic    |        | 0.02 | 0.01 | 0.01 | 0.03 | 0.02 | 0    | 0.1  | 0.82 |
| MS0730  | f | 51   | Claes-Jensen - carrier | <i>KDM5C</i> | c.4439_4440DdelAG; p.fsR1481fxX9   | Pathogenic    |        | 0.02 | 0.01 | 0    | 0.02 | 0.01 | 0    | 0.05 | 0.89 |
| MS0731  | f | 39   | Claes-Jensen - carrier | <i>KDM5C</i> | c.229G>A; p.A77T                   | Pathogenic    |        | 0.06 | 0.03 | 0.02 | 0.1  | 0.04 | 0.02 | 0.27 | 0.66 |
| MS0732  | f | 55   | Claes-Jensen - carrier | <i>KDM5C</i> | c.229G>A; p.A77T                   | Pathogenic    |        | 0.02 | 0.01 | 0.01 | 0.03 | 0.01 | 0    | 0.08 | 0.85 |
| MS0733  | f | 54   | Claes-Jensen - carrier | <i>KDM5C</i> | c.1510G>A; p.V504M                 | Pathogenic    |        | 0.05 | 0.02 | 0.01 | 0.06 | 0.03 | 0.01 | 0.14 | 0.68 |
| KDM6A   | f |      | Kabuki                 | <i>KDM6A</i> | c.2668_2669dupTA (p.Pro891Thrfs*8) | Pathogenic    | Kabuki | 0.65 | 0.01 | 0.01 | 0.07 | 0.02 | 0.01 | 0.02 | 0.21 |
| MS0710  | f | 9.1  | Kabuki                 | <i>KMT2D</i> | c.8382C>A (p.G2794G )              | Likely_Benign |        | 0    | 0    | 0    | 0    | 0    | 0    | 0    | 0.99 |
| MS0712  | m | 10.8 | Kabuki                 | <i>KMT2D</i> | c.2438C>T (p.P813L )               | Benign        |        | 0    | 0    | 0    | 0    | 0    | 0    | 0    | 0.99 |
| MS0714  | f | 14.4 | Kabuki                 | <i>KMT2D</i> | c.15540G>C (p.V5180V )             | Likely_Benign |        | 0    | 0    | 0    | 0    | 0    | 0    | 0    | 0.99 |
| MS0715  | f | 9.3  | Kabuki                 | <i>KMT2D</i> | c.5868-25G>A                       | Likely_Benign |        | 0.24 | 0.01 | 0    | 0.02 | 0.01 | 0    | 0.01 | 0.71 |
| MS0716  | f | 1.3  | Kabuki                 | <i>KMT2D</i> | c.16229G>A (p.G5410E)              | VUS           | Kabuki | 0.9  | 0.01 | 0.01 | 0.02 | 0.01 | 0.01 | 0.01 | 0.04 |
| MS0717  | f | 9.2  | Kabuki                 | <i>KMT2D</i> | c.1938C>G (p.P646P )               | Likely_Benign |        | 0.07 | 0    | 0    | 0.01 | 0    | 0    | 0    | 0.91 |
| MS0718  | m | 2.8  | Kabuki                 | <i>KMT2D</i> | c.4265G>C (p.W1422S)               | VUS           | Kabuki | 0.62 | 0.02 | 0.01 | 0.03 | 0.02 | 0.01 | 0.01 | 0.3  |
| MS0734  | f | 3.6  | Kabuki                 | <i>KMT2D</i> | c.15641G>T (p.R5214L )             | VUS           | Kabuki | 0.9  | 0.01 | 0.01 | 0.01 | 0.02 | 0.01 | 0.01 | 0.04 |
| MS0736  | f | 1.4  | Kabuki                 | <i>KMT2D</i> | c.3907-15C>G                       | Likely_Benign |        | 0.06 | 0.01 | 0    | 0.01 | 0.01 | 0    | 0.01 | 0.9  |
| MS0742  | m | 1.2  | Kabuki                 | <i>KMT2D</i> | c.11750_11758del9                  | VUS           |        | 0    | 0    | 0    | 0    | 0    | 0    | 0    | 0.98 |
| MS0791  | f | 2.8  | Kabuki                 | <i>KMT2D</i> | c.10741-42G>A                      | Likely_Benign |        | 0    | 0    | 0    | 0    | 0    | 0    | 0    | 0.99 |
| MS0797  | m | 13.8 | Kabuki                 | <i>KMT2D</i> | c.12889T>C (p.S4297P)              | VUS           |        | 0    | 0    | 0    | 0    | 0    | 0    | 0    | 0.99 |
| MS0775  | m | 1.8  | Kabuki                 | <i>KMT2D</i> | c.4143G>A (p.V1381V )              | VUS           |        | 0    | 0    | 0    | 0    | 0    | 0    | 0    | 0.99 |
| MS0777  | m | 13.4 | Kabuki                 | <i>KMT2D</i> | c.401-11delC                       | Likely_Benign |        | 0.02 | 0    | 0    | 0.01 | 0    | 0    | 0    | 0.97 |
| MS0779  | m | 6.3  | Kabuki                 | <i>KMT2D</i> | c.12913G>A (p.V4305I )             | Likely_Benign |        | 0    | 0    | 0    | 0    | 0    | 0    | 0    | 0.99 |
| MS0780  | m | 1.3  | Kabuki                 | <i>KMT2D</i> | c.6752C>T (p.S2251L )              | Likely_Benign |        | 0.01 | 0    | 0    | 0    | 0    | 0    | 0    | 0.99 |

|          |   |     |                  |              |                                             |            |        |      |      |      |      |      |      |      |      |
|----------|---|-----|------------------|--------------|---------------------------------------------|------------|--------|------|------|------|------|------|------|------|------|
| MS0781   | f | 4.3 | Kabuki           | <i>KMT2D</i> | c.15108_15110del3<br>(p.H5036_E5037delinsQ) | VUS        | Kabuki | 0.94 | 0.01 | 0    | 0.01 | 0.01 | 0.01 | 0.01 | 0.01 |
| MS0785   | m | 7.7 | Kabuki           | <i>KMT2D</i> | c.13644C>T (p.S4548S)                       | Benign     |        | 0    | 0    | 0    | 0.01 | 0    | 0    | 0    | 0.98 |
| KMT2D-12 | f | 4.5 | Kabuki           | <i>KMT2D</i> | c.15143G>A<br>(p.Arg5048His)                | VUS        | Kabuki | 0.9  | 0.01 | 0.01 | 0.02 | 0.01 | 0.01 | 0.01 | 0.04 |
| KMT2D-13 | m | 5   | Kabuki           | <i>KMT2D</i> | c.12028 T>C (p.Ser4010Pro)                  | VUS        |        | 0    | 0    | 0    | 0.01 | 0    | 0    | 0    | 0.98 |
| KMT2D-14 | f | 15  | Kabuki           | <i>KMT2D</i> | c.16522-5_16522-4delTT                      | VUS        | Kabuki | 0.69 | 0.01 | 0.01 | 0.06 | 0.01 | 0.01 | 0.02 | 0.19 |
| KMT2D-15 | m | 14  | Kabuki           | <i>KMT2D</i> | c.15910A>G (p.Ile5304Val)                   | VUS        |        | 0.01 | 0    | 0    | 0.17 | 0.01 | 0    | 0.01 | 0.79 |
| KMT2D-16 | m | 17  | Kabuki           | <i>KMT2D</i> | c.15659G>A<br>(p.Arg5220His)                | VUS        |        | 0    | 0    | 0    | 0.02 | 0    | 0    | 0    | 0.96 |
| KMT2D-17 | m | 9   | Kabuki           | <i>KMT2D</i> | c.10256A>G<br>(p.Asp3419Gly)                | VUS        |        | 0    | 0    | 0    | 0.01 | 0    | 0    | 0    | 0.98 |
| KMT2D-18 | f | 16  | Kabuki           | <i>KMT2D</i> | c.8974G>A (p.Glu2992Lys)                    | VUS        |        | 0    | 0    | 0    | 0    | 0    | 0    | 0    | 0.99 |
| KMT2D-19 | f | 8   | Kabuki           | <i>KMT2D</i> | c.8831A>G (p.Asn2944Ser)                    | VUS        |        | 0    | 0    | 0    | 0.01 | 0    | 0    | 0    | 0.98 |
| KMT2D-20 | f | 10  | Kabuki           | <i>KMT2D</i> | c.832G>A (p.Ala278Thr)                      | VUS        |        | 0    | 0    | 0    | 0.01 | 0    | 0    | 0    | 0.99 |
| KMT2D-21 | m | 6   | Kabuki           | <i>KMT2D</i> | c.682C>G (p.Arg228Gly)                      | VUS        |        | 0    | 0    | 0    | 0.01 | 0    | 0    | 0    | 0.98 |
| KMT2D-23 | m |     | Kabuki           | <i>KMT2D</i> | c.15587T>A<br>(p.Met5196Lys)                | VUS        |        | 0    | 0    | 0.01 | 0.03 | 0    | 0    | 0    | 0.95 |
| KMT2D-24 | f |     | Kabuki           | <i>KMT2D</i> | c.11150A>C (p.Gln3717Pro)                   | VUS        |        | 0    | 0    | 0    | 0    | 0    | 0    | 0    | 0.98 |
| KMT2D-27 | m |     | Kabuki           | <i>KMT2D</i> | c.11578_11580dupCAG<br>(p.Gln3863dup)       | VUS        |        | 0    | 0    | 0    | 0.06 | 0    | 0    | 0    | 0.93 |
| KMT2D-28 | m |     | Kabuki           | <i>KMT2D</i> | c.10909C>A (p.Pro3637Thr)                   | VUS        |        | 0.01 | 0.01 | 0    | 0.22 | 0    | 0    | 0    | 0.75 |
| KMT2D-31 | m |     | Kabuki           | <i>KMT2D</i> | c.12662_12664dupAGC<br>(p.Gln4221dup)       | VUS        |        | 0    | 0    | 0    | 0.03 | 0    | 0    | 0    | 0.96 |
| KMT2D-34 | f |     | Kabuki           | <i>KMT2D</i> | c.2334C>G (p.Cys778Trp)                     | VUS        |        | 0    | 0    | 0    | 0.1  | 0    | 0    | 0    | 0.88 |
| KMT2D-35 | f |     | Kabuki           | <i>KMT2D</i> | c.14731_14733delCCT<br>(p.Pro4911del)       | VUS        |        | 0    | 0    | 0    | 0    | 0    | 0    | 0    | 0.99 |
| KMT2D-37 | f |     | Kabuki           | <i>KMT2D</i> | c.15626G>T (p.Gly5209Val)                   | VUS        | Kabuki | 0.79 | 0.01 | 0.01 | 0.04 | 0.01 | 0.01 | 0.01 | 0.11 |
| DL141677 | m | 18  | Sotos_fibroblast | <i>NSDI</i>  | ex20-21 del (1860-2086 aa)                  | Pathogenic | Sotos  | 0.03 | 0.1  | 0.65 | 0.03 | 0.05 | 0.01 | 0.03 | 0.1  |
| 51537F   | f | 1.6 | Sotos_fibroblast | <i>NSDI</i>  | c.1810C>T (p.Arg604*)                       | Pathogenic | Sotos  | 0.05 | 0.1  | 0.58 | 0.04 | 0.05 | 0.01 | 0.03 | 0.13 |
| SF155    | f |     | Sotos_fibroblast | <i>NSDI</i>  | c.2362C>T (p.Arg788*)                       | Pathogenic | Sotos  | 0.06 | 0.1  | 0.62 | 0.04 | 0.04 | 0.01 | 0.03 | 0.1  |
| DL208122 | m | 2.3 | Sotos            | <i>NSDI</i>  | c.6437G>C (p.Cys2146Ser)                    | VUS        | Sotos  | 0.03 | 0.03 | 0.68 | 0.06 | 0.01 | 0.01 | 0.02 | 0.17 |
| DL136303 | f | 5   | Sotos            | <i>NSDI</i>  | c.5779G>C (p.Ala1927Pro)                    | VUS        | Sotos  | 0.01 | 0.02 | 0.86 | 0.04 | 0.01 | 0.01 | 0.01 | 0.04 |
| DL199861 | m | 7   | Sotos            | <i>NSDI</i>  | c.6412T>C (p.Cys2138Arg)                    | VUS        | Sotos  | 0.03 | 0.03 | 0.65 | 0.06 | 0.02 | 0.01 | 0.02 | 0.19 |
| DL181344 | m | 13  | Sotos            | <i>NSDI</i>  | c.4949A>G (p.Asn1650Ser)                    | VUS        |        | 0    | 0    | 0    | 0    | 0    | 0    | 0    | 0.99 |
| DL73286  | m | 10  | Sotos            | <i>NSDI</i>  | c.3722G>C (p.Ser1241Thr)                    | VUS        |        | 0    | 0    | 0    | 0.01 | 0    | 0    | 0    | 0.99 |

|          |   |     |                                   |              |                          |            |                 |      |      |      |      |      |      |      |      |
|----------|---|-----|-----------------------------------|--------------|--------------------------|------------|-----------------|------|------|------|------|------|------|------|------|
| DL159025 | m | 2.5 | Sotos                             | <i>NSDI</i>  | c.6013C>G (p.Arg2005Gly) | VUS        | Sotos           | 0.01 | 0.02 | 0.9  | 0.02 | 0.01 | 0.01 | 0.01 | 0.03 |
| HK-9776  | f |     | Sotos                             | <i>NSDI</i>  | c.1070A>G (p.Asn357Ser)  | VUS        |                 | 0.01 | 0    | 0    | 0.01 | 0    | 0    | 0    | 0.98 |
| HK-12366 | f |     | Sotos                             | <i>NSDI</i>  | c.3446A>G (p.Asn1149Ser) | VUS        |                 | 0    | 0    | 0    | 0.02 | 0    | 0    | 0    | 0.97 |
| HK-5474  | f |     | Sotos                             | <i>NSDI</i>  | c.4817G>A (p.Cys1606Tyr) | VUS        | Sotos           | 0.01 | 0.02 | 0.84 | 0.06 | 0.01 | 0.01 | 0.01 | 0.03 |
| HK-11693 | f |     | Sotos                             | <i>NSDI</i>  | c.5177C>G (p.Pro1726Arg) | VUS        | Sotos           | 0.01 | 0.02 | 0.9  | 0.02 | 0.01 | 0    | 0.01 | 0.04 |
| HK-11767 | f |     | Sotos                             | <i>NSDI</i>  | c.5357A>G (p.Lys1786Arg) | VUS        |                 | 0    | 0    | 0    | 0    | 0    | 0    | 0    | 0.99 |
| HK-5581  | m |     | Sotos                             | <i>NSDI</i>  | c.5903T>C (p.Val1968Ala) | VUS        |                 | 0.03 | 0.02 | 0.1  | 0.17 | 0.01 | 0.01 | 0.02 | 0.59 |
| HK-3326  | f |     | Sotos                             | <i>NSDI</i>  | c.5990A>G (p.Tyr1997Cys) | VUS        | Sotos           | 0.02 | 0.02 | 0.81 | 0.04 | 0.01 | 0.01 | 0.01 | 0.08 |
| HK-435   | m |     | Sotos                             | <i>NSDI</i>  | c.6049C>T (p.Arg2017Trp) | VUS        | Sotos           | 0.01 | 0.02 | 0.89 | 0.03 | 0.01 | 0.01 | 0.01 | 0.03 |
| HK-6943  | m |     | Sotos                             | <i>NSDI</i>  | c.6674C>A (p.Pro2225Gln) | VUS        |                 | 0    | 0    | 0    | 0.01 | 0    | 0    | 0    | 0.99 |
| HK-14867 | m |     | Sotos                             | <i>NSDI</i>  | c.7421A>G (p.Gln2474Arg) | VUS        |                 | 0    | 0    | 0    | 0    | 0    | 0    | 0    | 0.99 |
| MS0436   | f | 40  | Floating Harbor<br>(Sex mismatch) | <i>SRCAP</i> | p.Arg2748*               | Pathogenic | Floating Harbor | 0.02 | 0.02 | 0.01 | 0.02 | 0.87 | 0.01 | 0.02 | 0.03 |

Reference sequence for all mutations is hg19, except for NSDI mutations (hg18)
